# Supplementary material for: Light and Methyl Jasmonate Impact in the Biosynthesis of Anthocyanins and VLCFAs in the <em>Euonymus maximowiczianus</em> Aril-Derived Long-Term Suspension-Cultured Cells
Source: Preprints.org preprint supplement (doi:10.20944/preprints202309.0039.v2), 2023-12-11

# Light and Methyl Jasmonate Impact in the Biosynthesis of Anthocyanins and VLCFAs in the *Euonymus maximowiczianus* Aril-Derived Long-Term Suspension-Cultured Cells

## Supplementary Materials:

Figure S5. HPLC-DAD chromatograms of the methanolic extracts of the control and MeJa-treated *Euonymus maximowiczianus* suspension-cultured cells from different passages. Em-L – under-light-grown suspension cell culture of *Euonymus maximowiczianus*; Em-D – dark-grown suspension cell culture of *Euonymus maximowiczianus*. Anthocyanin profile was detected at 520 nm. Retention time (min): 8.728 – delphinidin-3-O-hexoside; 9.54 – cyanidin-3-O-hexoside; 10.78 – peonidin-3-O-hexoside.

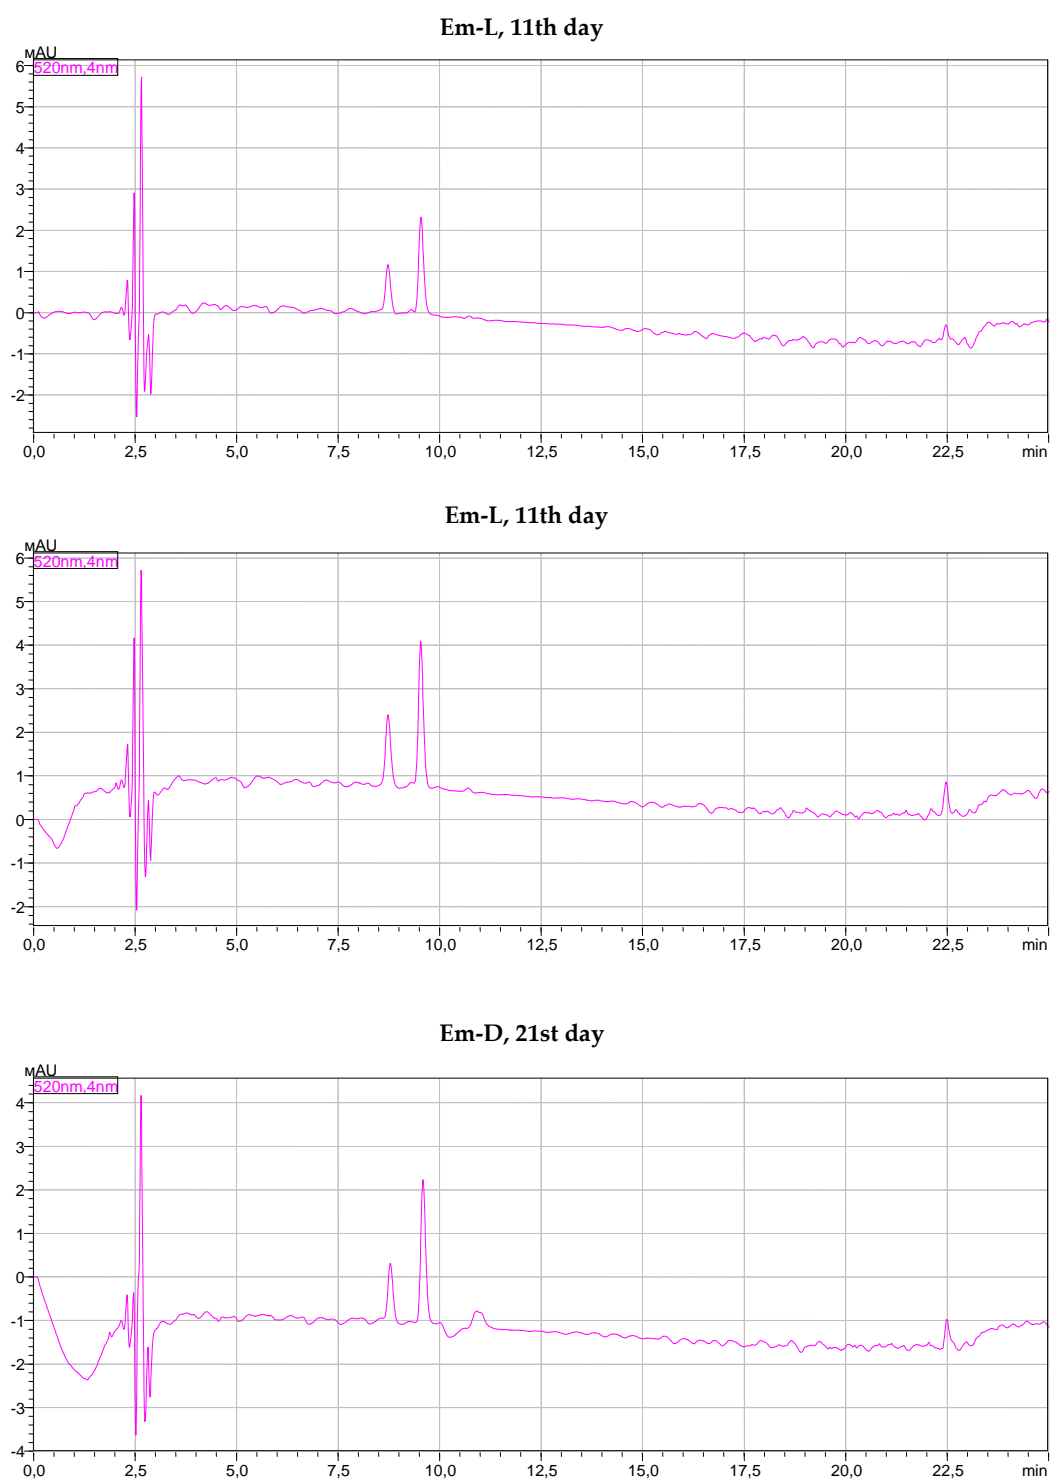

Em-D, 21st day

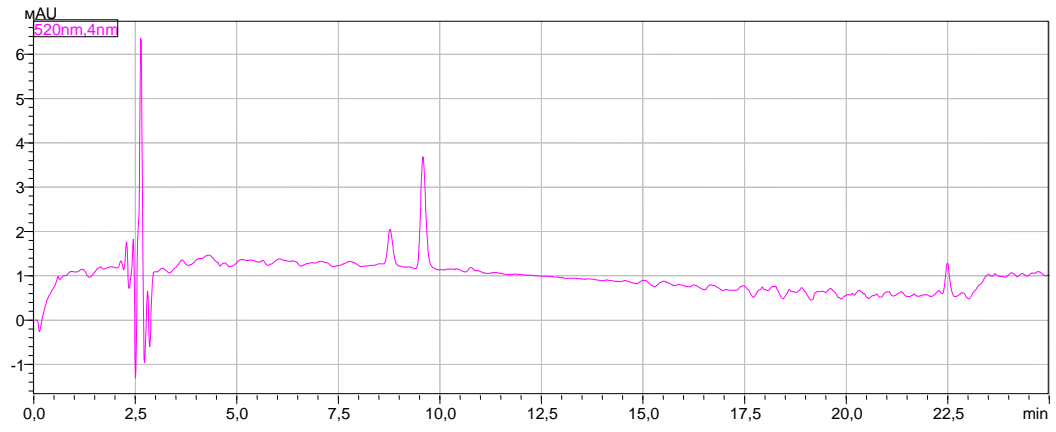

Em-L, 21st day

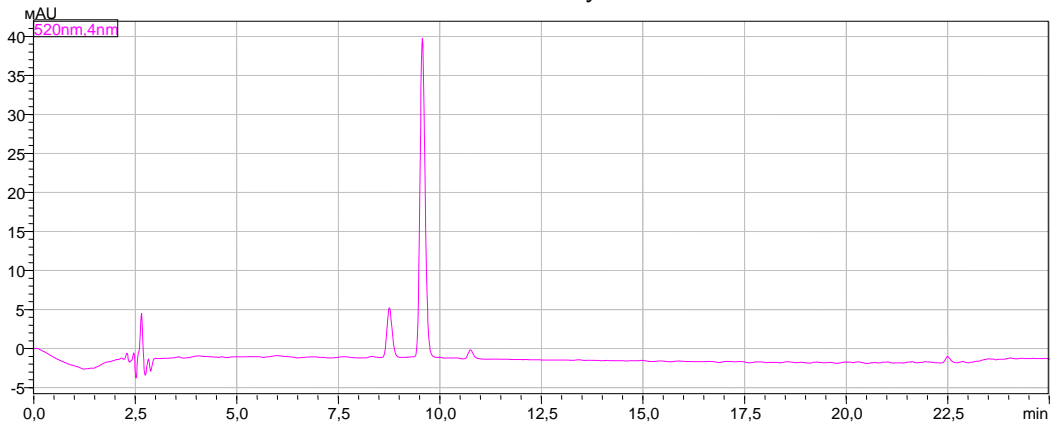

Em-L, 21st day

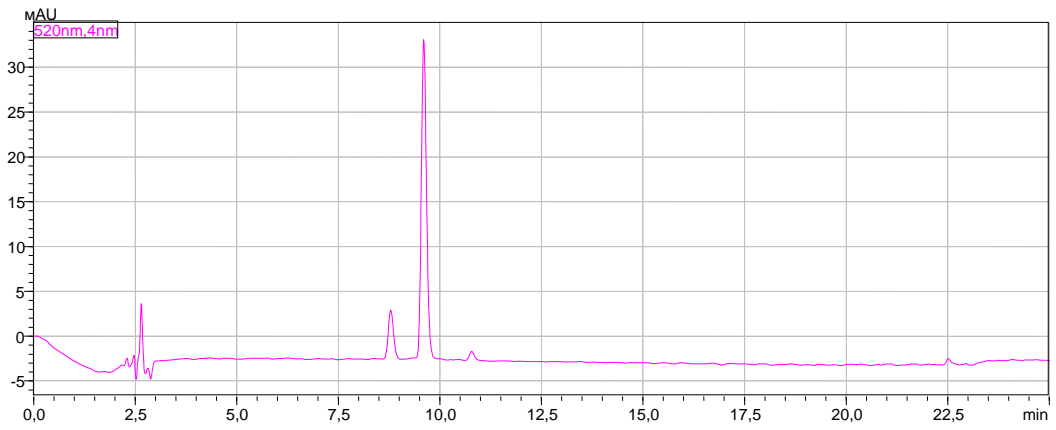

Em-D, 31st day

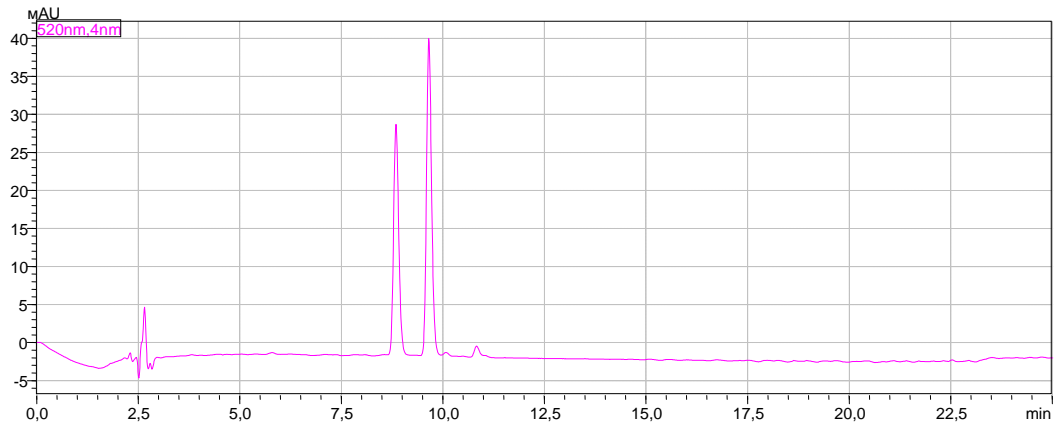

Em-D, 31st day

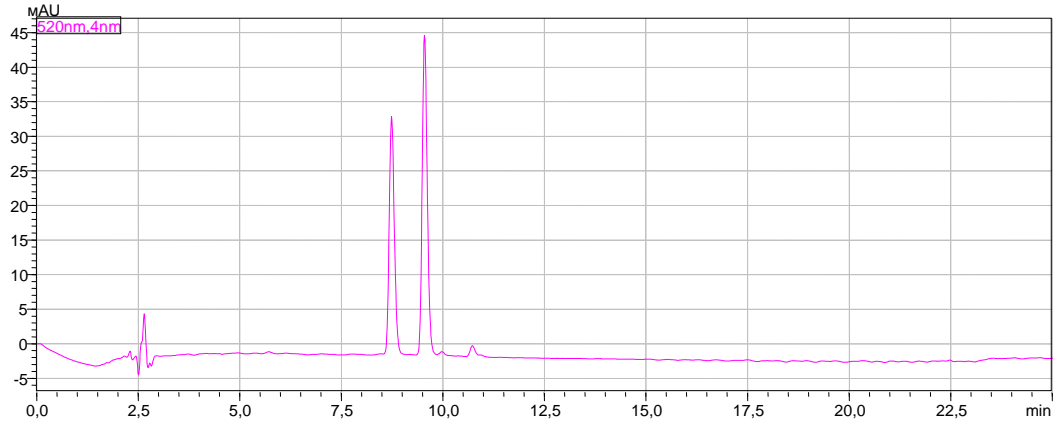

Em-L, 31st day

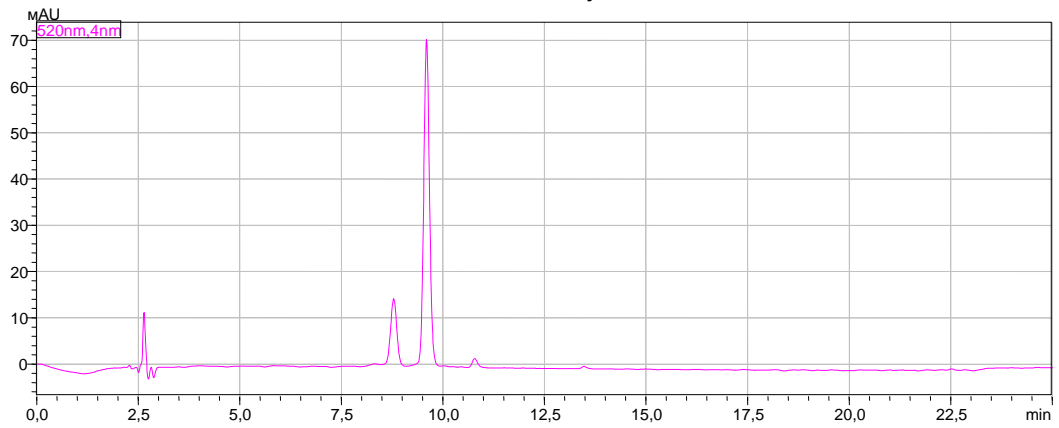

Em-L, 31st day

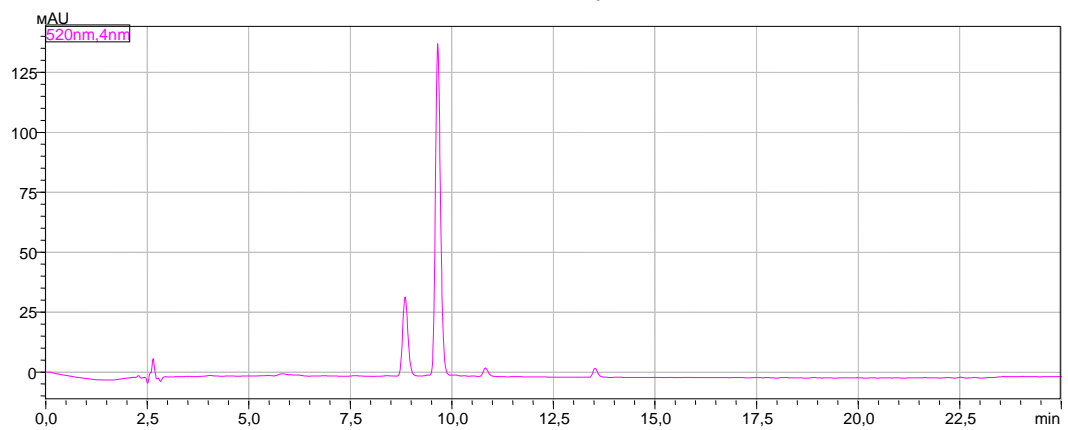

Em-D, 14th day (control)

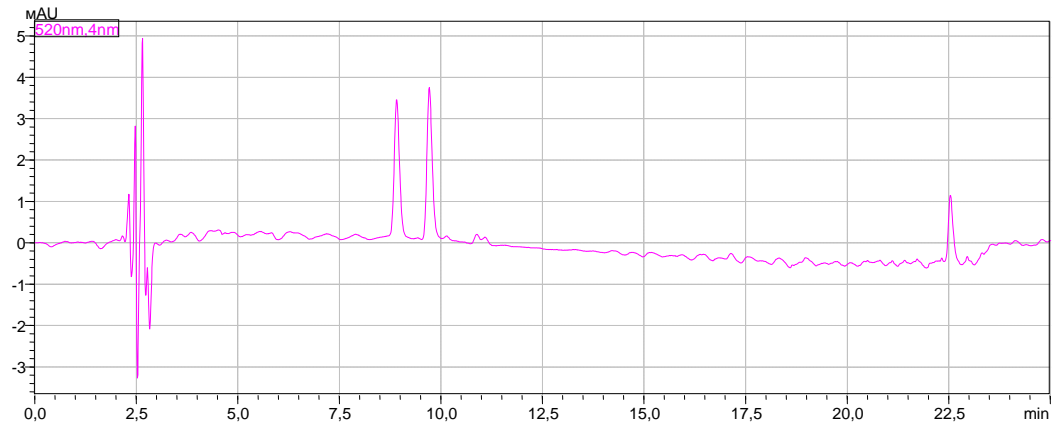

Em-D, 14th day (control)

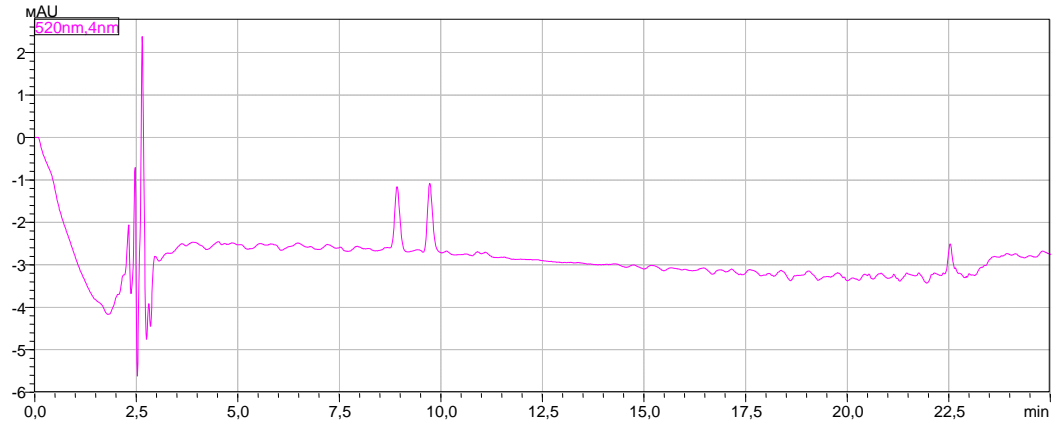

Em-D, 14th day (control)

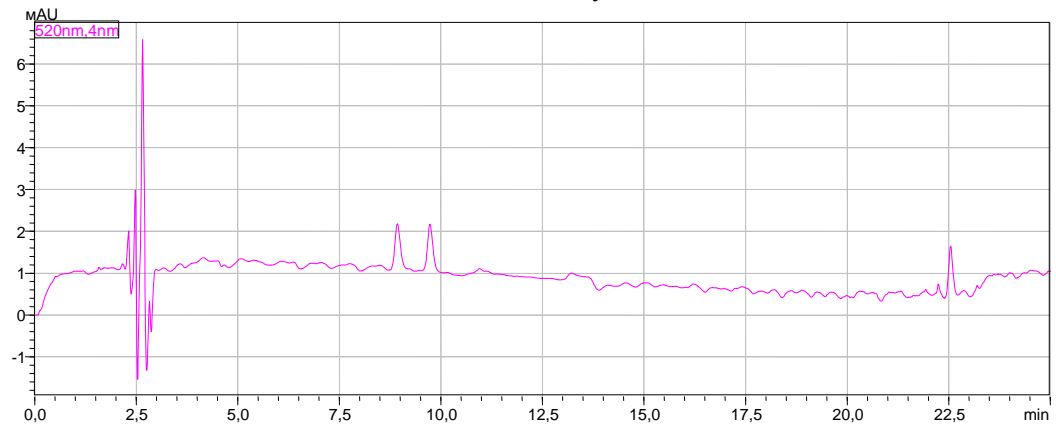

Em-D + MeJa, 14th day

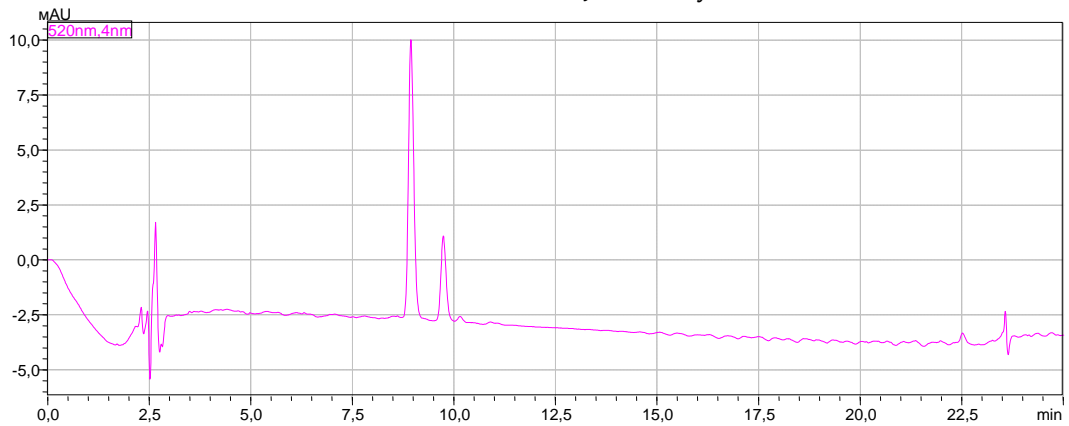

Em-D + MeJa, 14th day

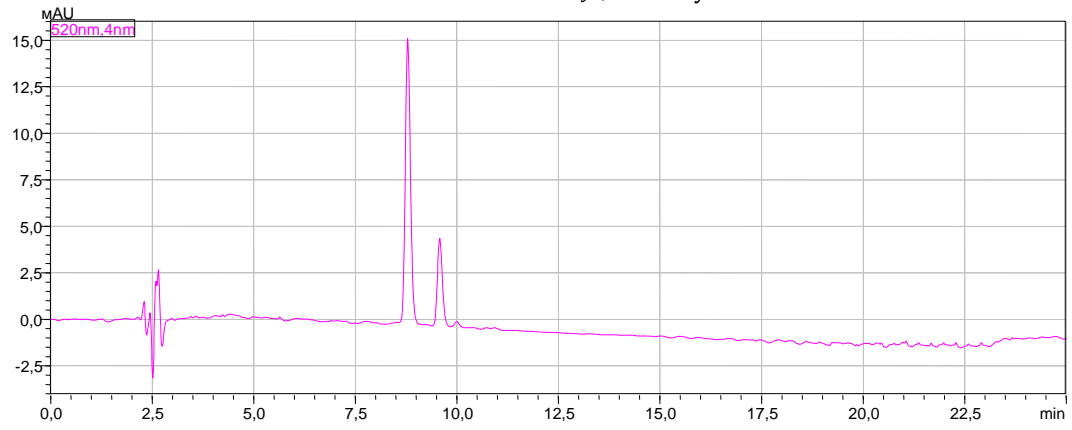

Em-D + MeJa, 14th day

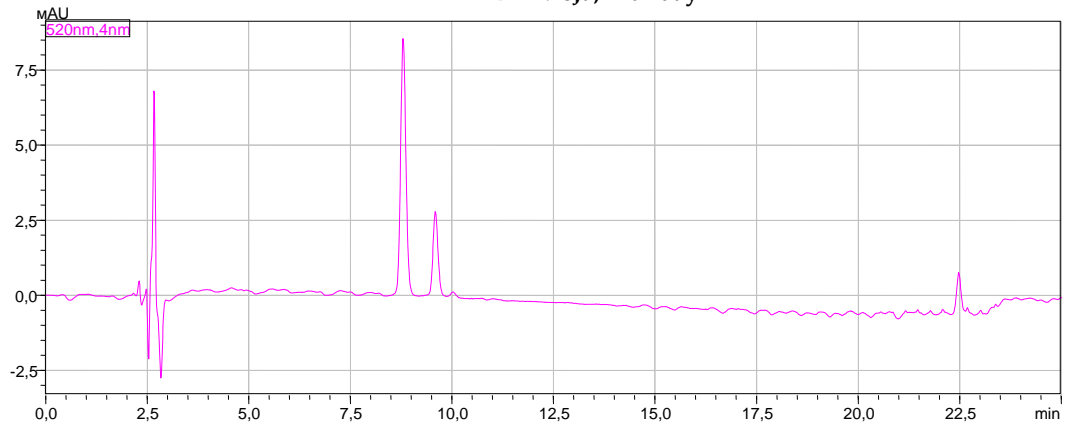

Em-L, 14th day (control)

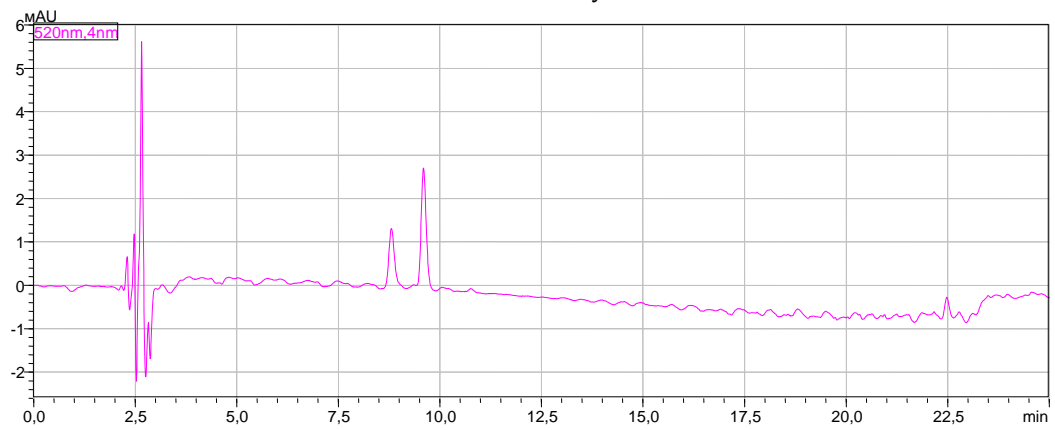

Em-L, 14th day (control)

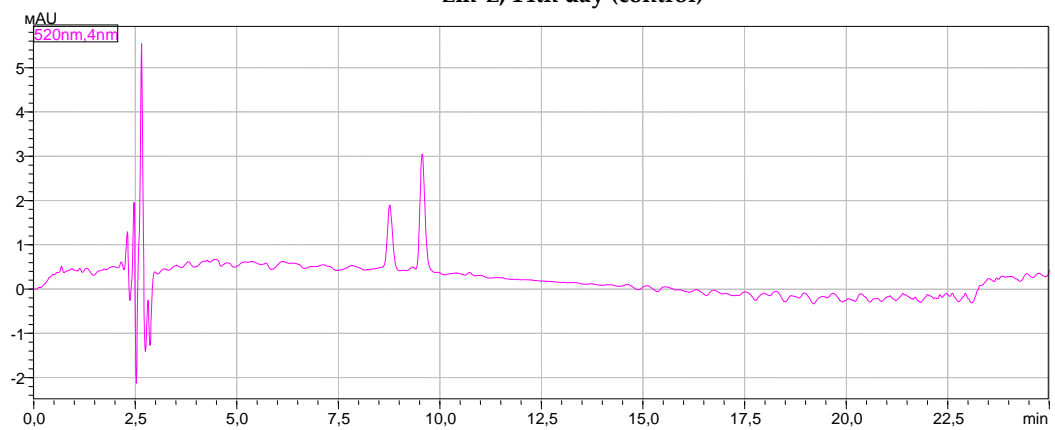

Em-L, 14th day (control)

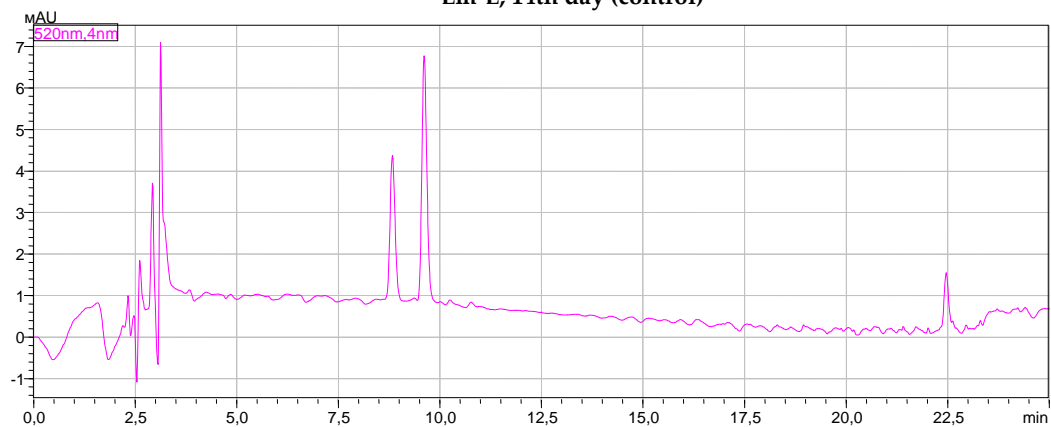

Em-L + MeJa, 14th day

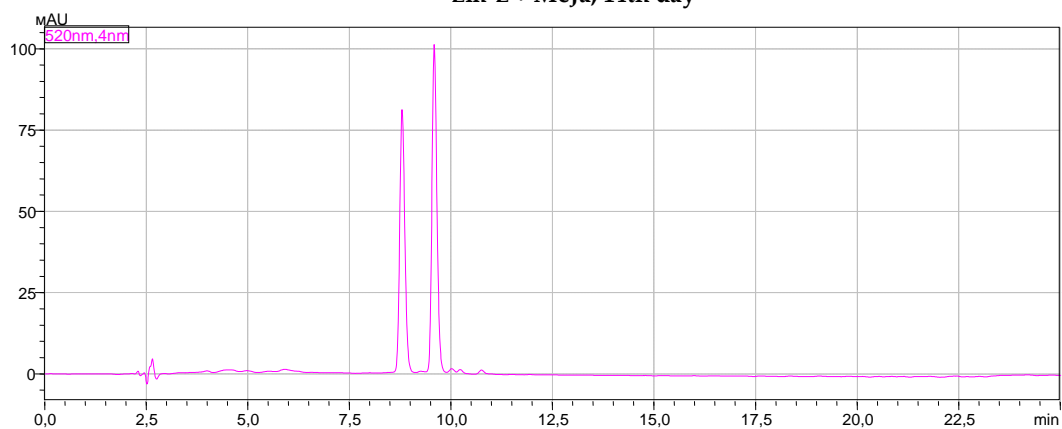

Em-L + MeJa, 14th day

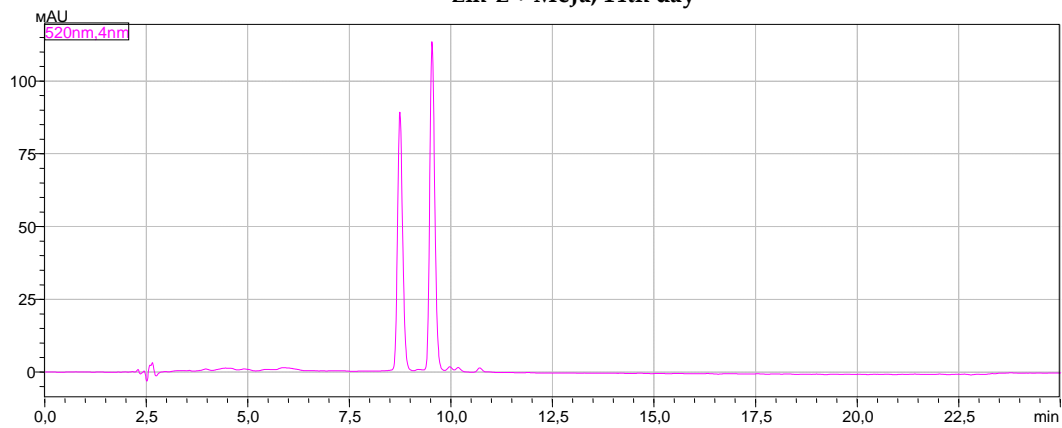

Em-L + MeJa, 14th day

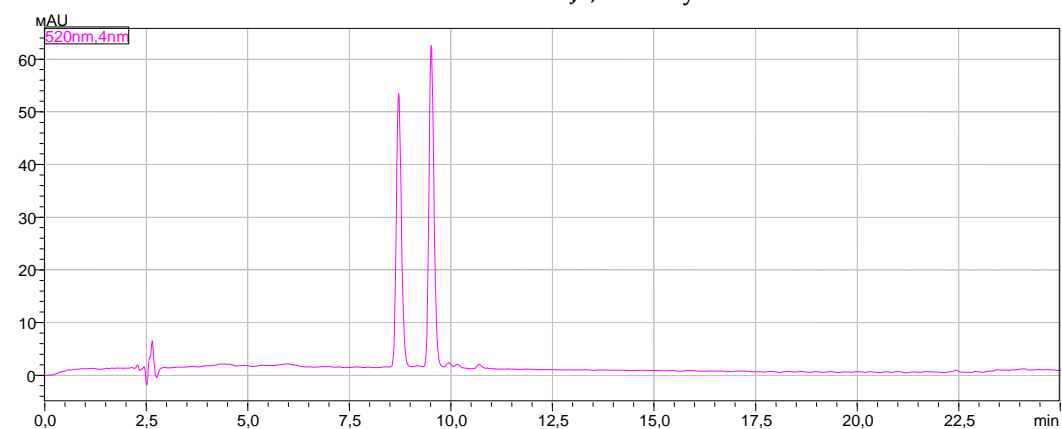

Em-L, 11th day

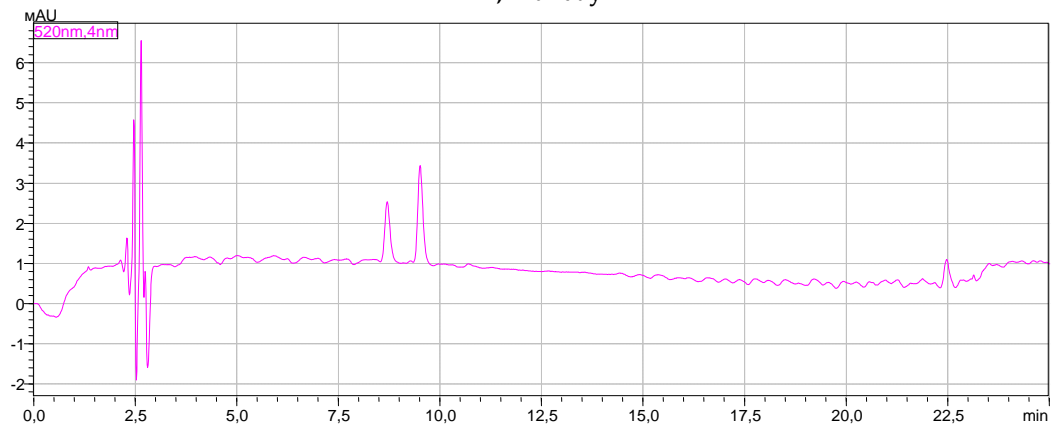

Em-L, 11th day

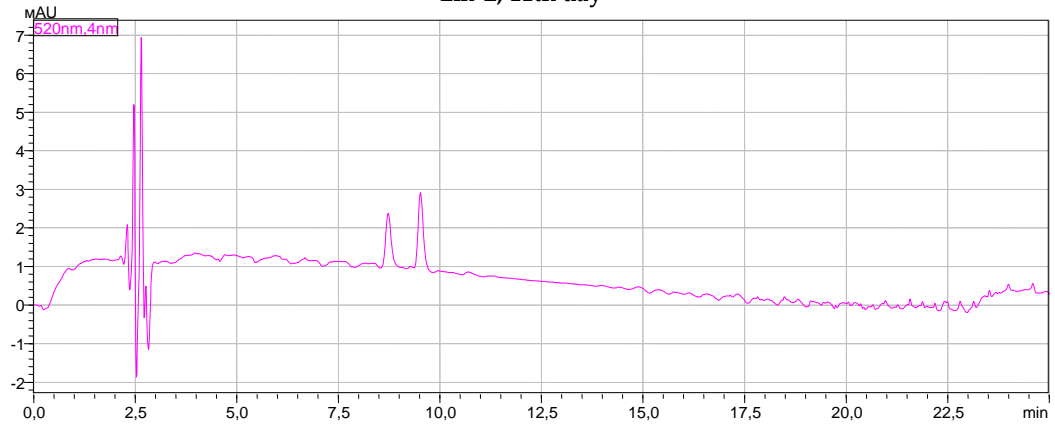

Em-L, 21st day

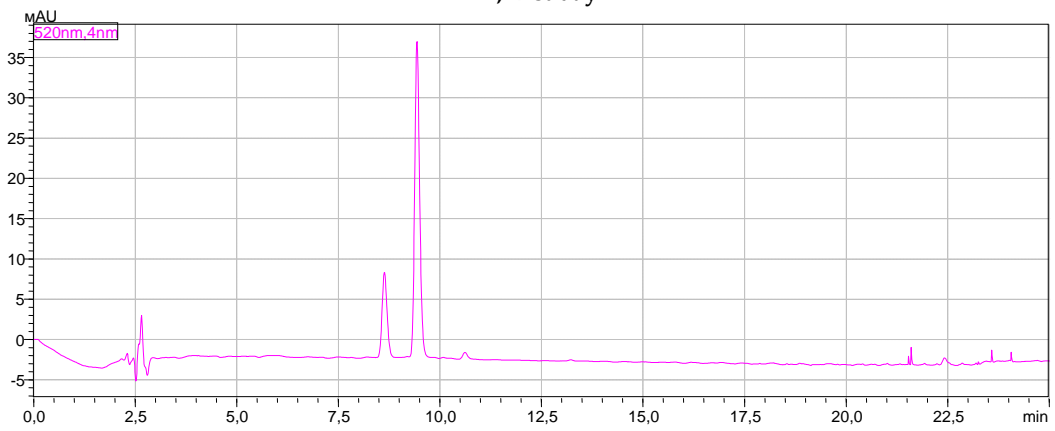

Em-L, 21st day

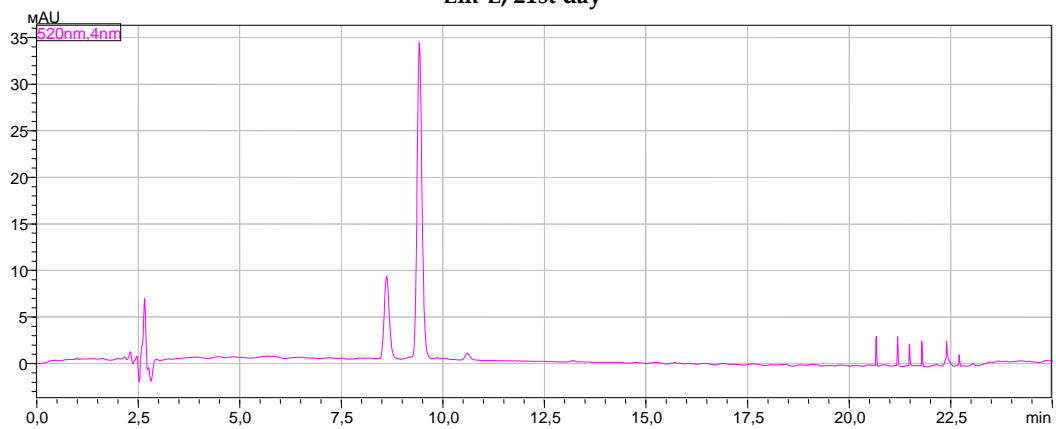

Em-D, 21st day

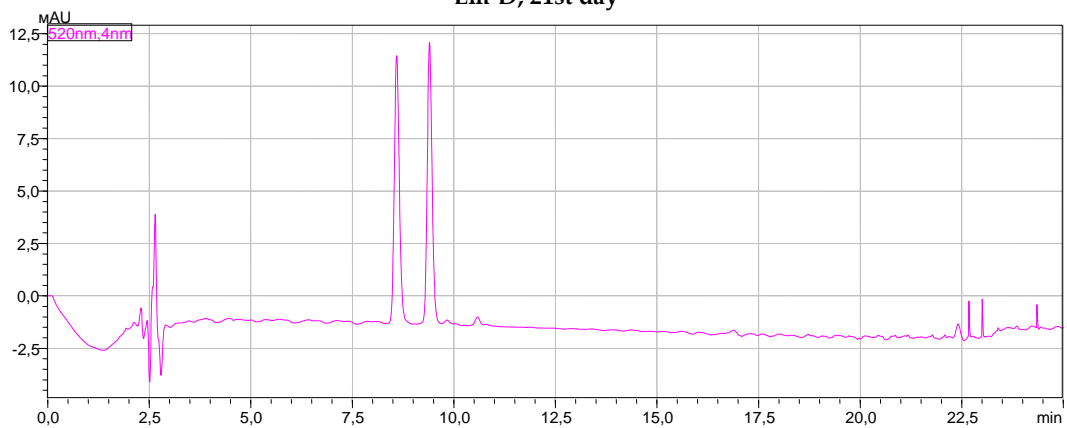

Em-D, 21st day

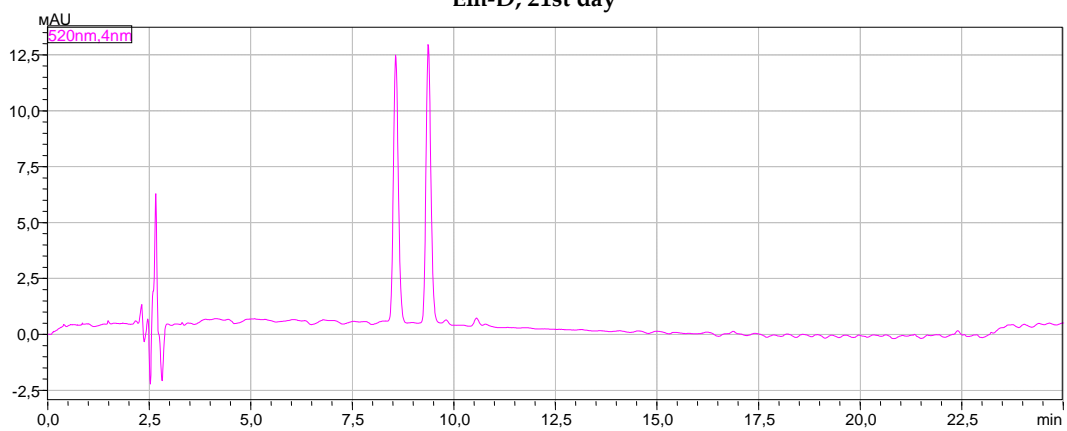



Em-D, 31st day

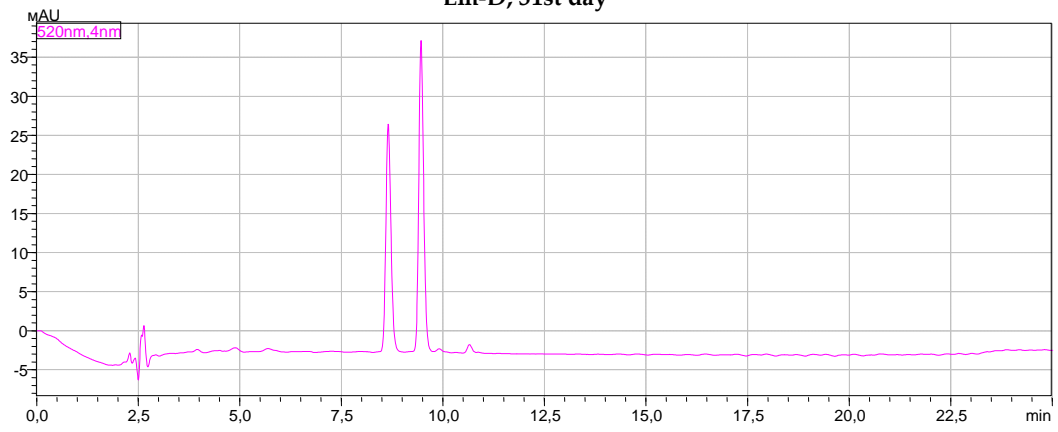

Em-D, 31st day

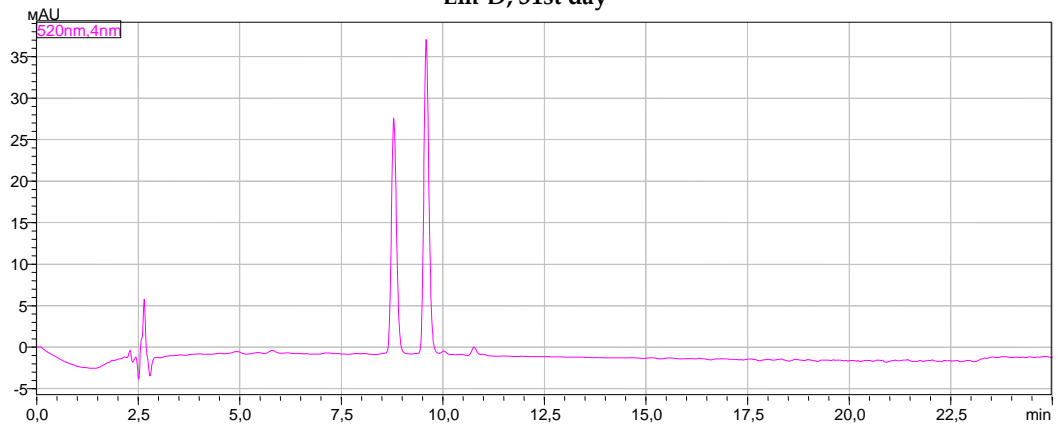

Ripe aril

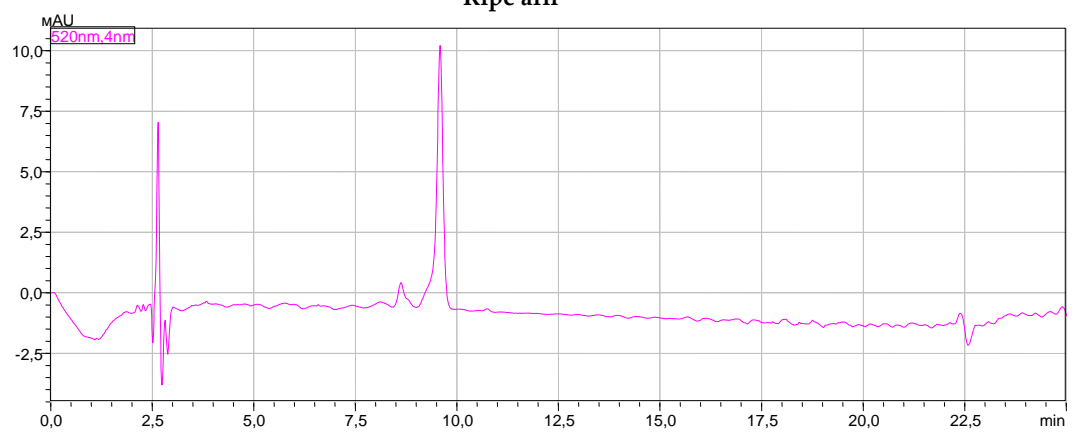

Em-D, 14th day (control)

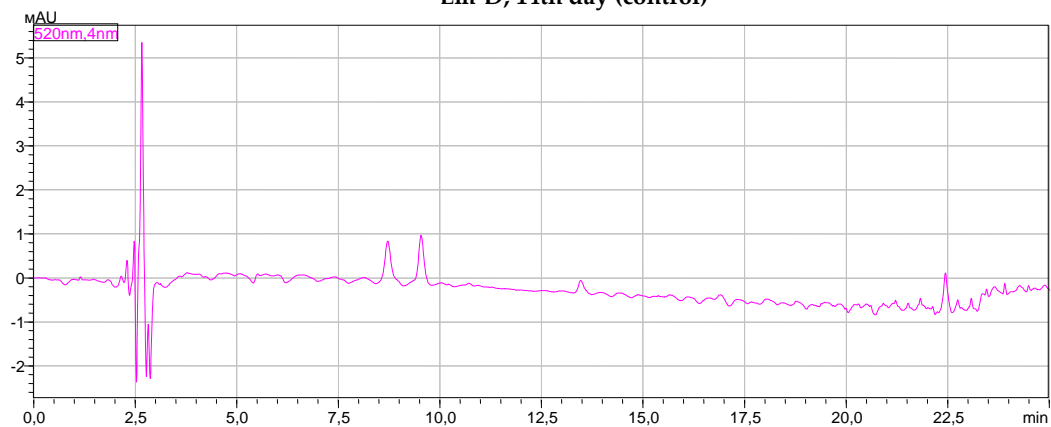

Em-D + MeJa, 14th day

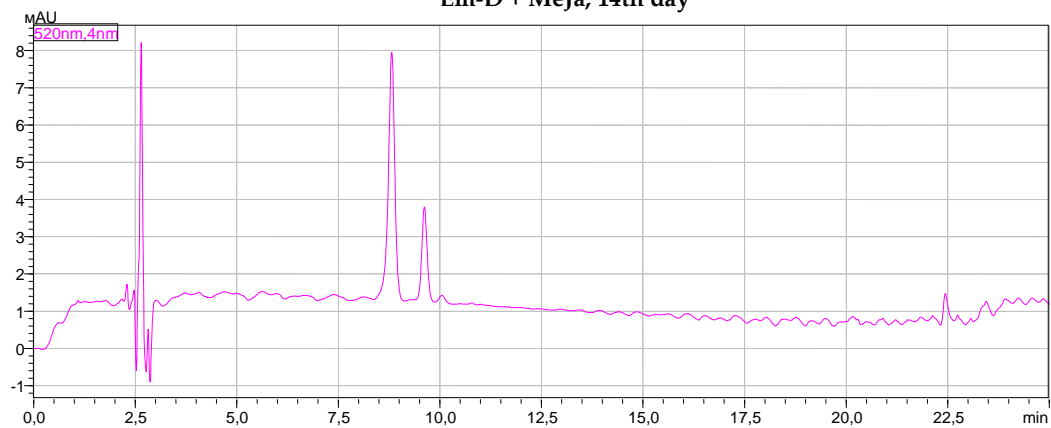

Em-L, 14th day (control)

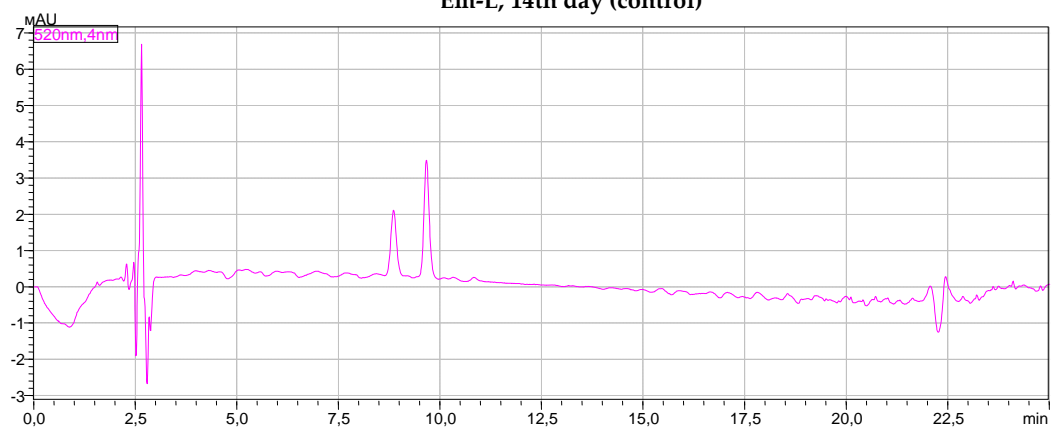

Em-L + MeJa, 14th day

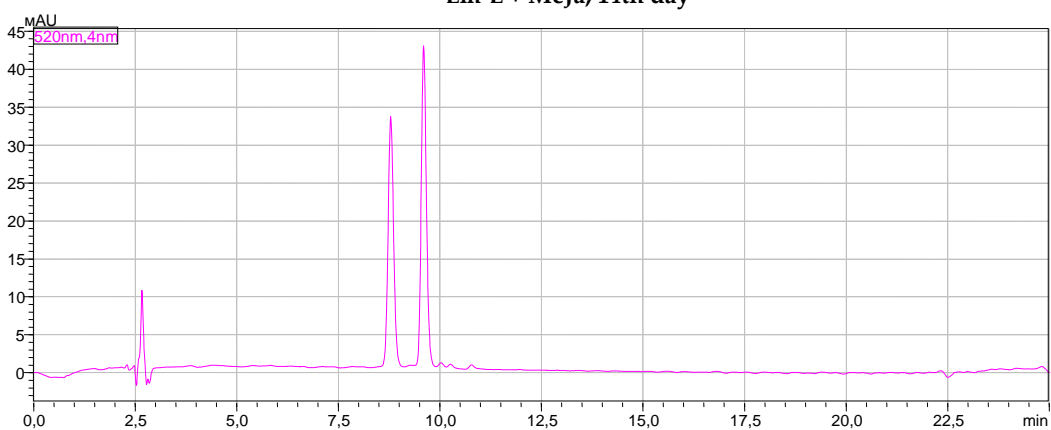

Em-D, 21st day

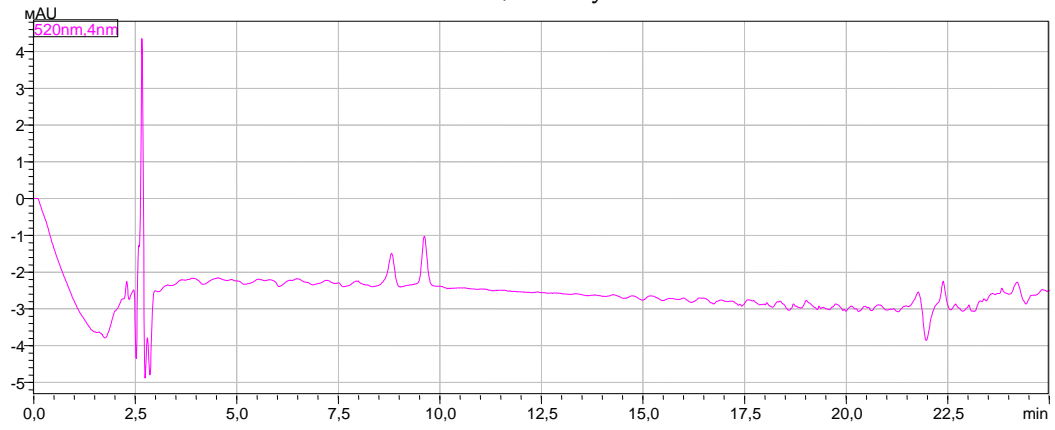

Em-D, 21st day

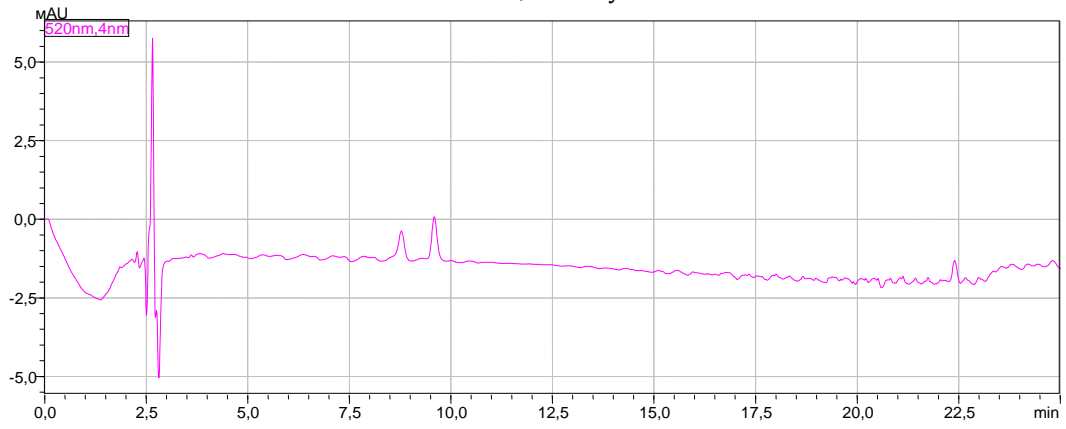

Em-L, 21st day

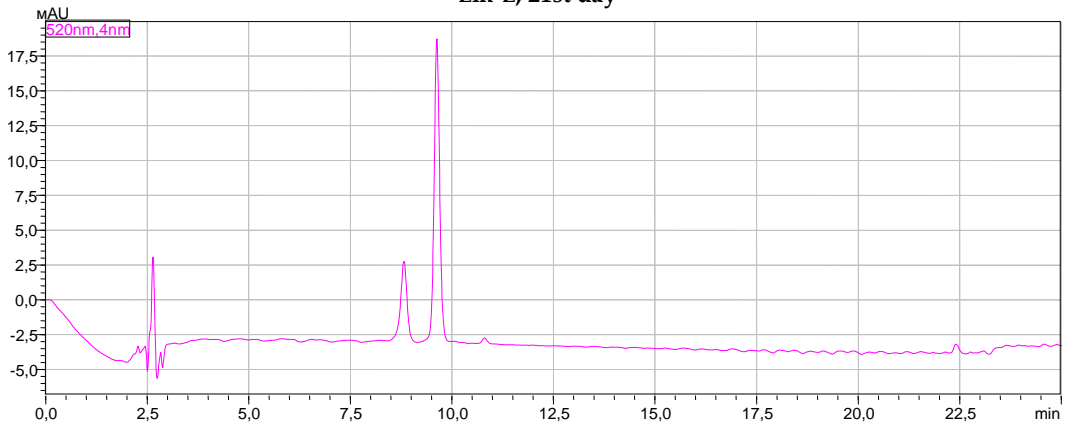

Em-L, 21st day

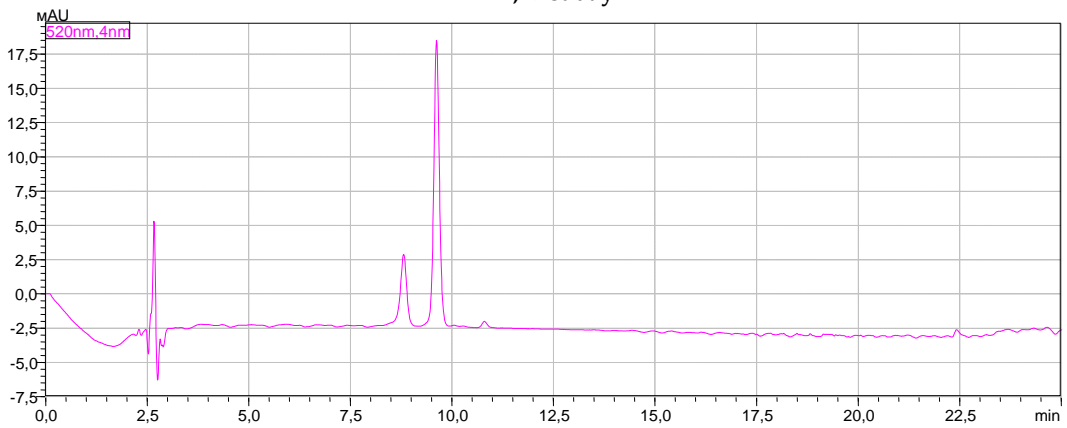

### Ripe capsules

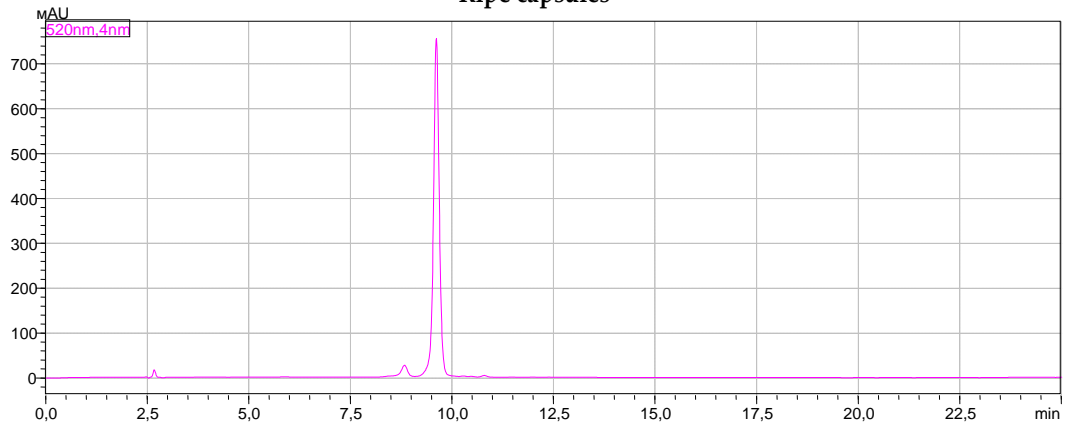

### Ripe capsules

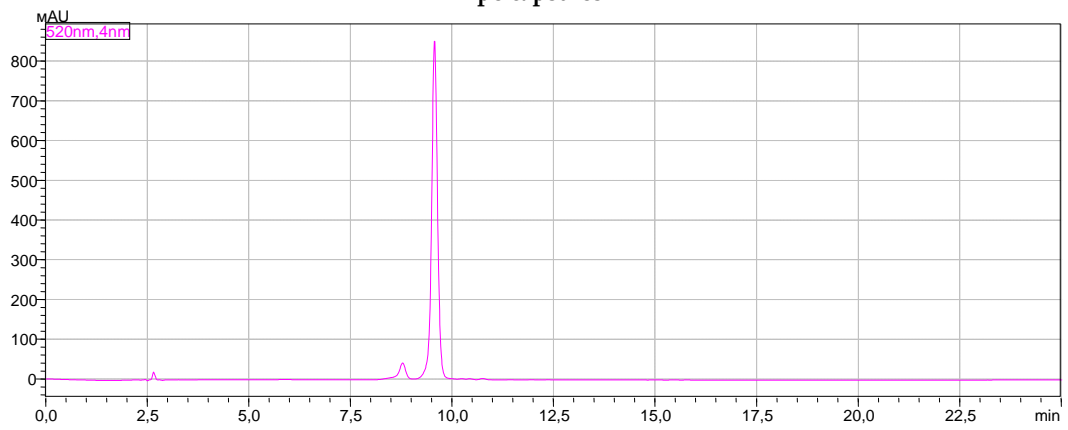

Supplement: Supplementary file 3 [file supplementary]
