# Supplementary material for: Light and Methyl Jasmonate Impact in the Biosynthesis of Anthocyanins and VLCFAs in the <em>Euonymus maximowiczianus</em> Aril-Derived Long-Term Suspension-Cultured Cells
Source: Preprints.org preprint supplement (doi:10.20944/preprints202309.0039.v2), 2023-12-11

# Light and Methyl Jasmonate Impact in the Biosynthesis of Anthocyanins and VLCFAs in the *Euonymus maximowiczianus* Aril-Derived Long-Term Suspension-Cultured Cells

## Supplementary Materials:

Figure S4. Total ion current chromatograms of GC-MS separation of FA methyl esters obtained from total lipids of the control and MeJa-treated suspension cell cultures. Em-L – under-light-grown suspension cell culture of *Euonymus maximowiczianus*; Em-D – dark-grown suspension cell culture of *Euonymus maximowiczianus*. For corresponding retention times (min) to FA molecular species, see Figure 11 in the main text.

### Em-L, 7th day

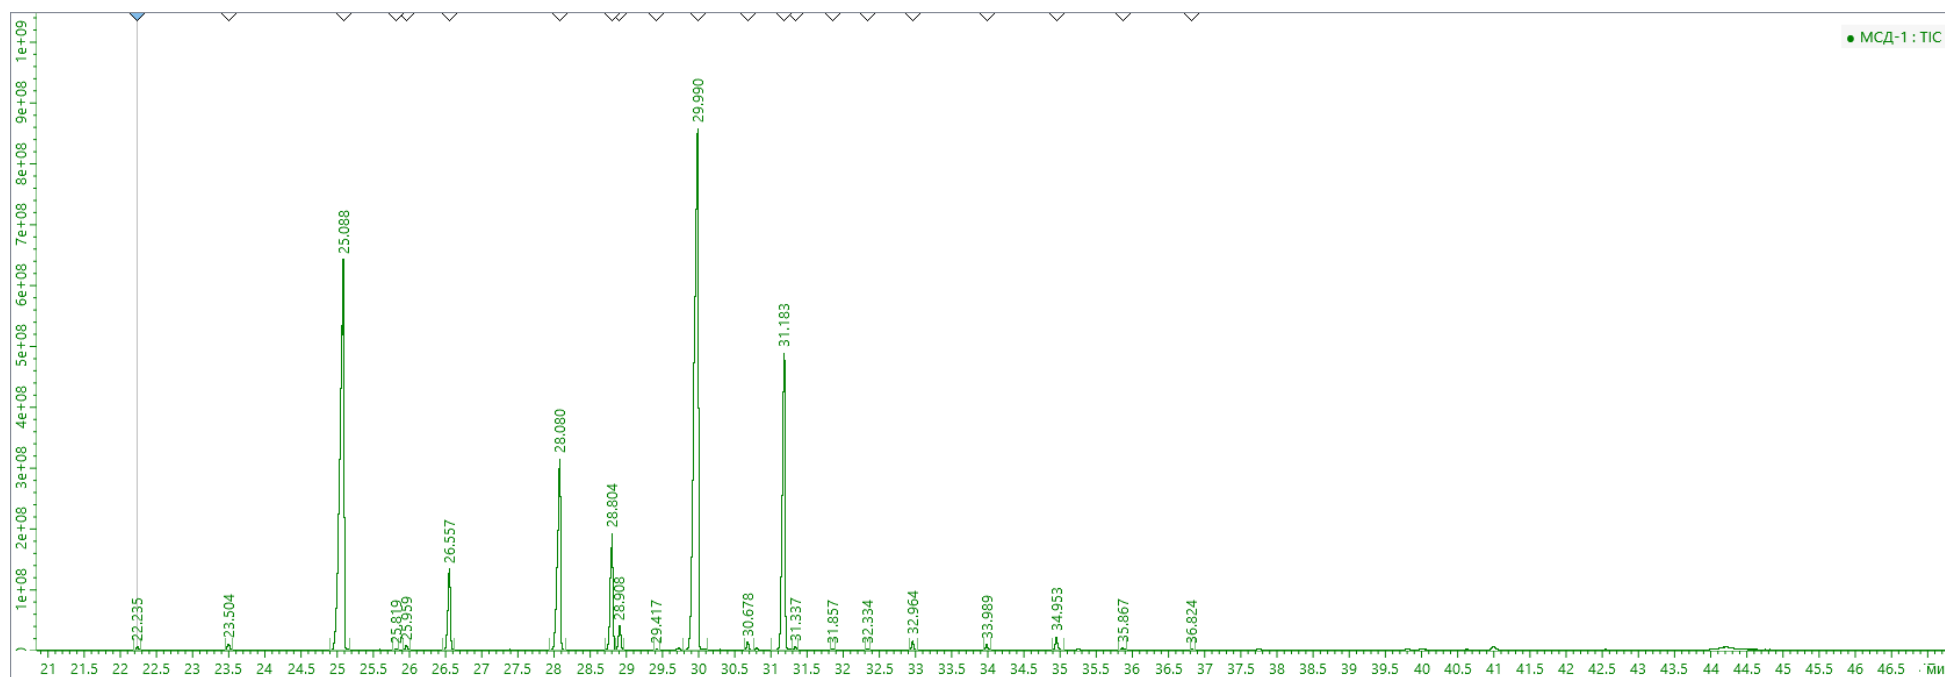

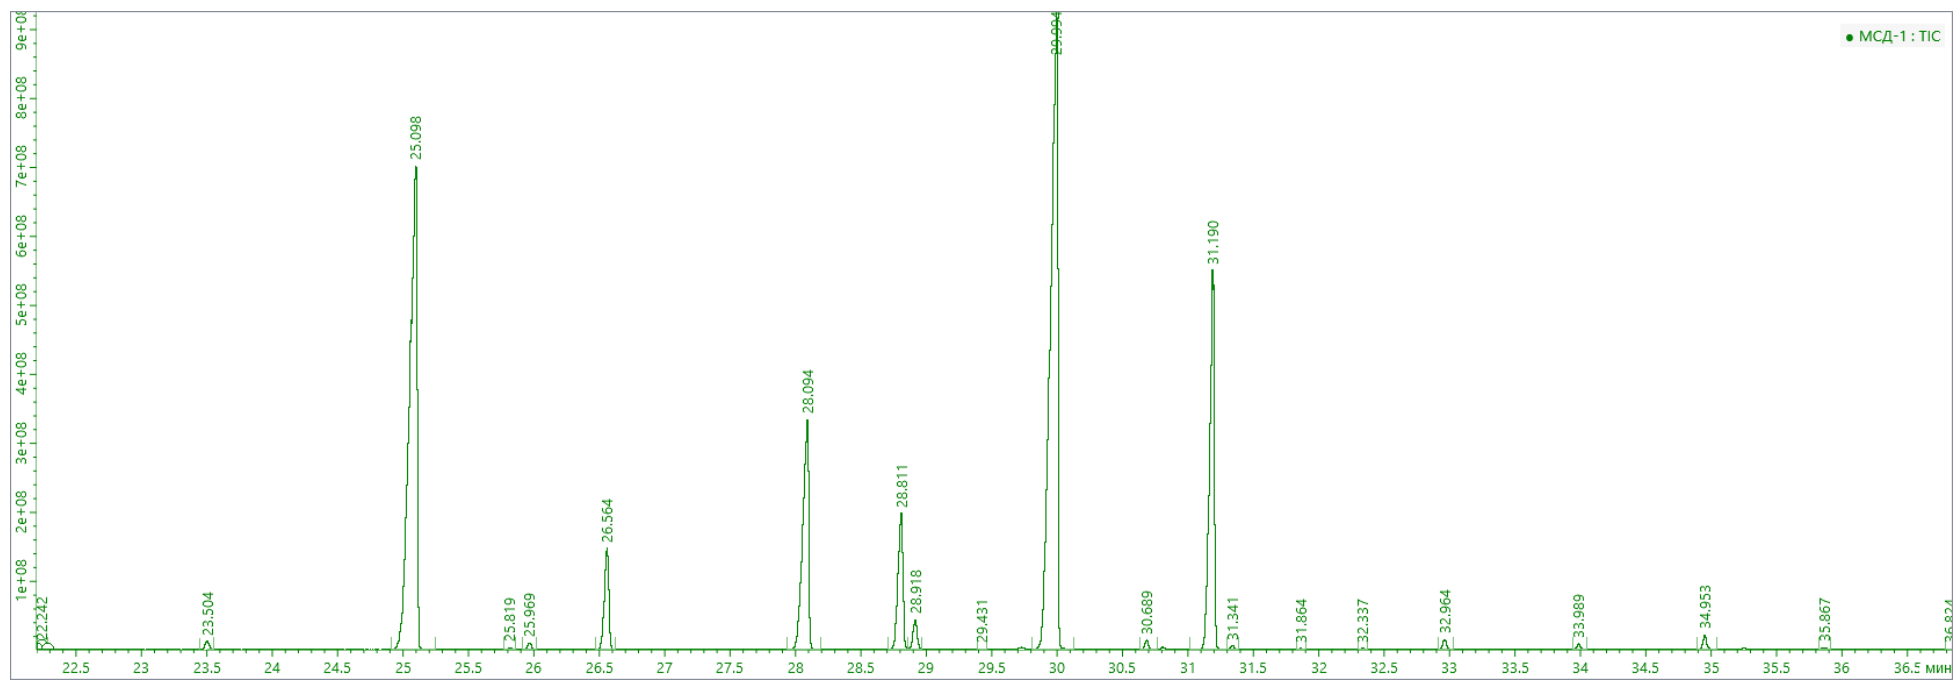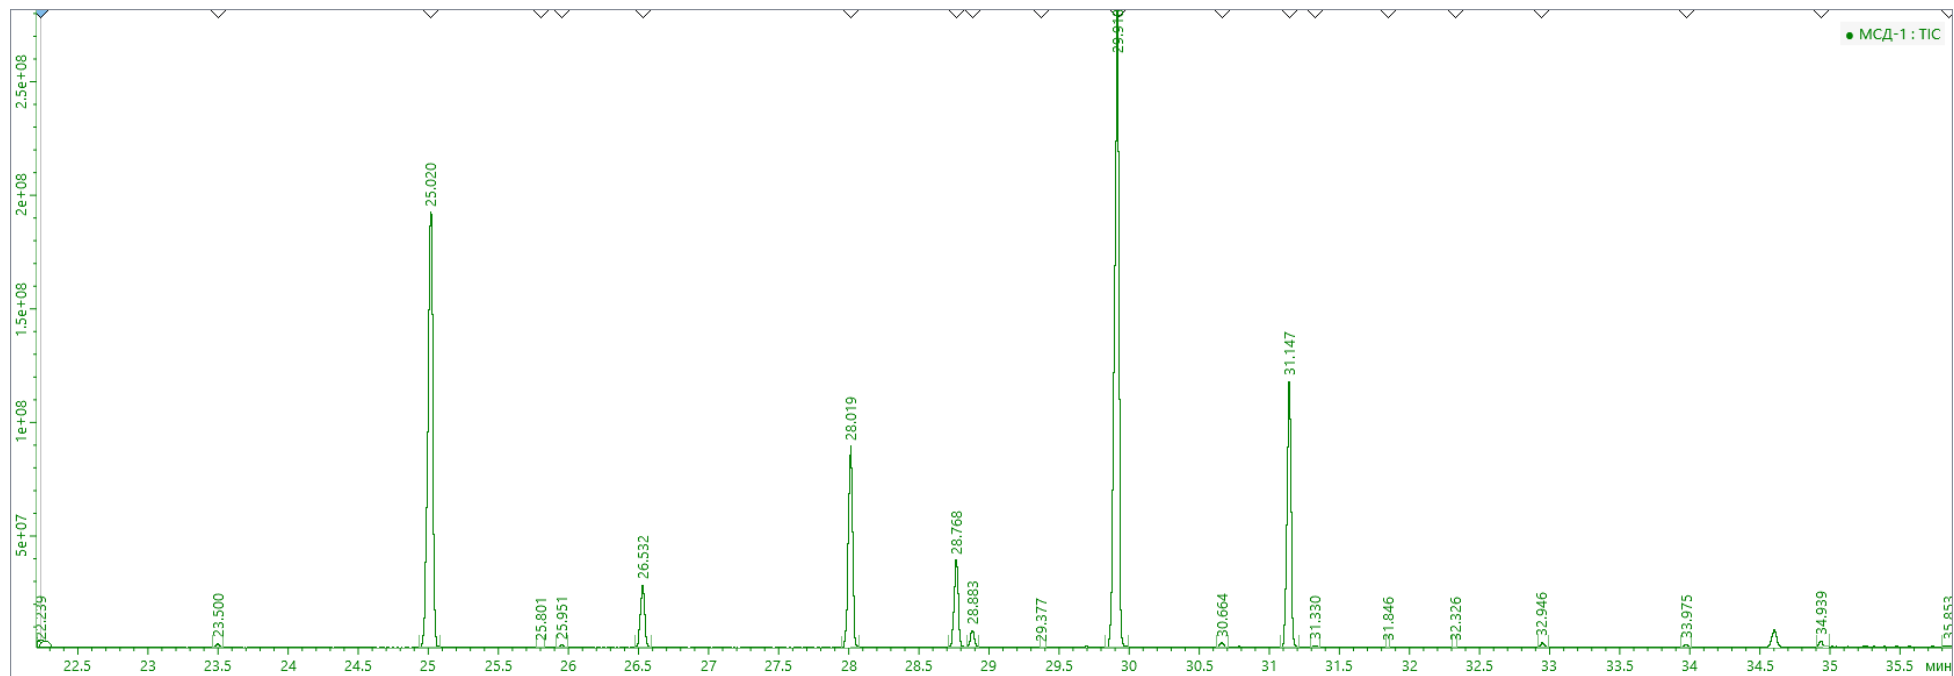

Em-L, 11th day

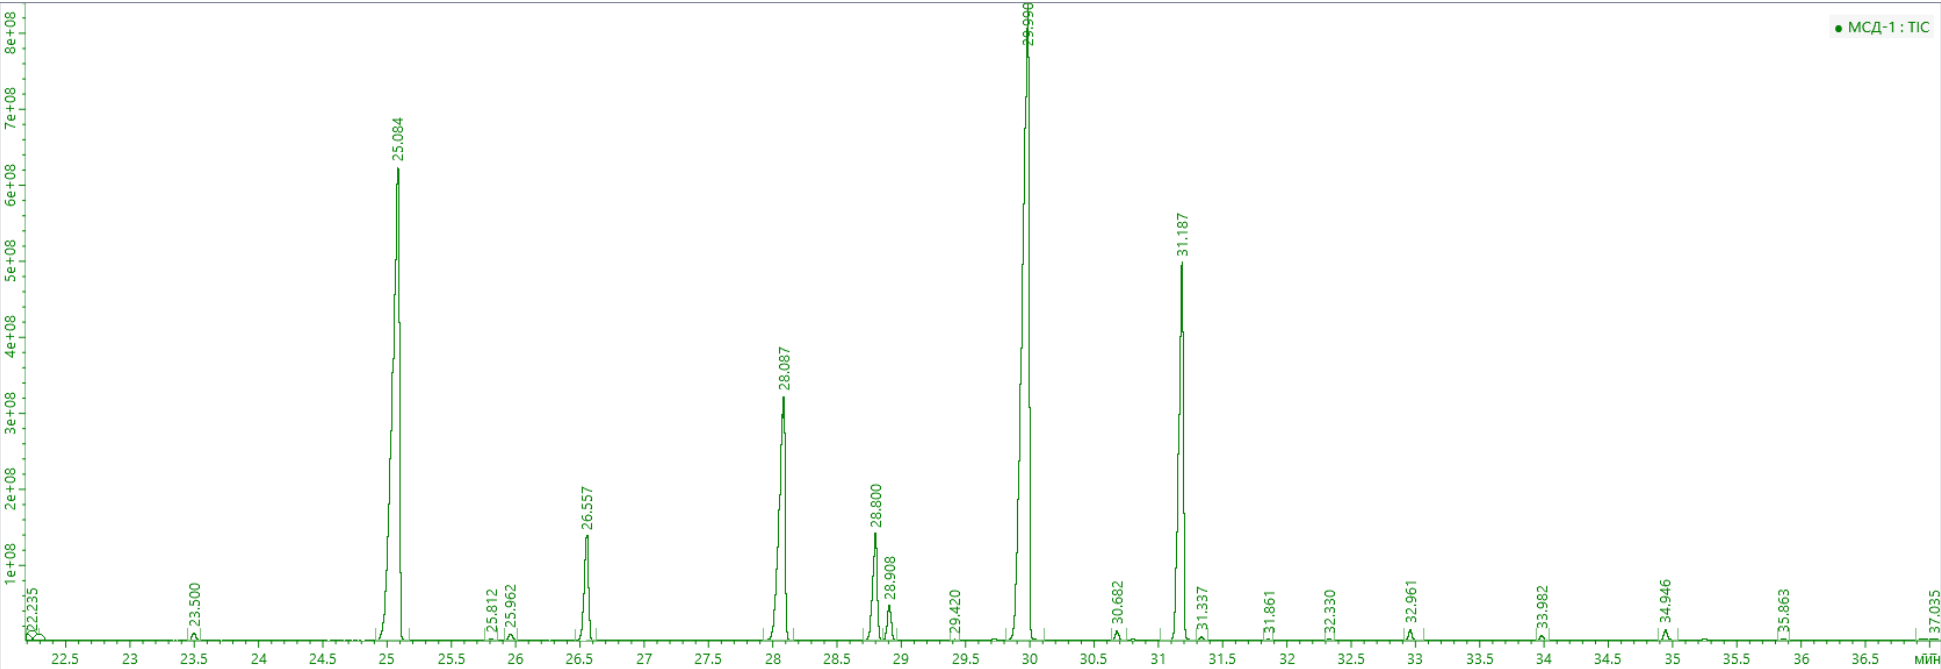

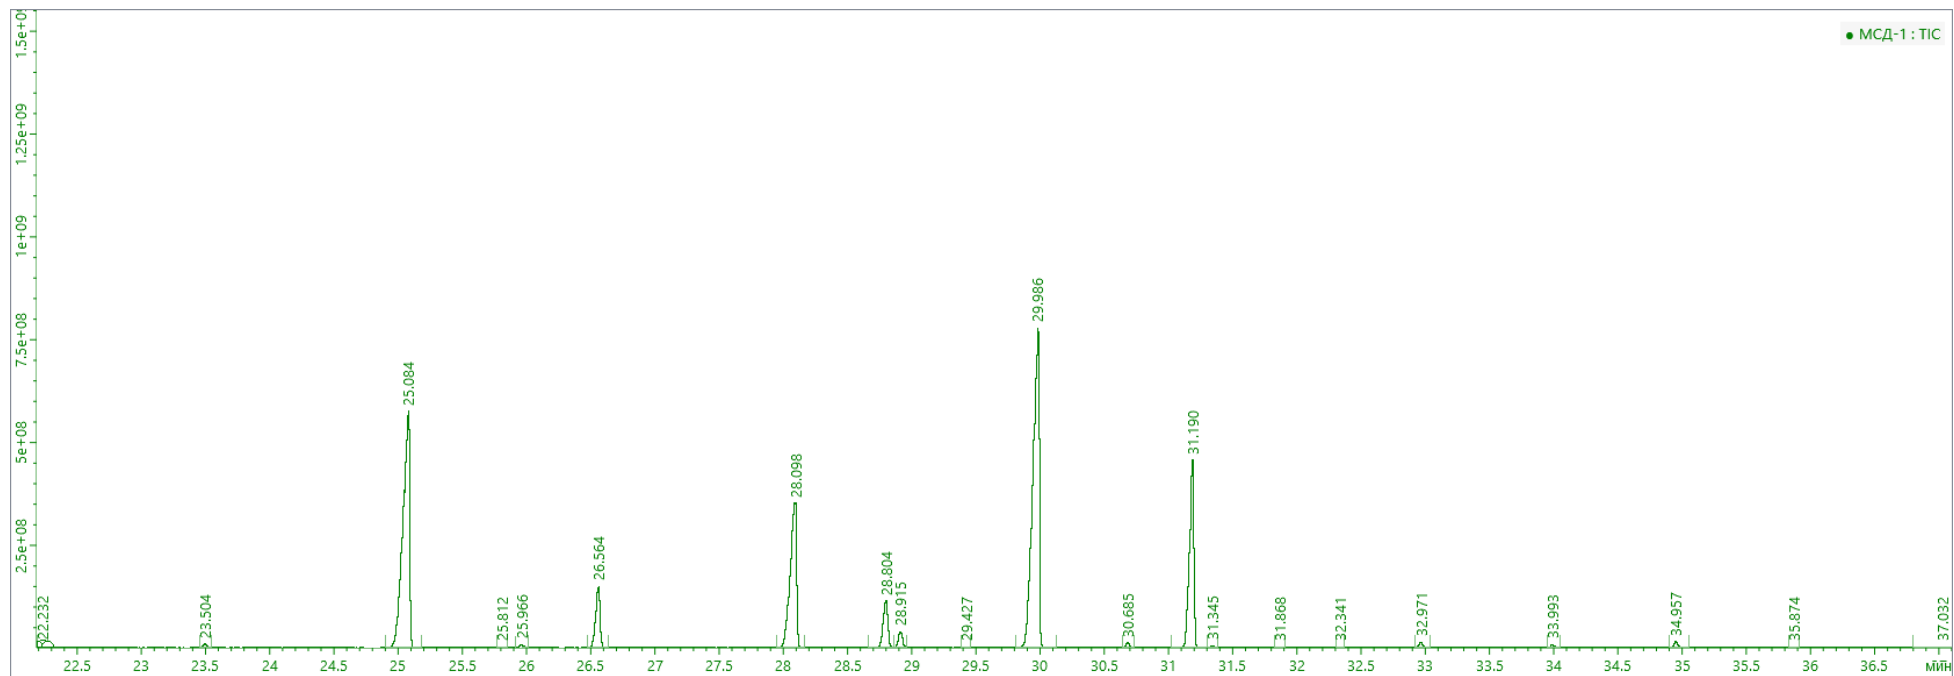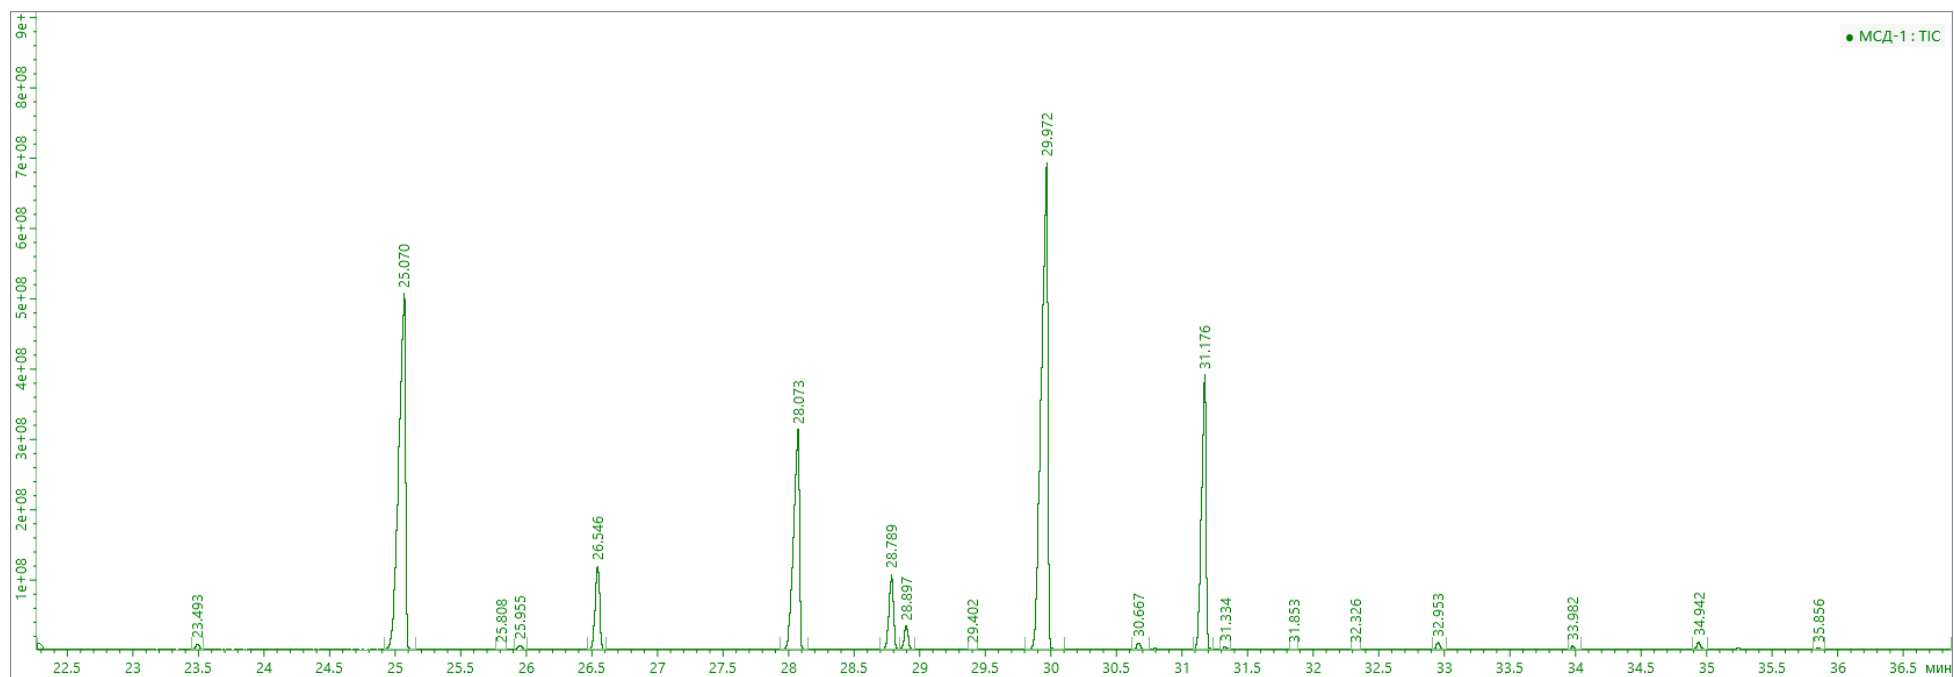

# Em-L, 14th day (control, 6 reps)

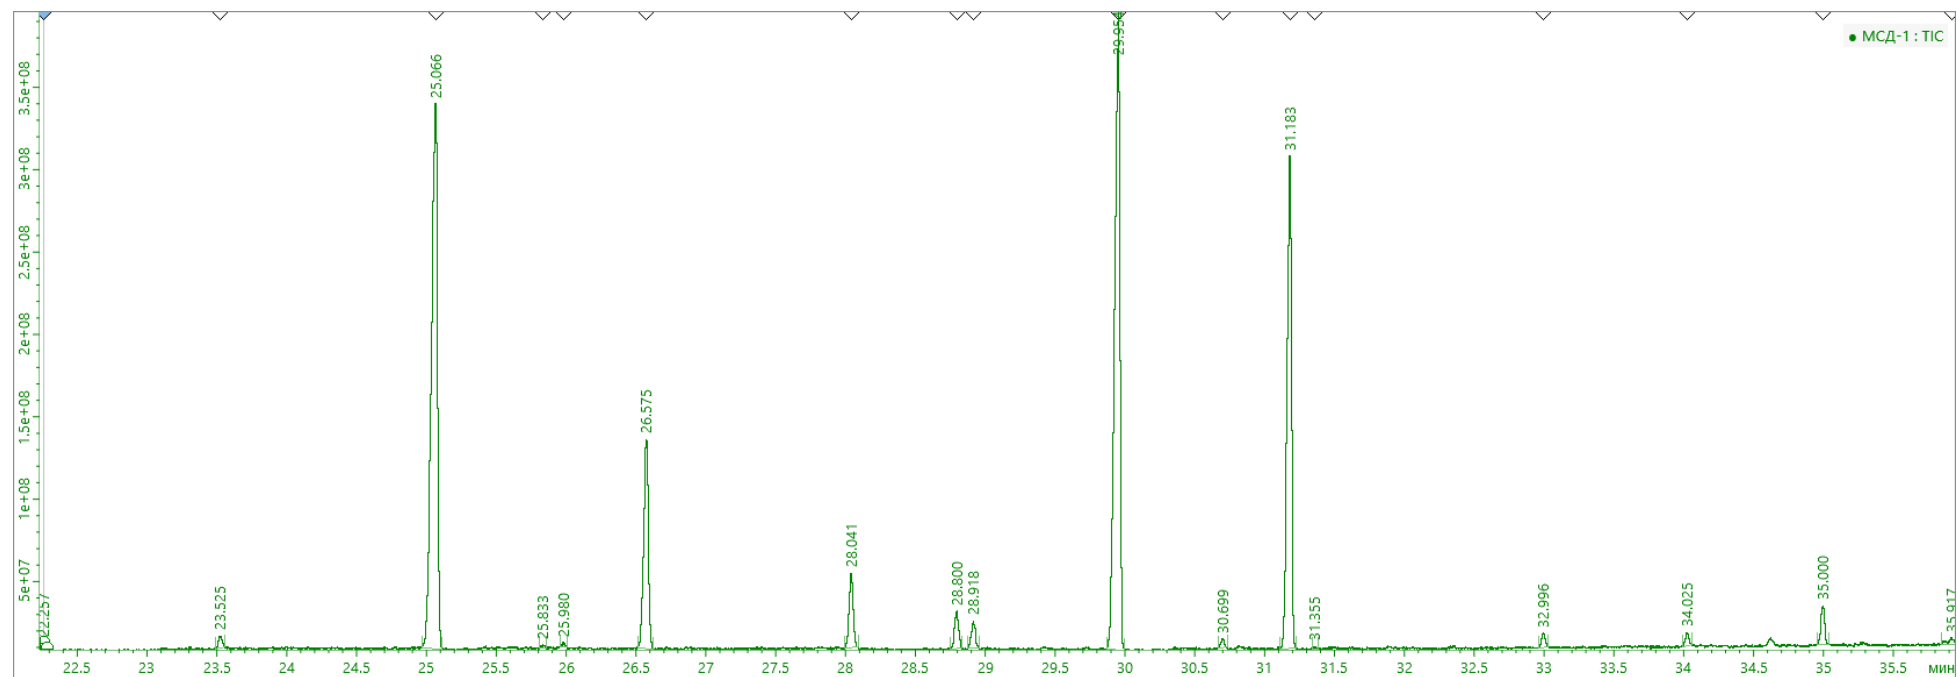

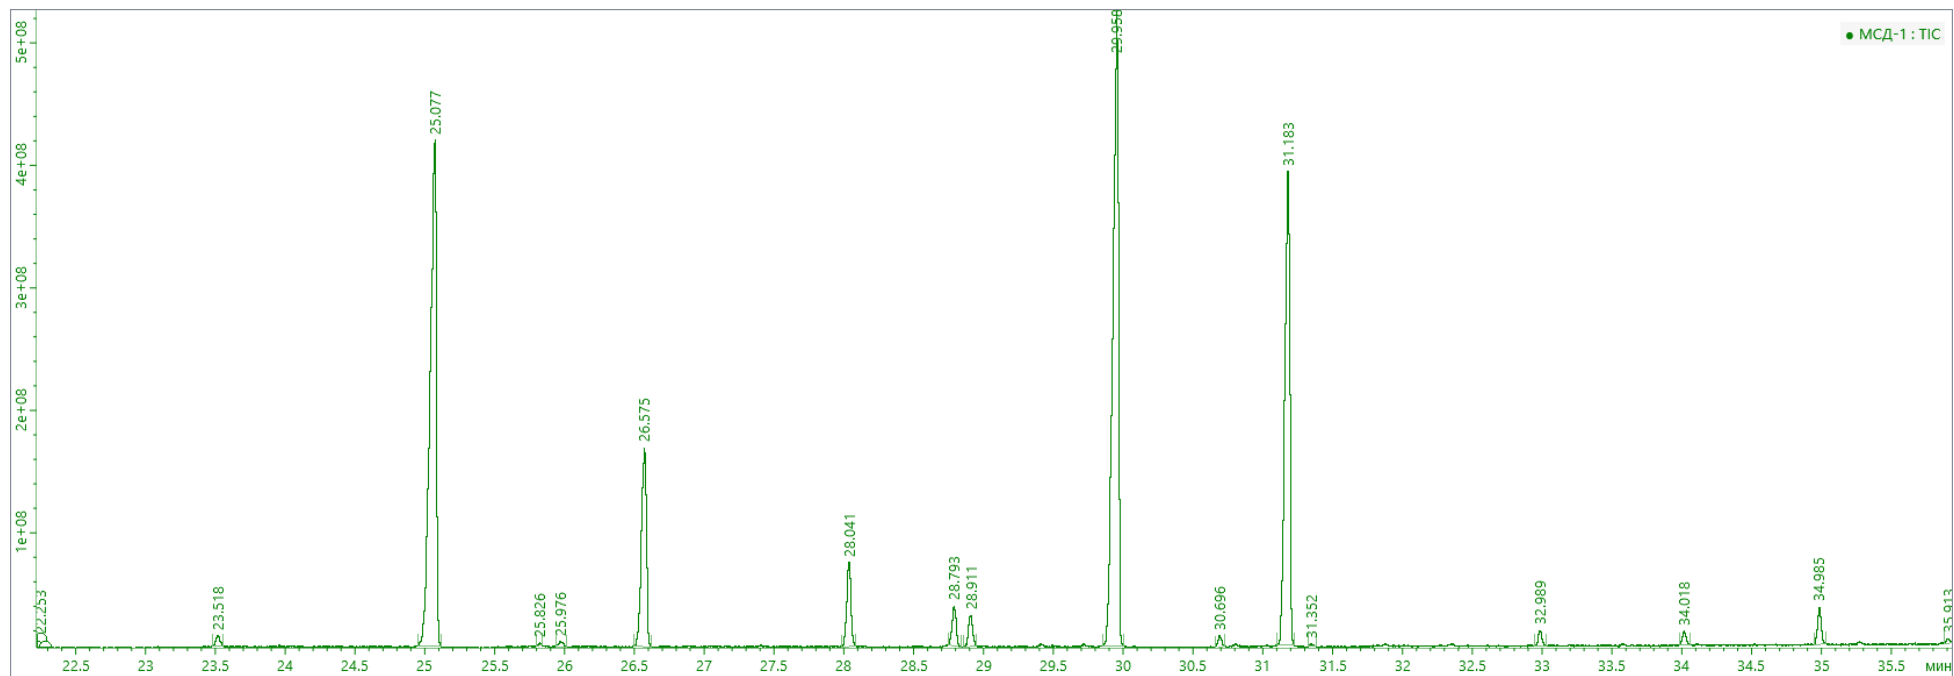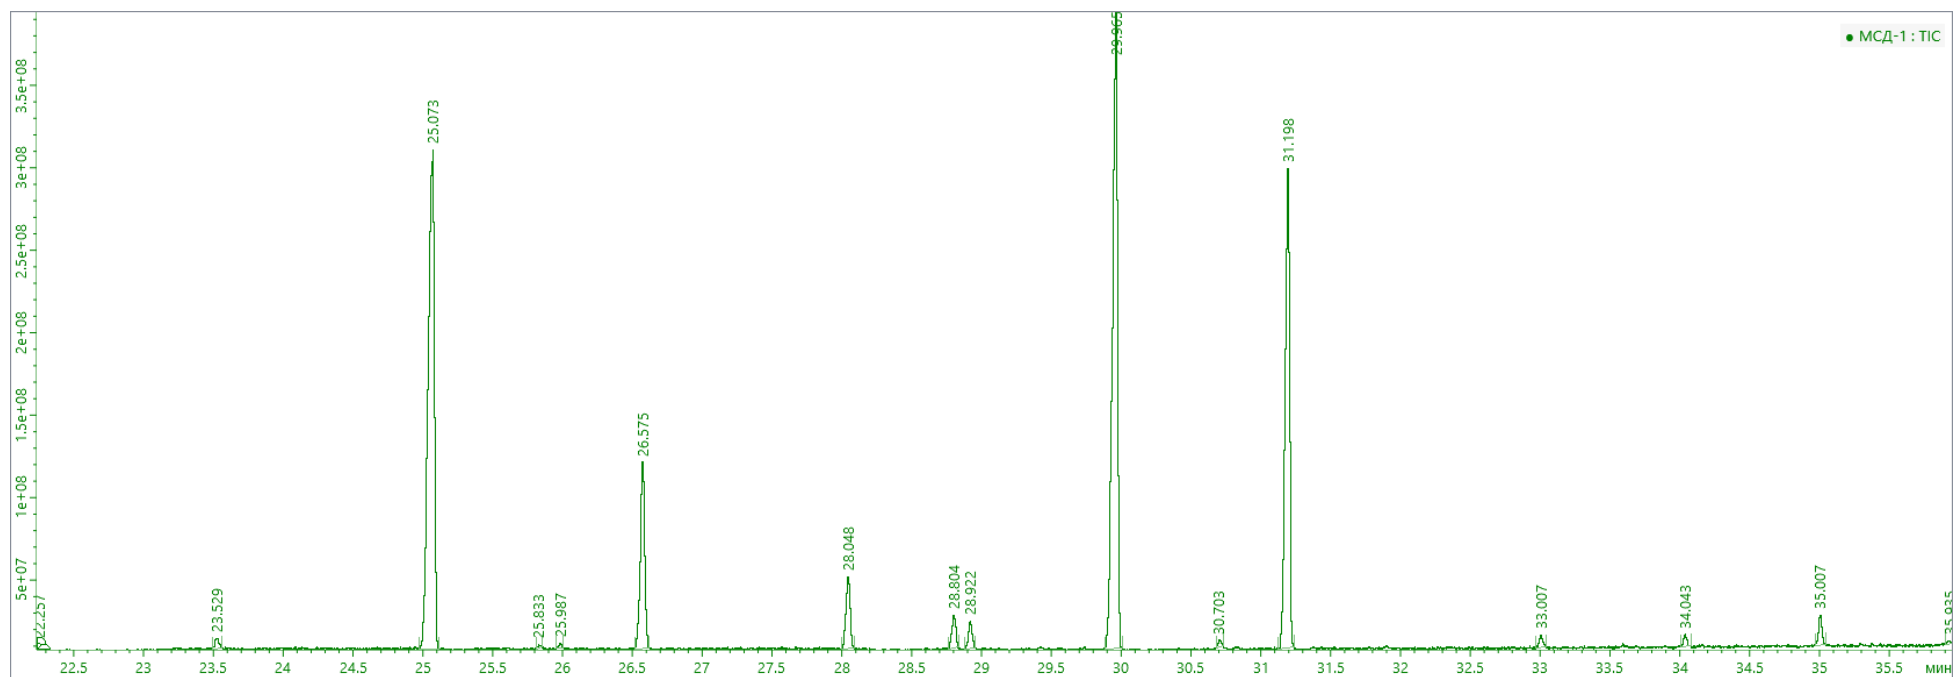

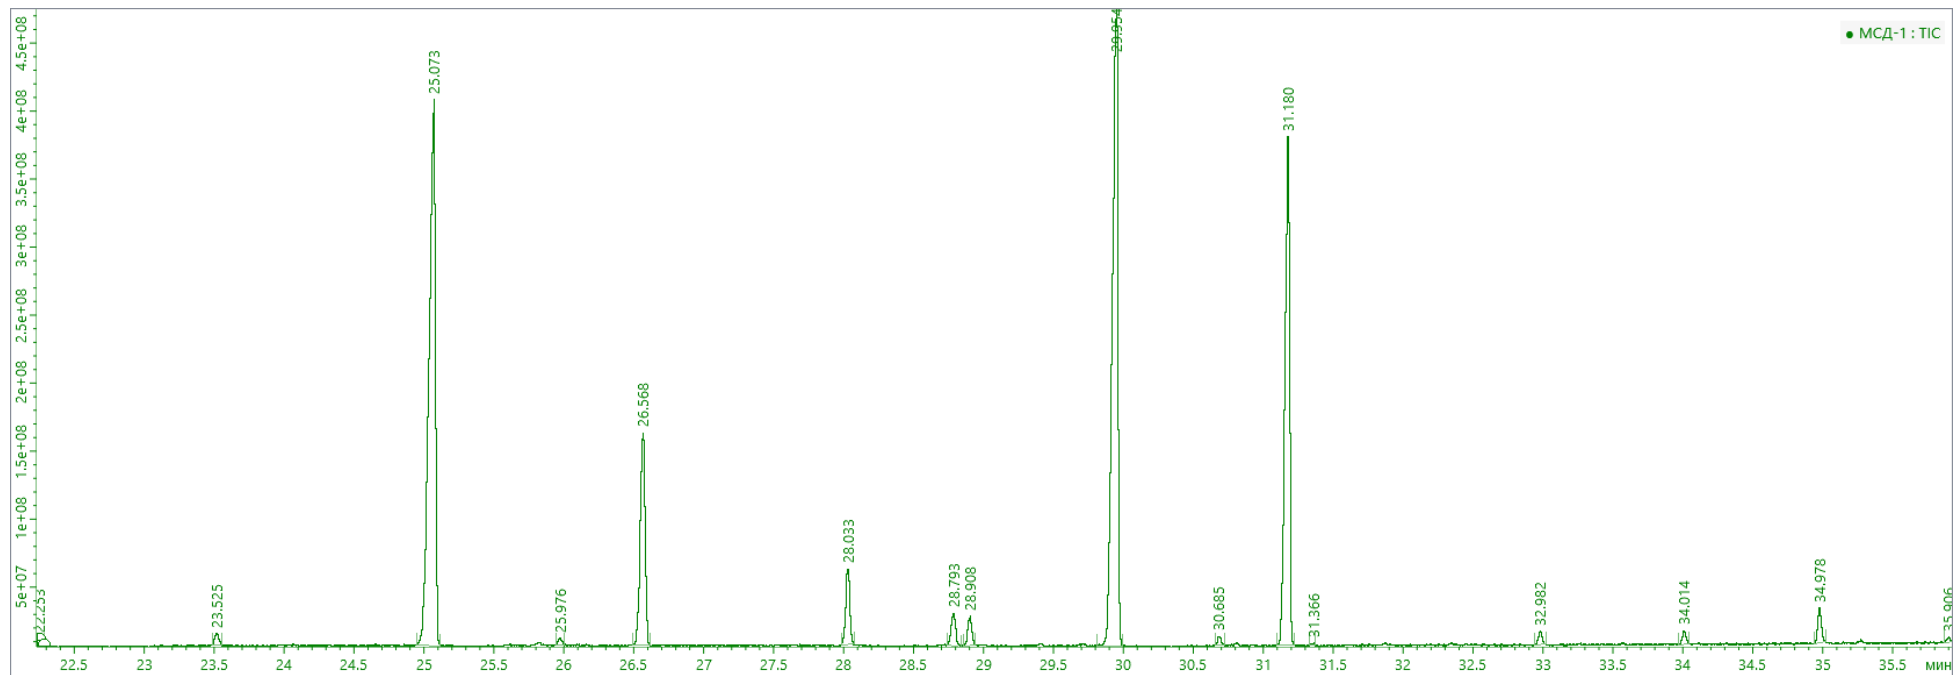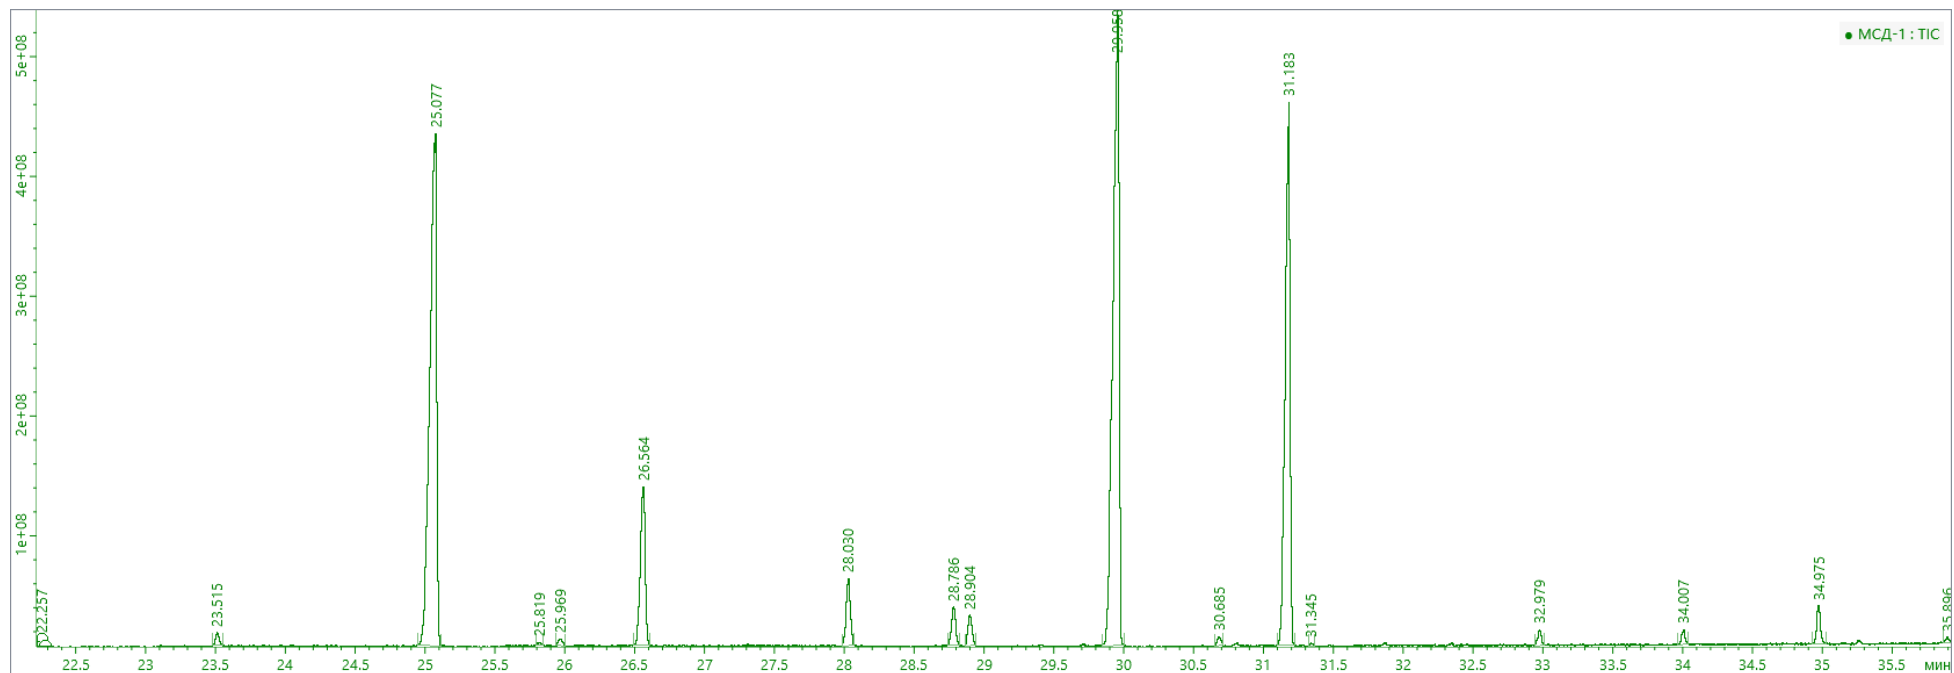

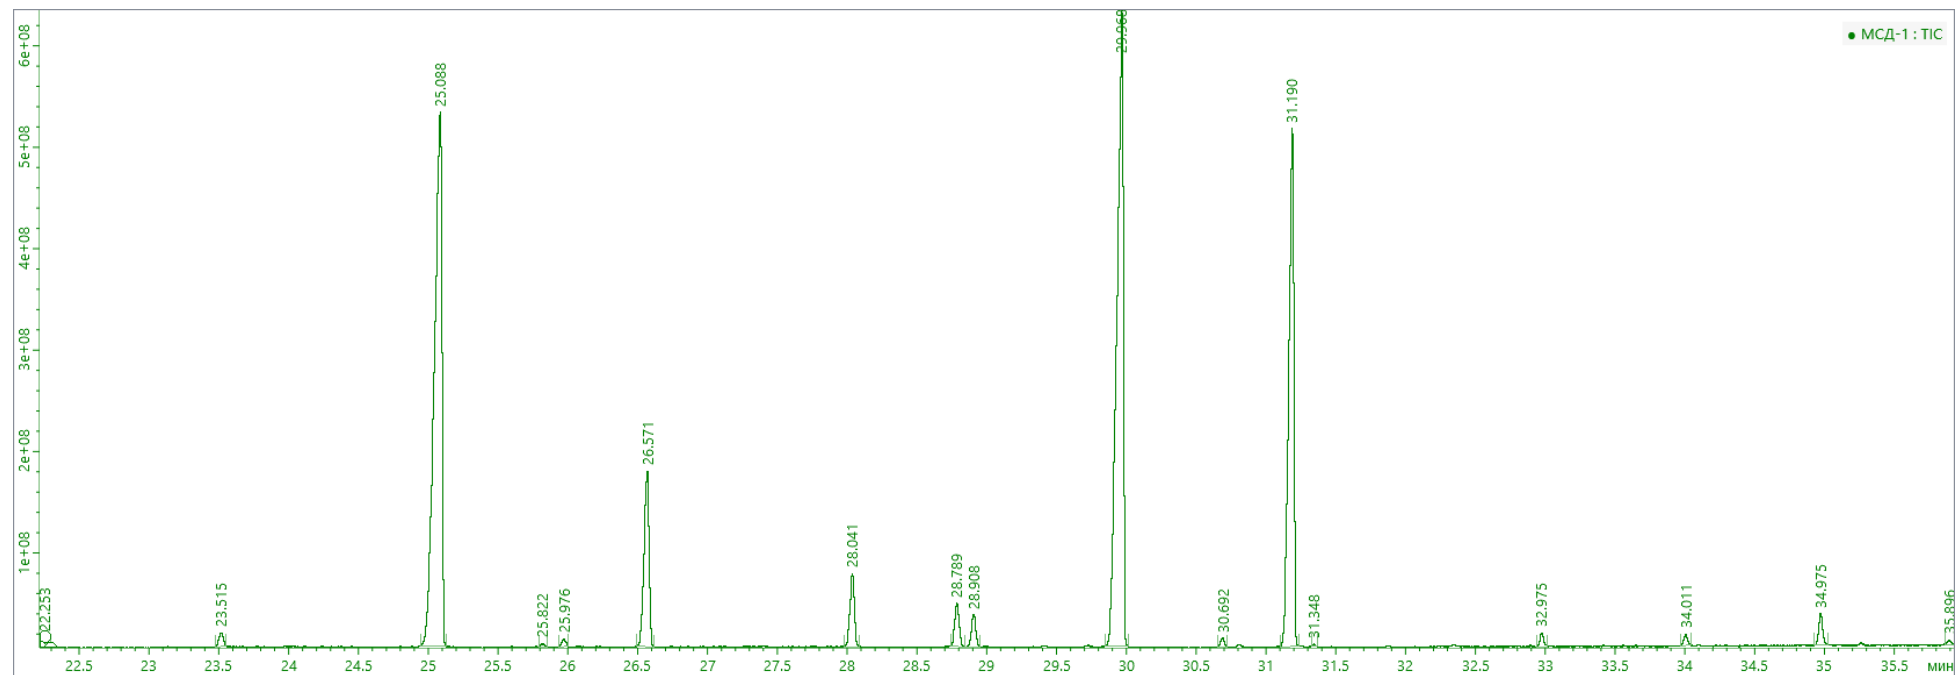



# Em-L, 21st day

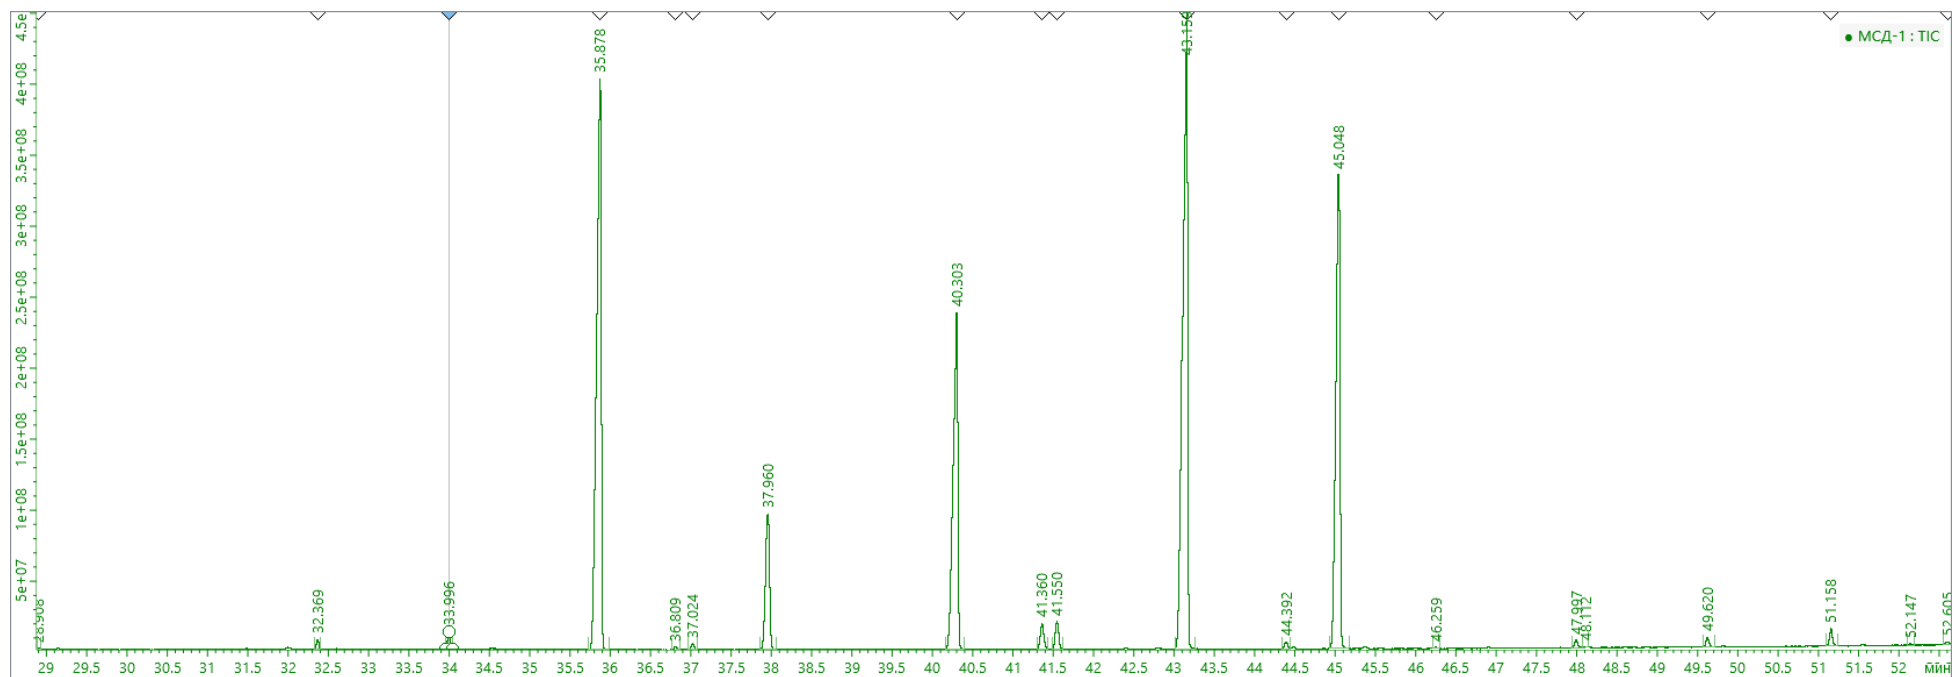

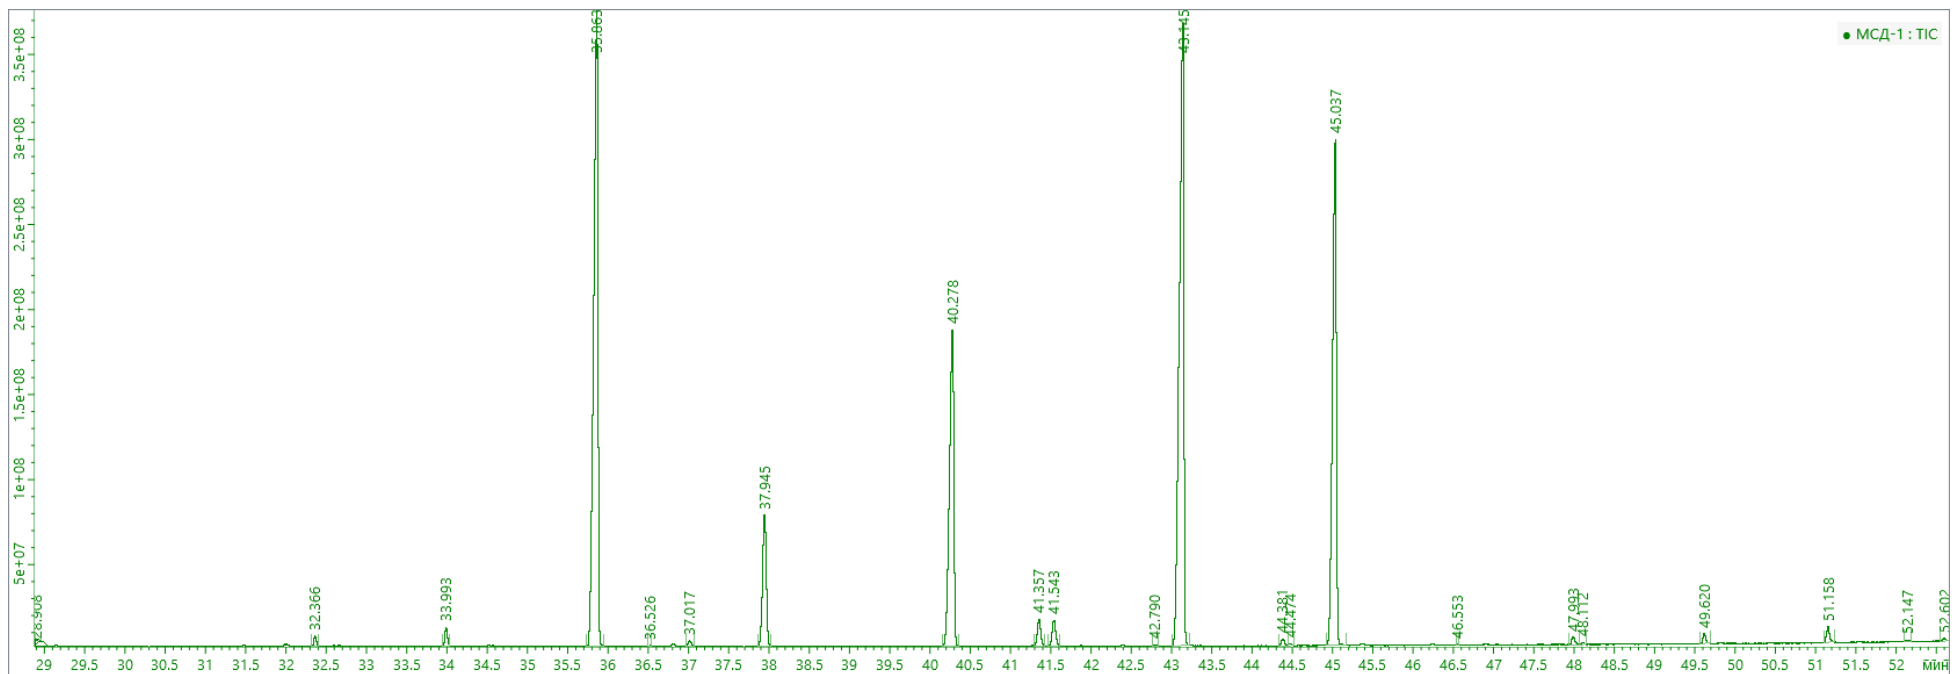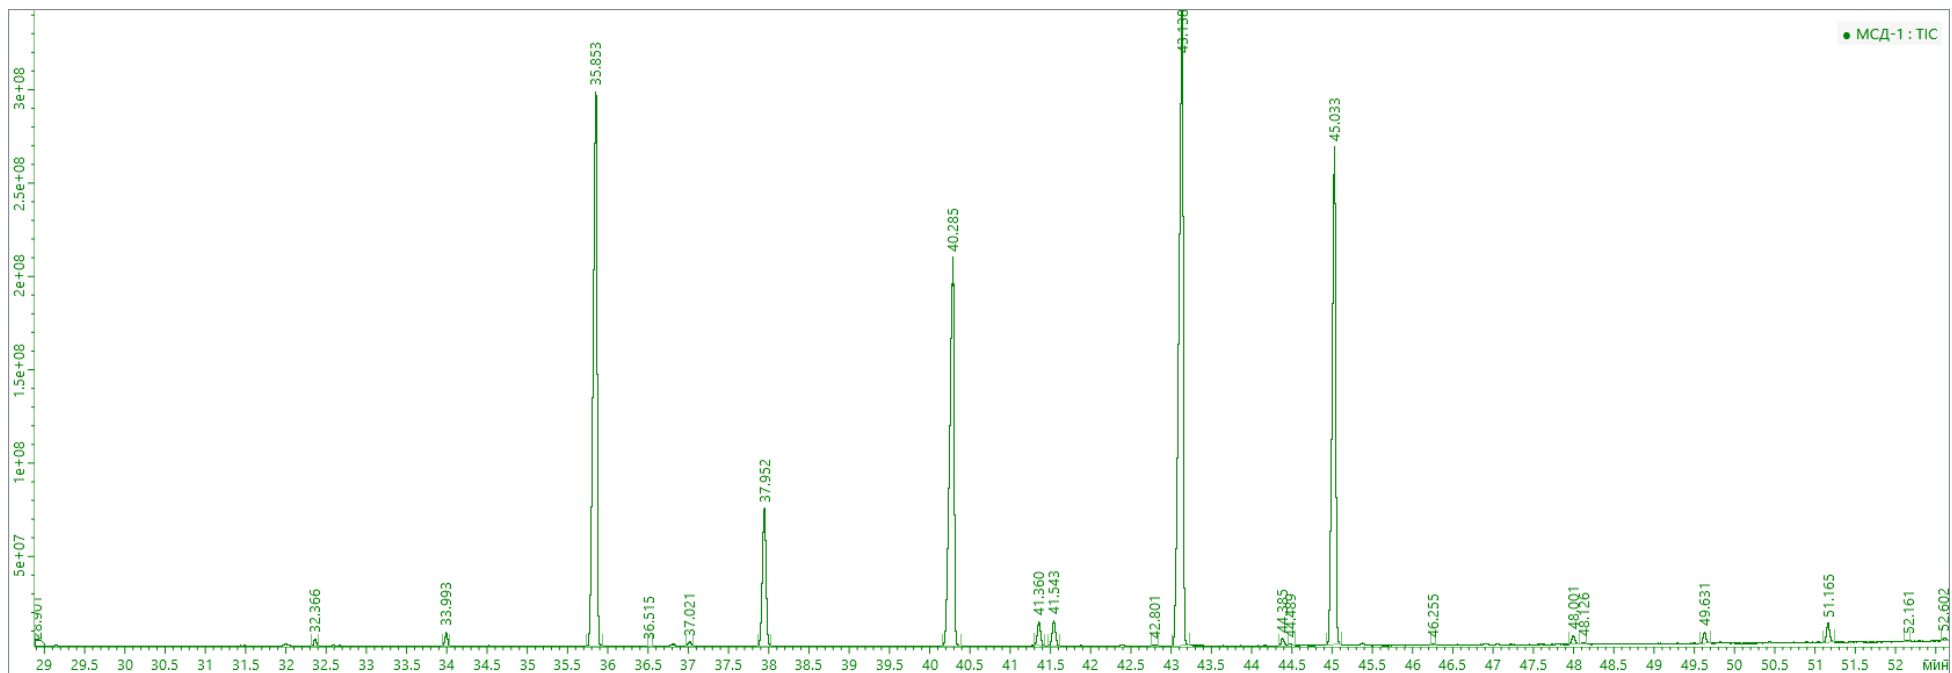

# Em-L, 31st day

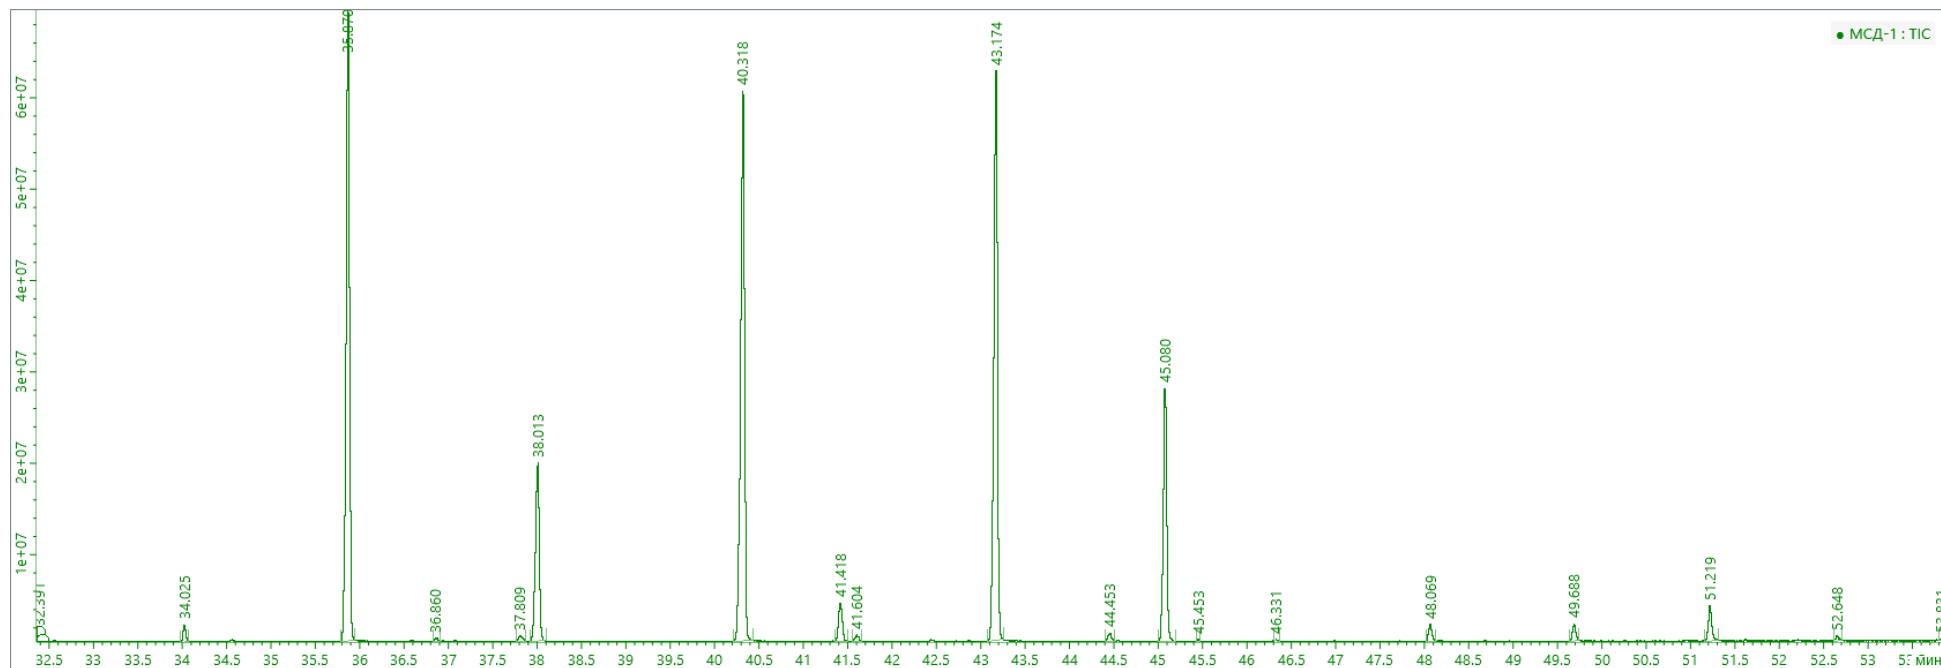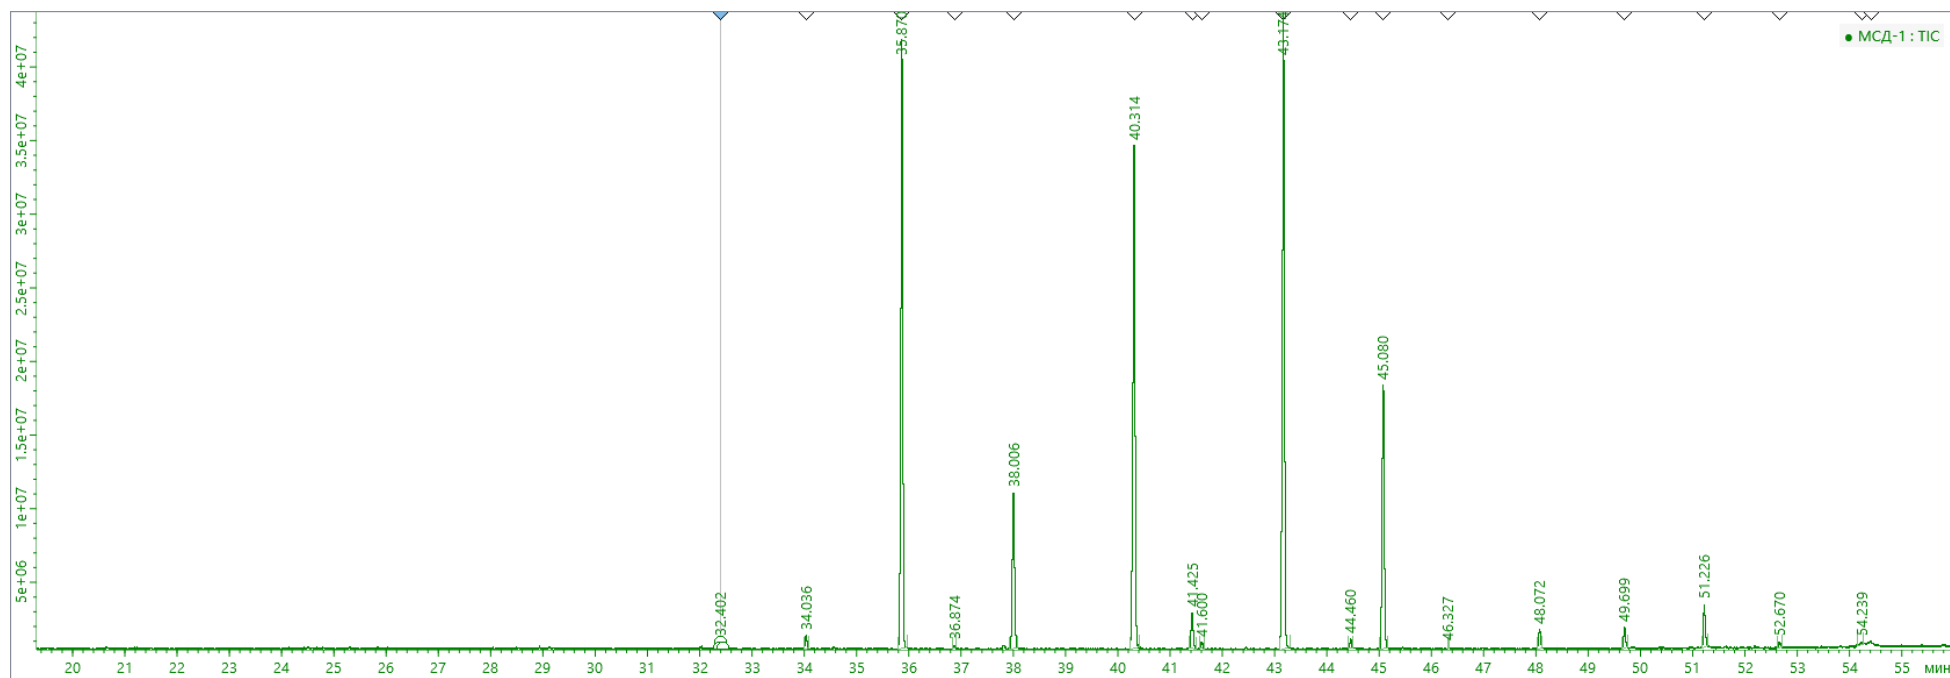

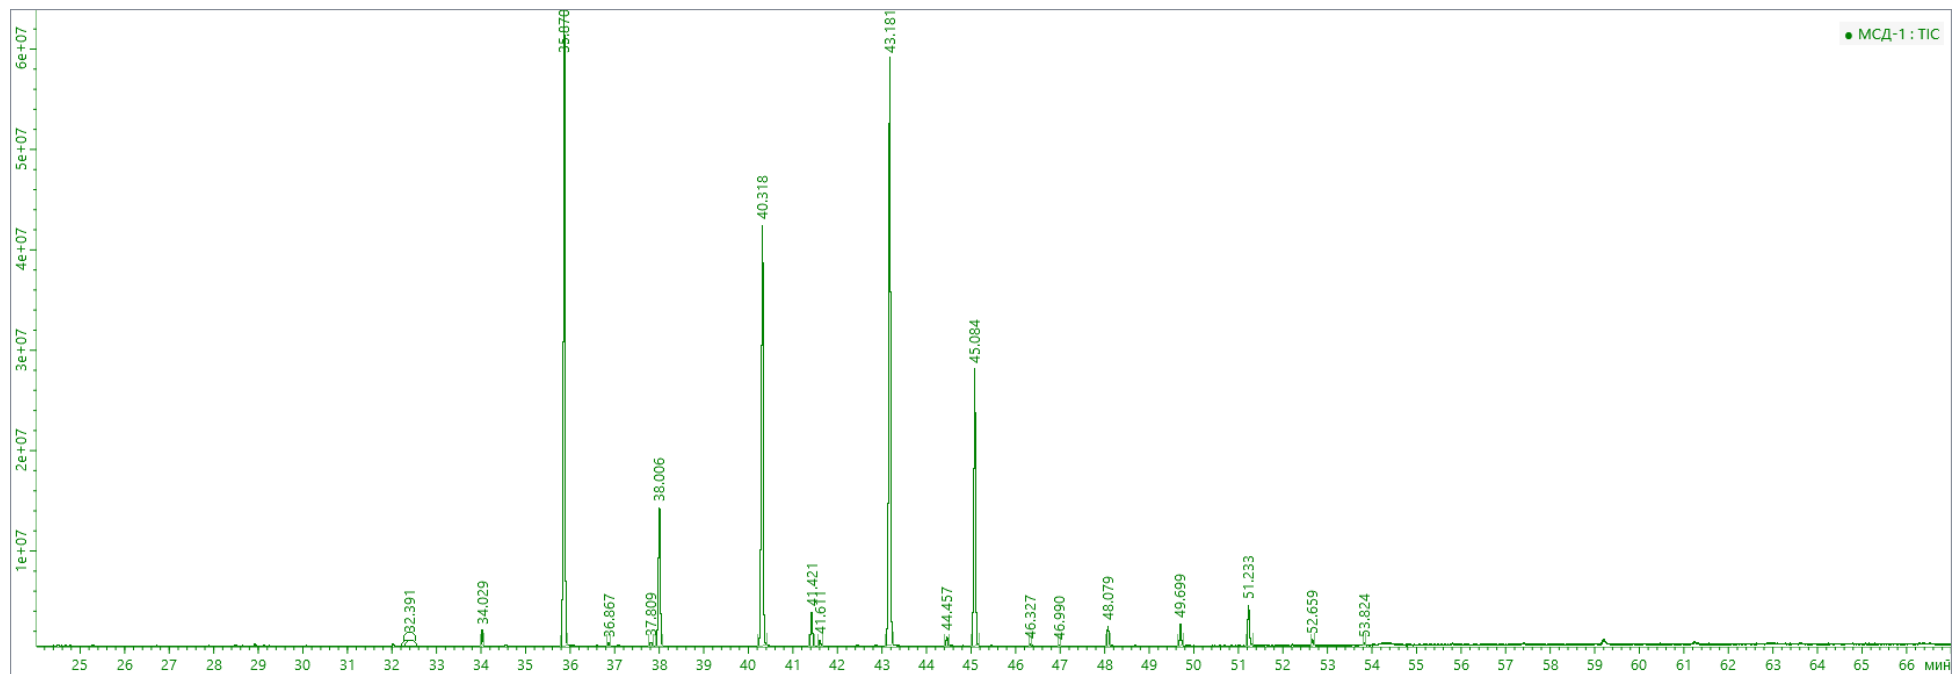

# Em-L + MeJa (6 reps)

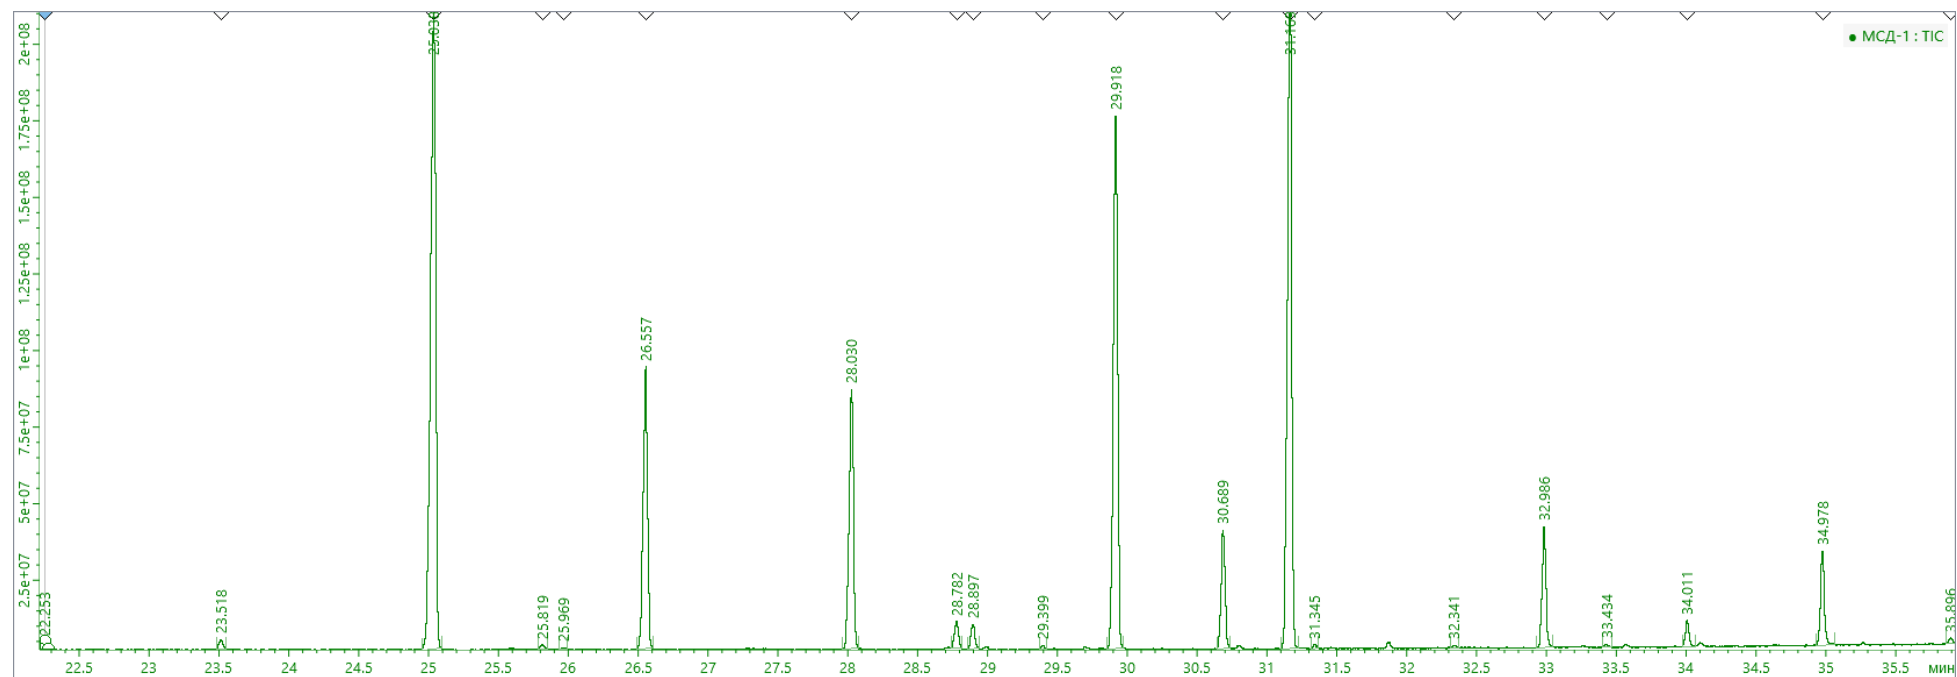

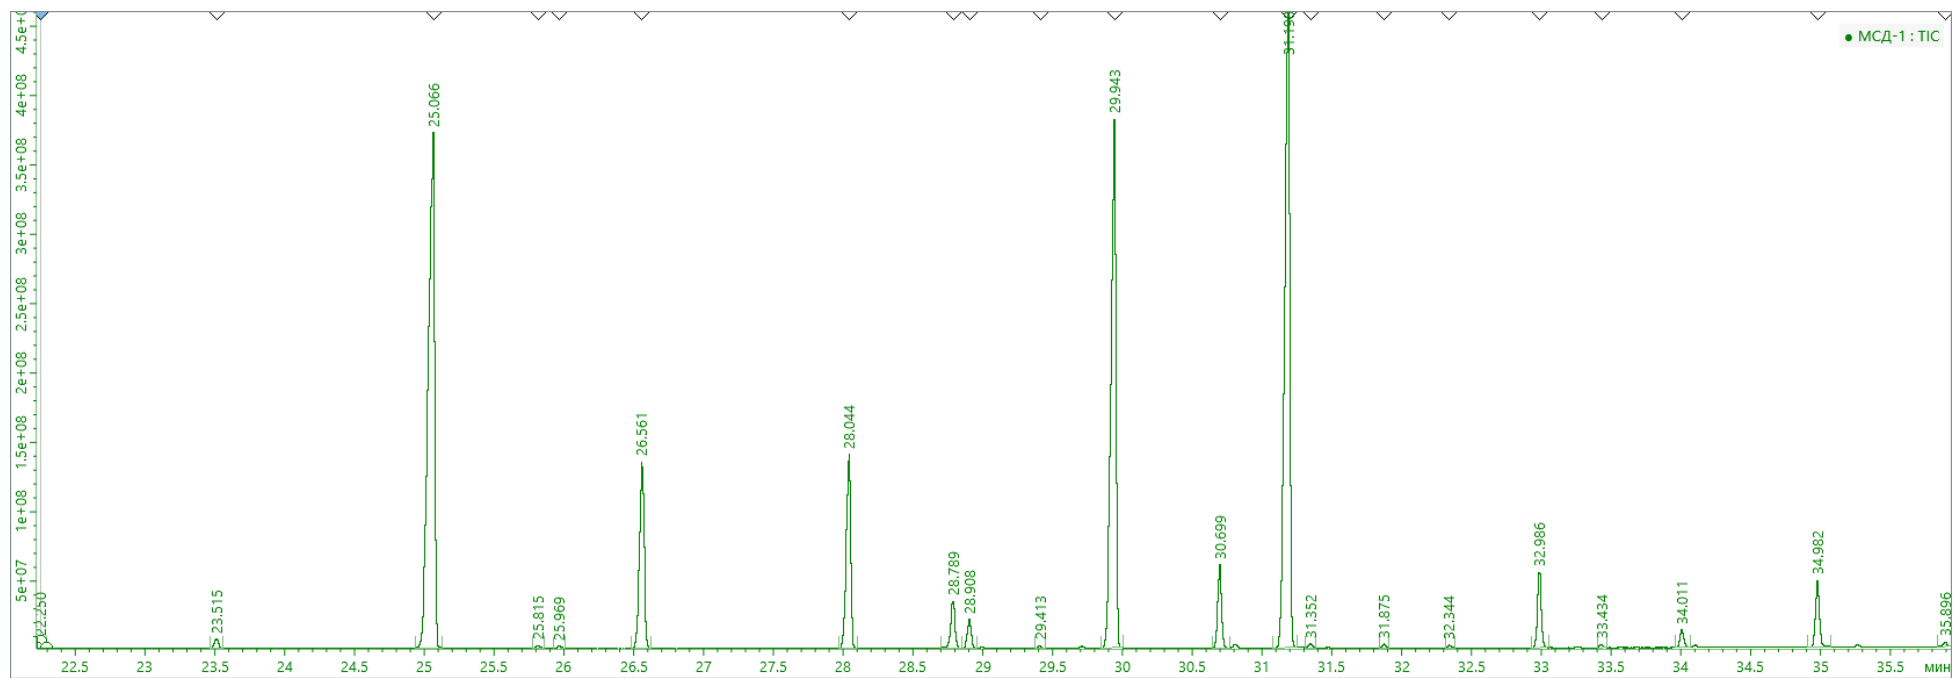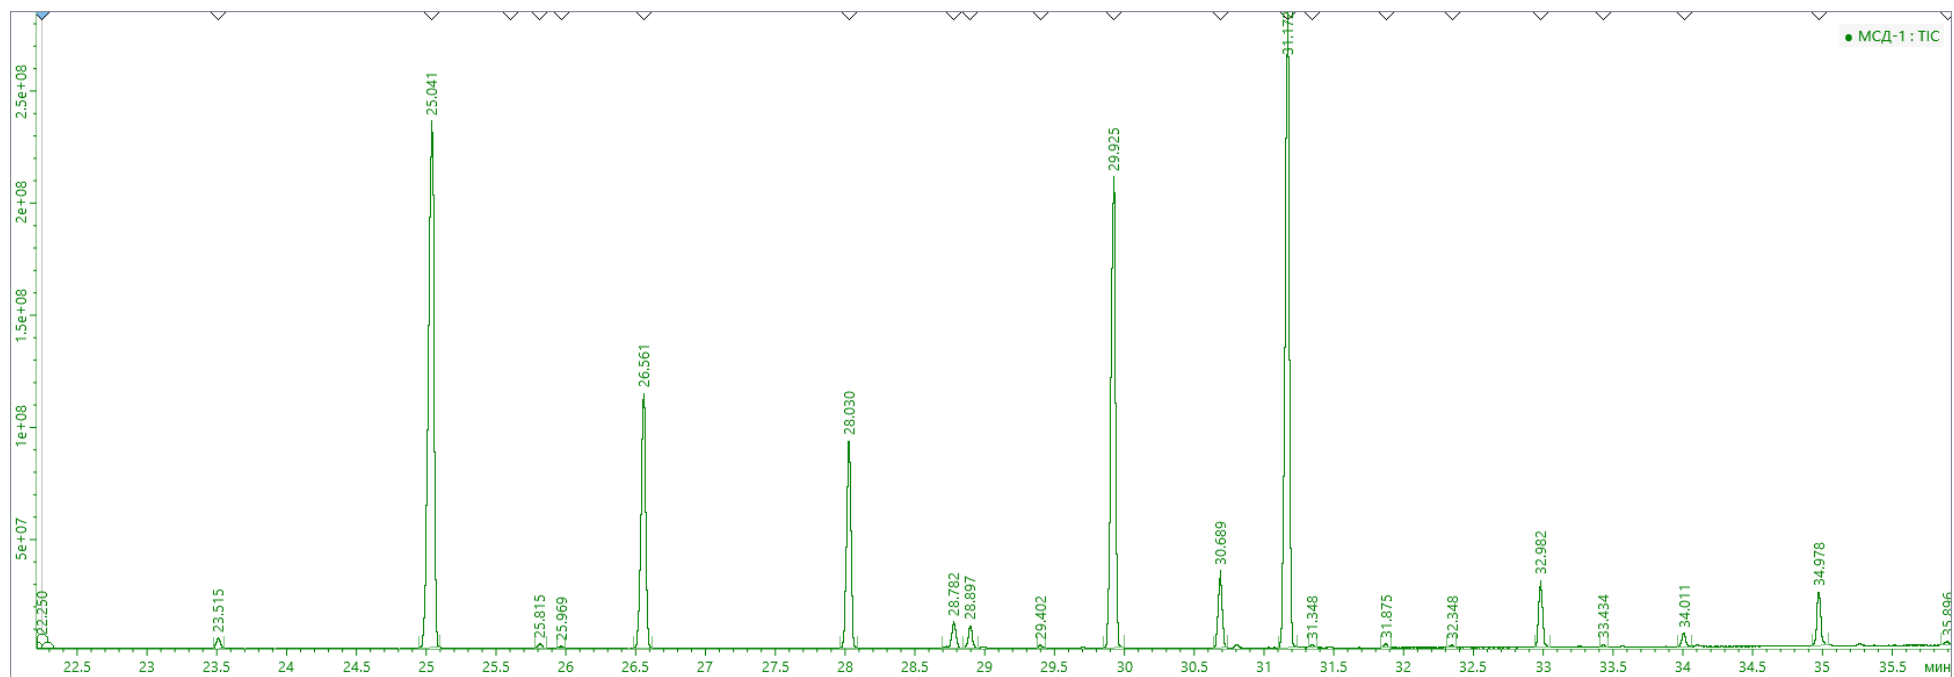

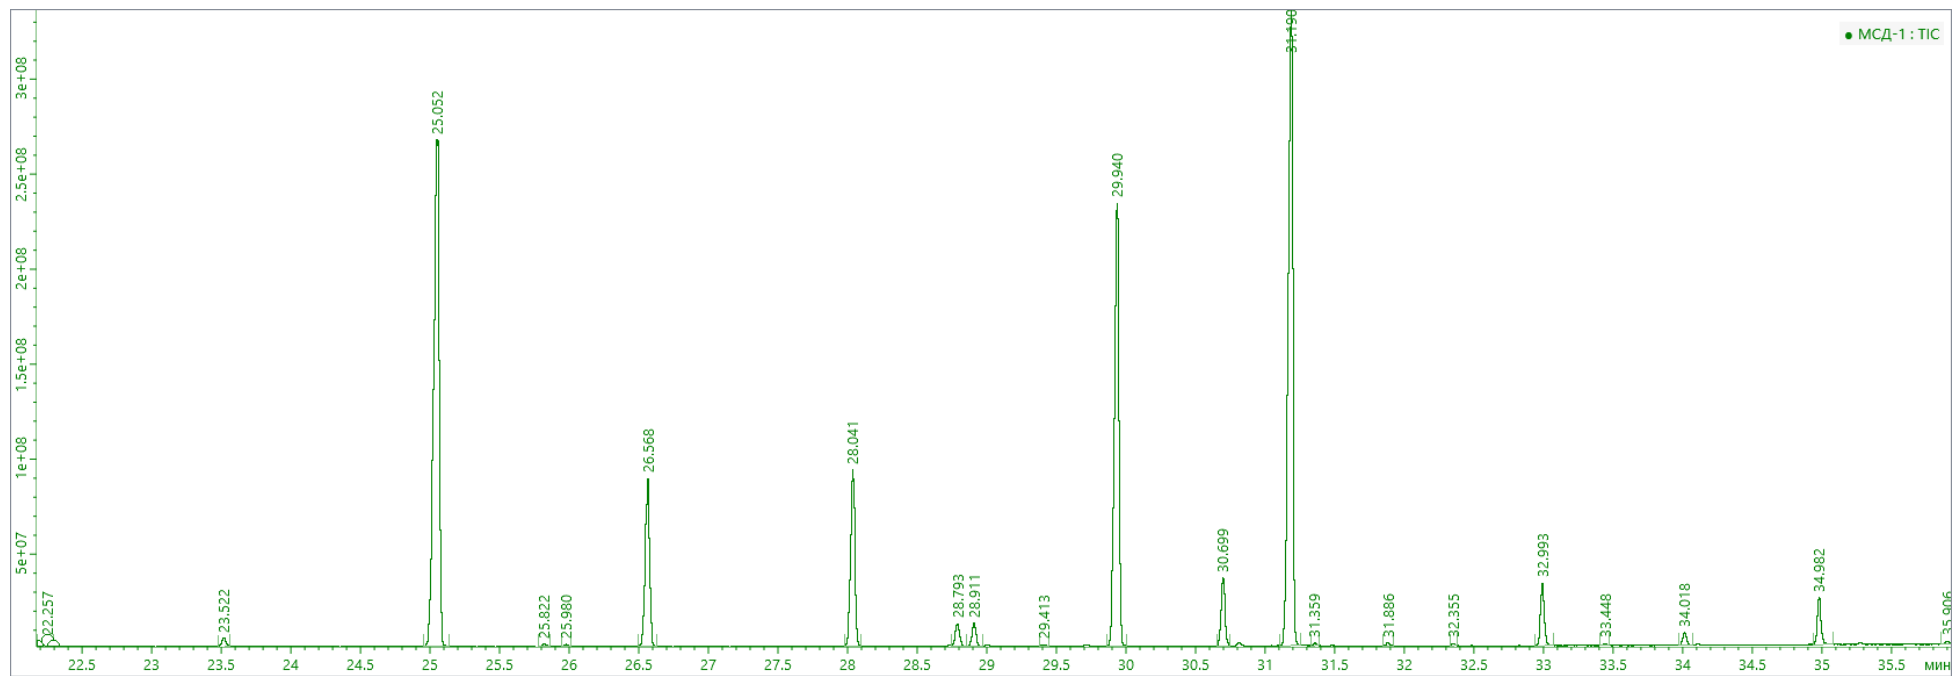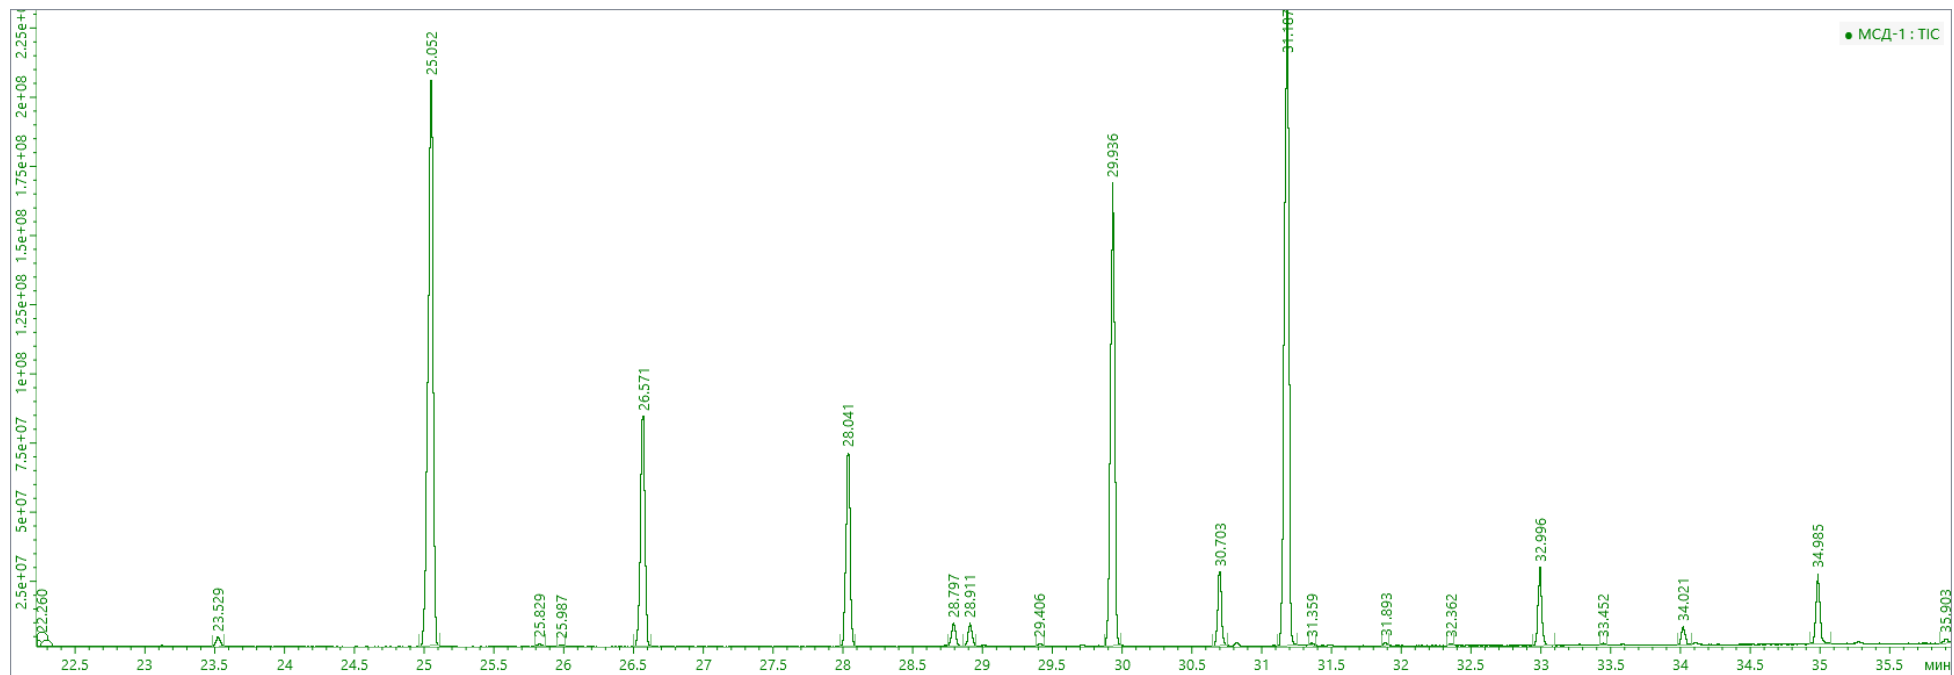

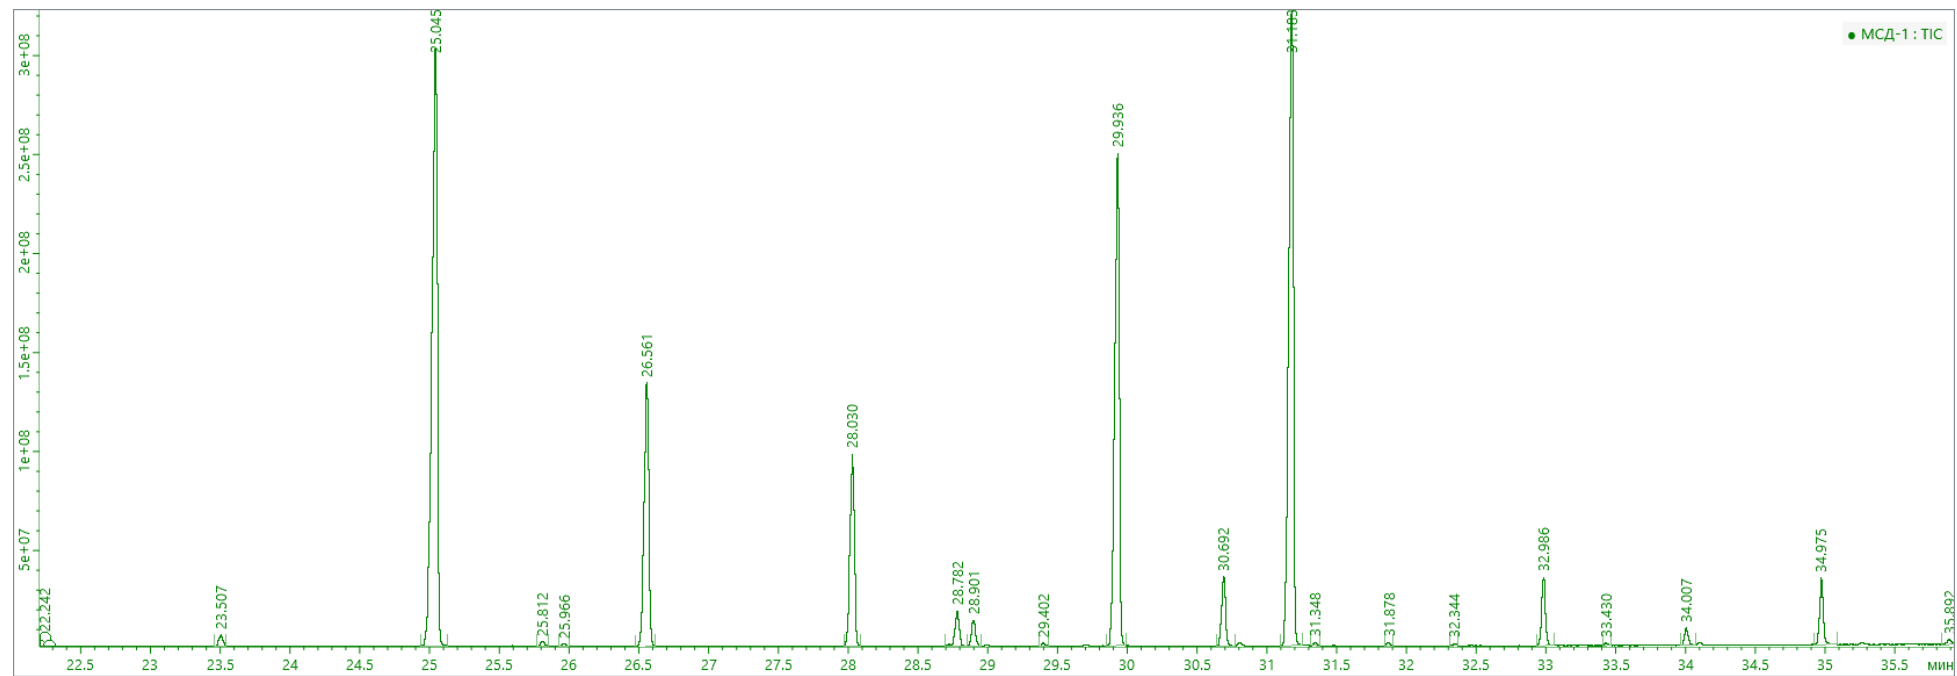



# Em-D, 7th day

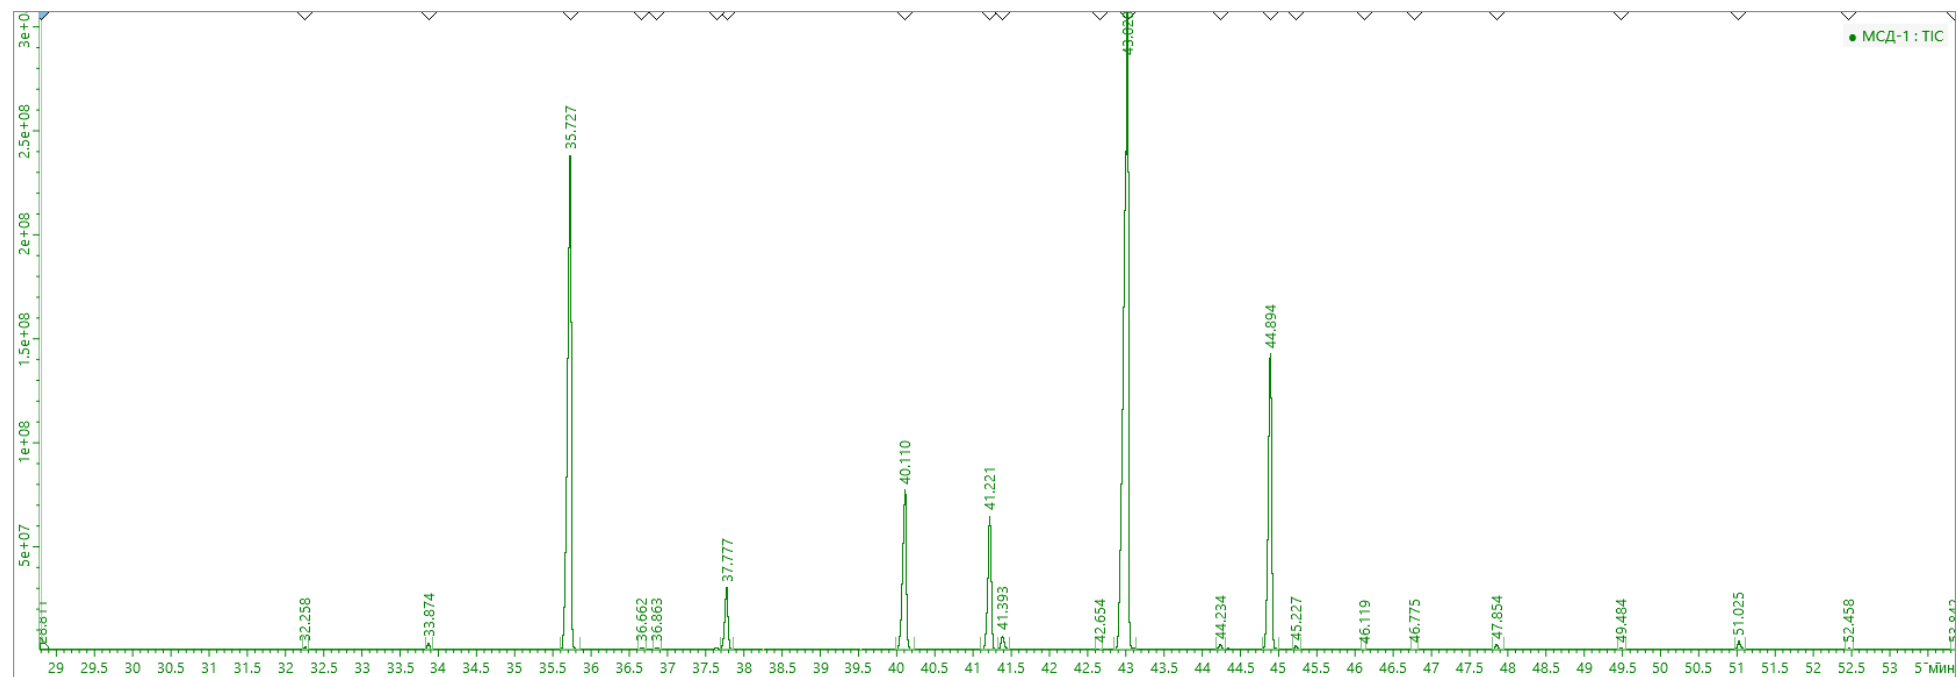

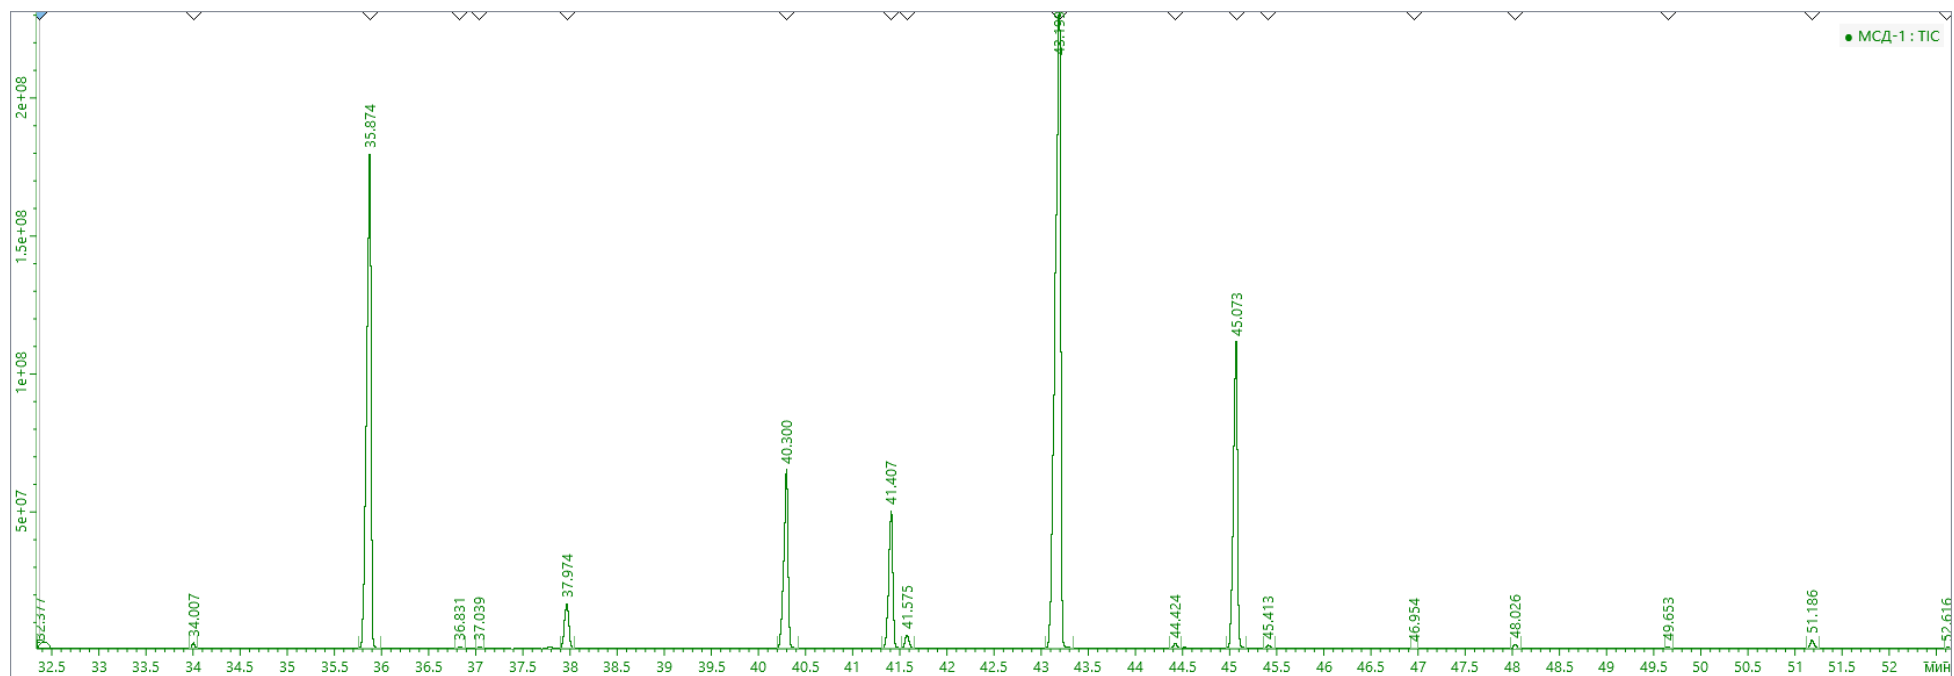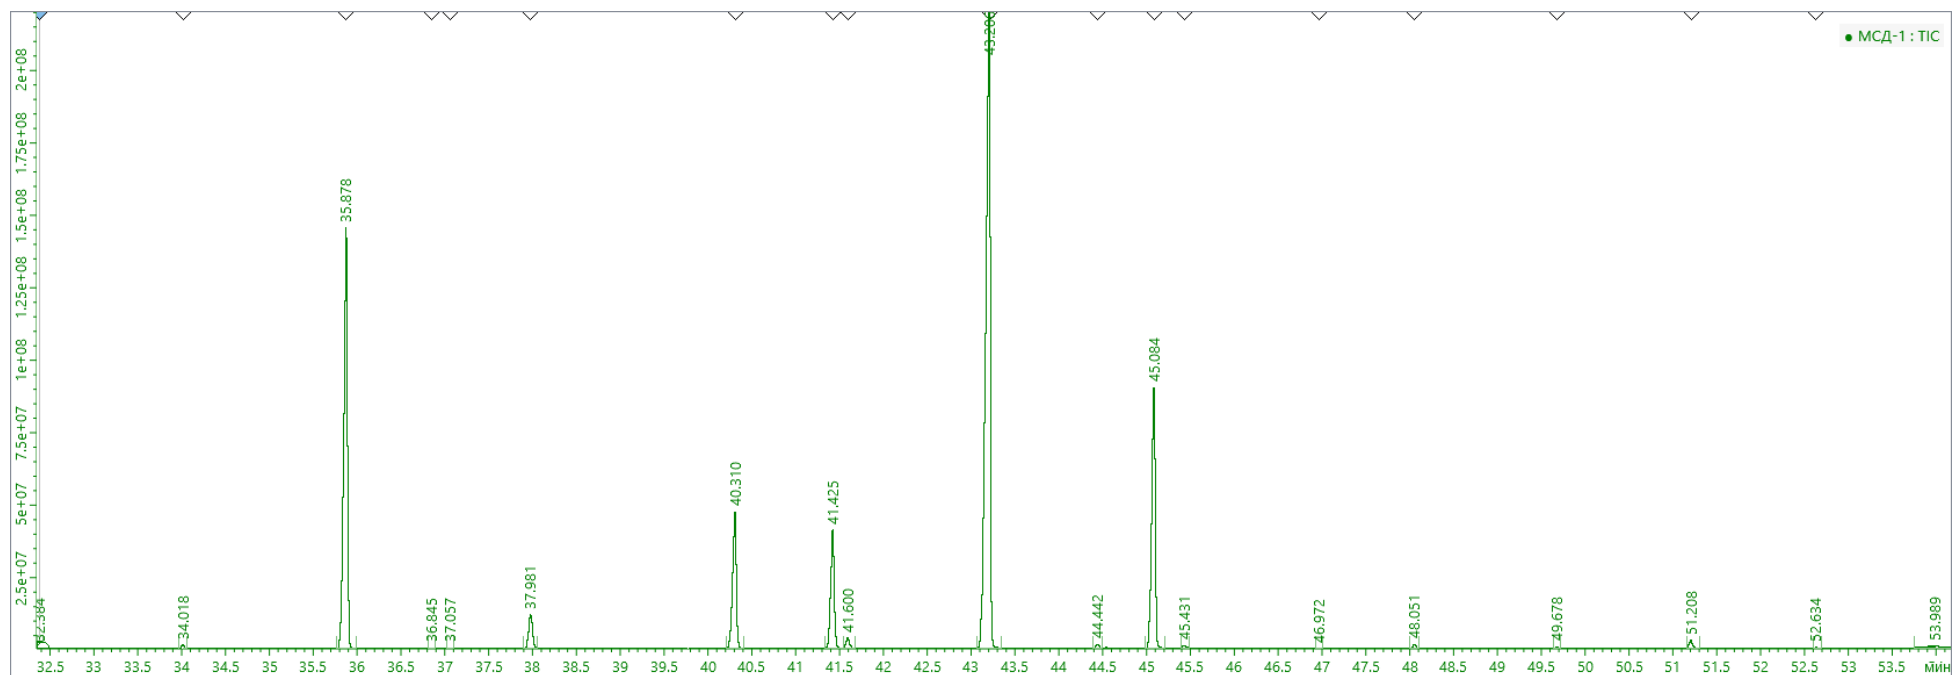

Em-D, 11th day

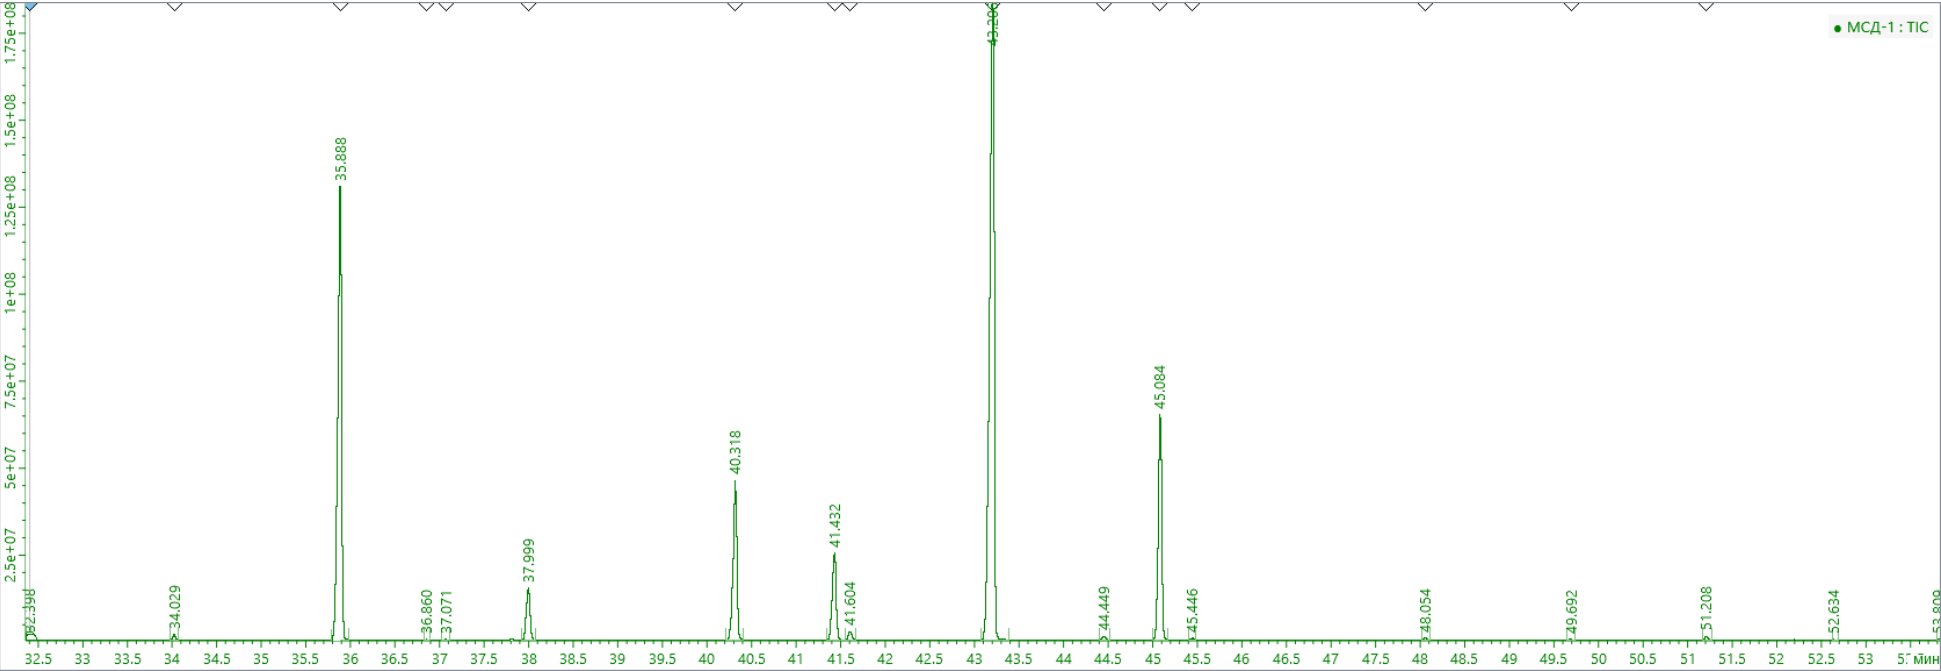

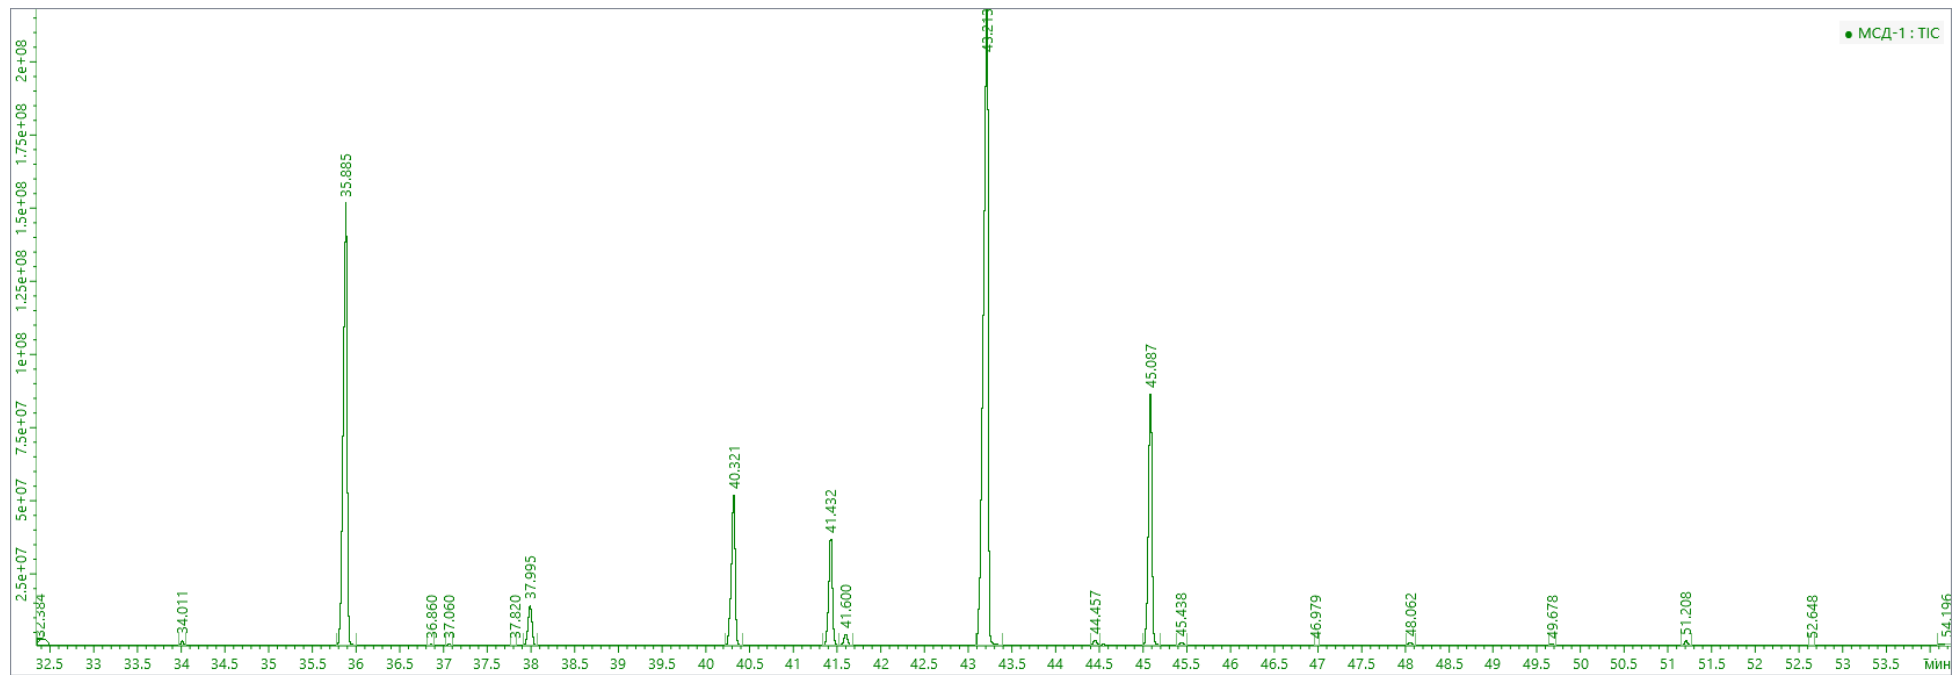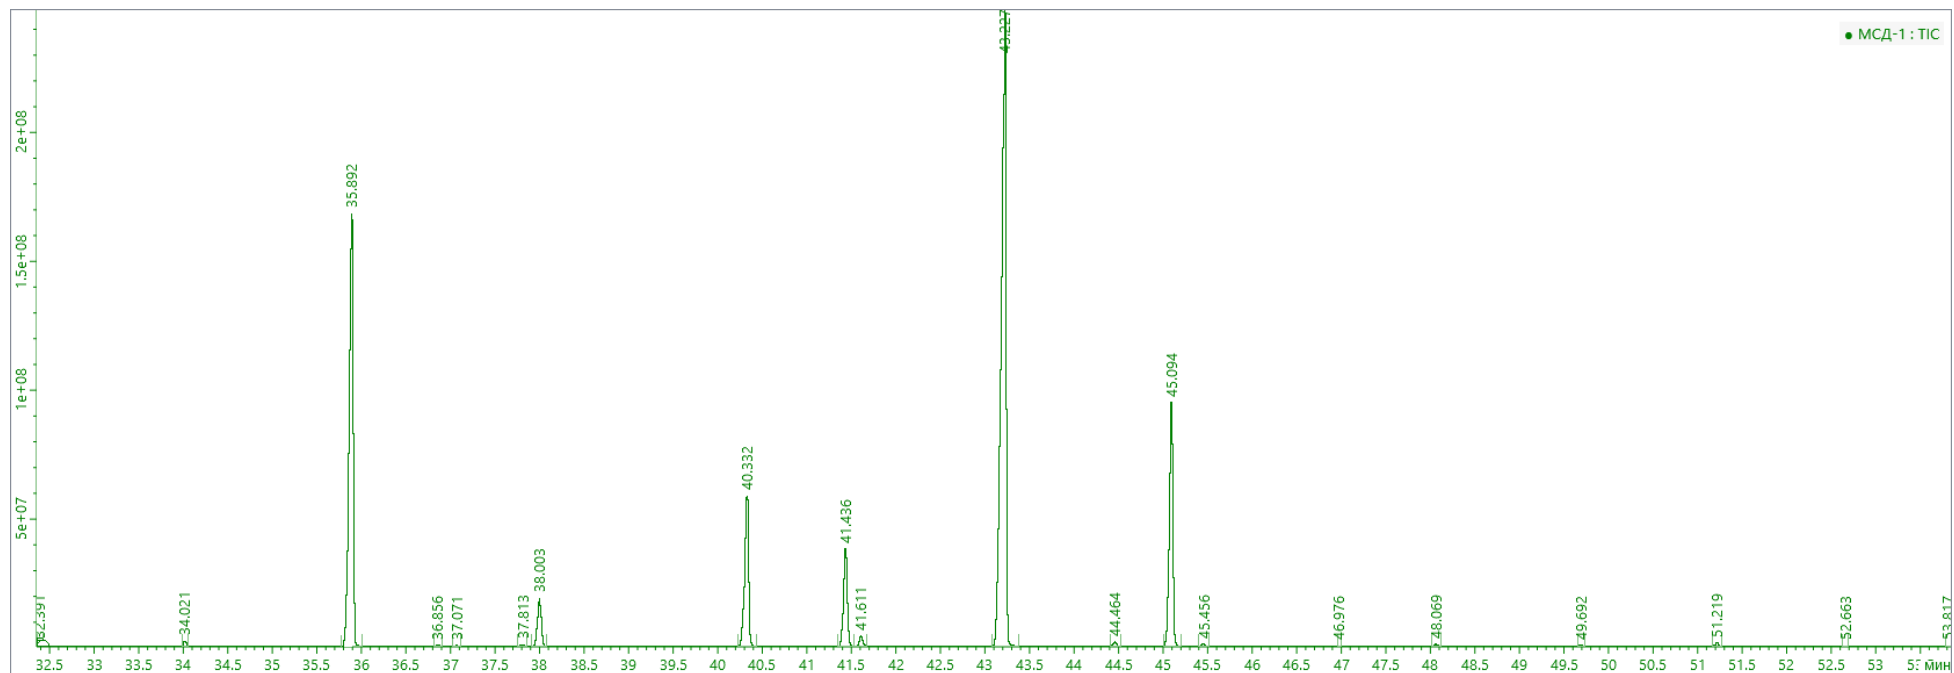

# Em-D, 14th day (control, 6 reps)

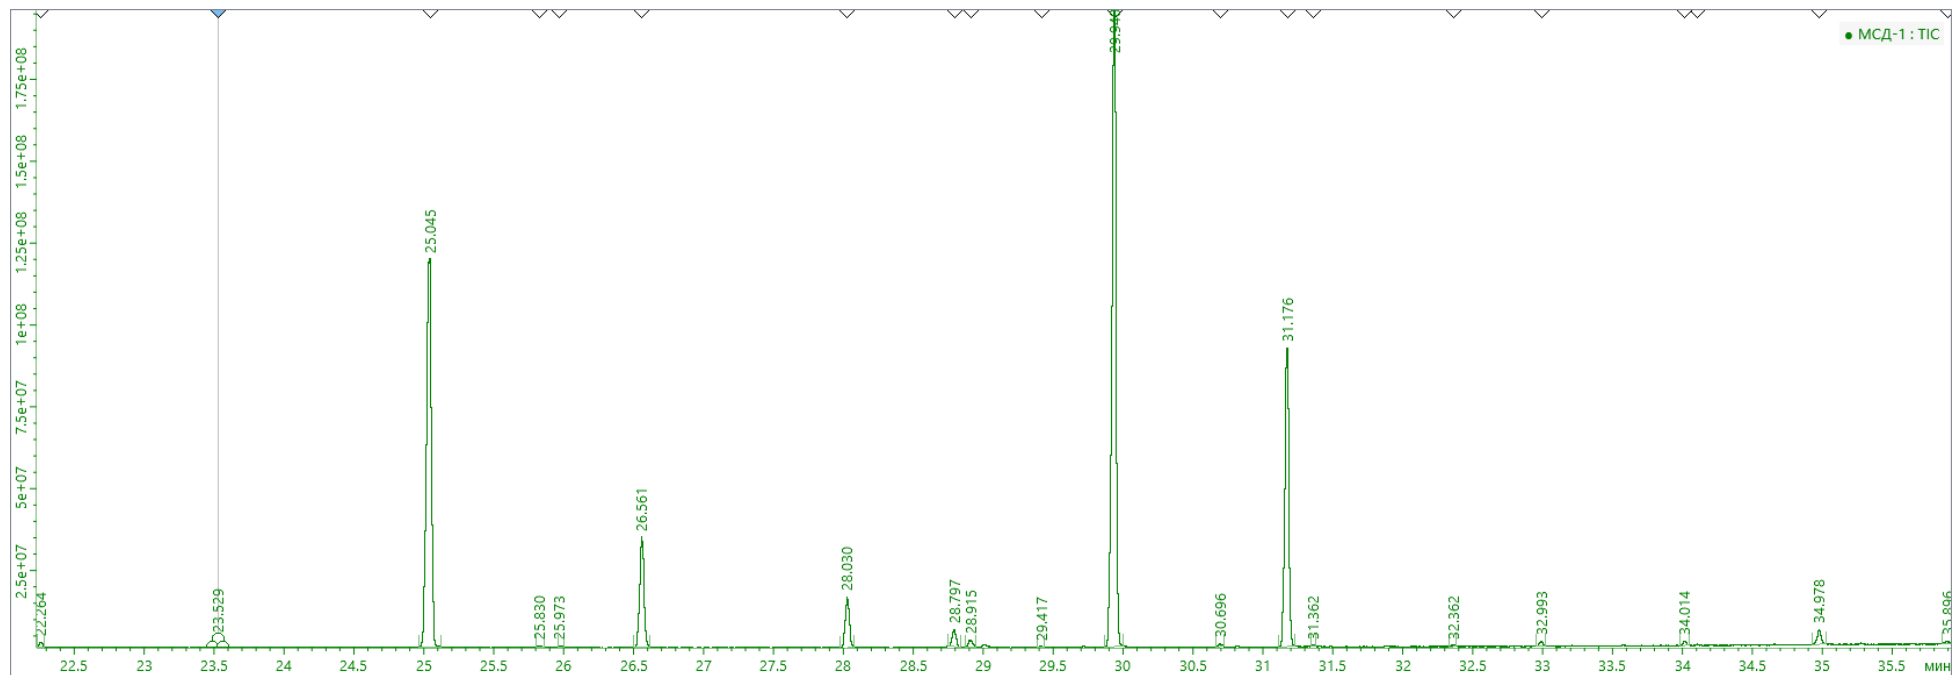

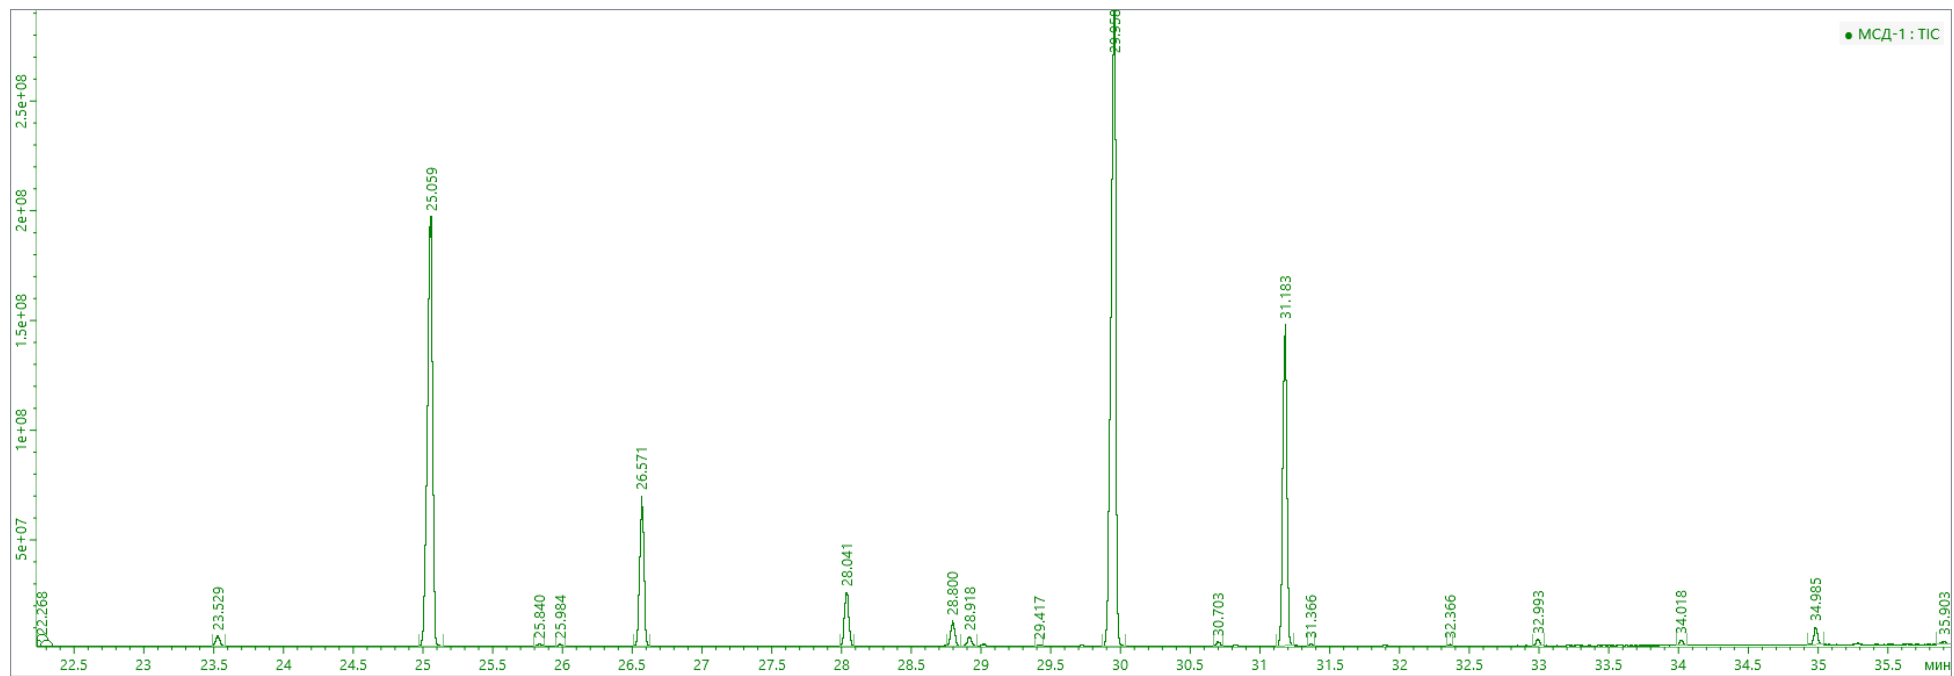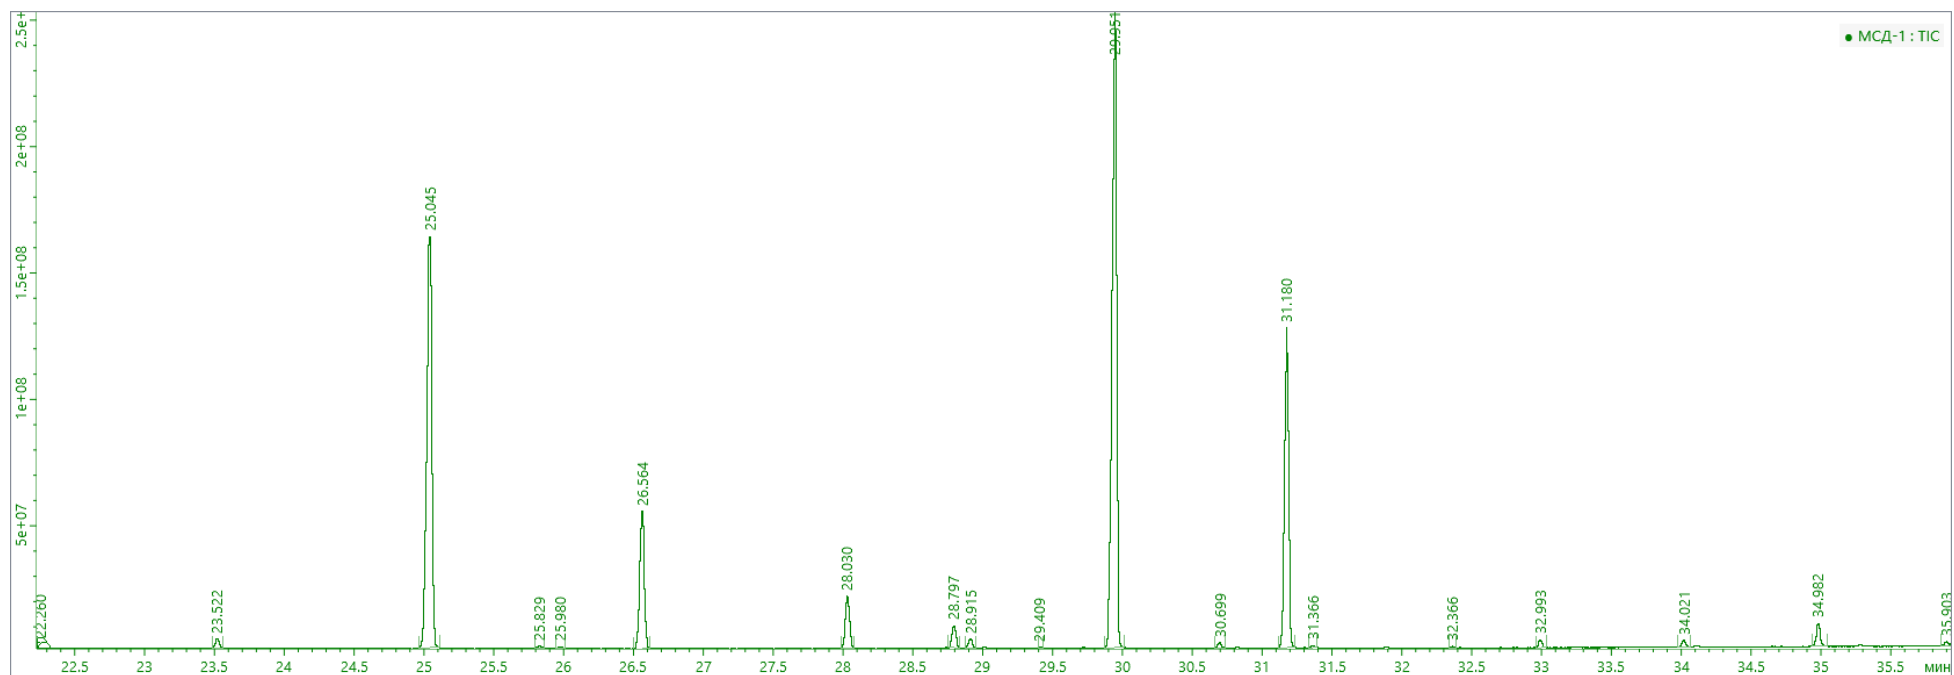

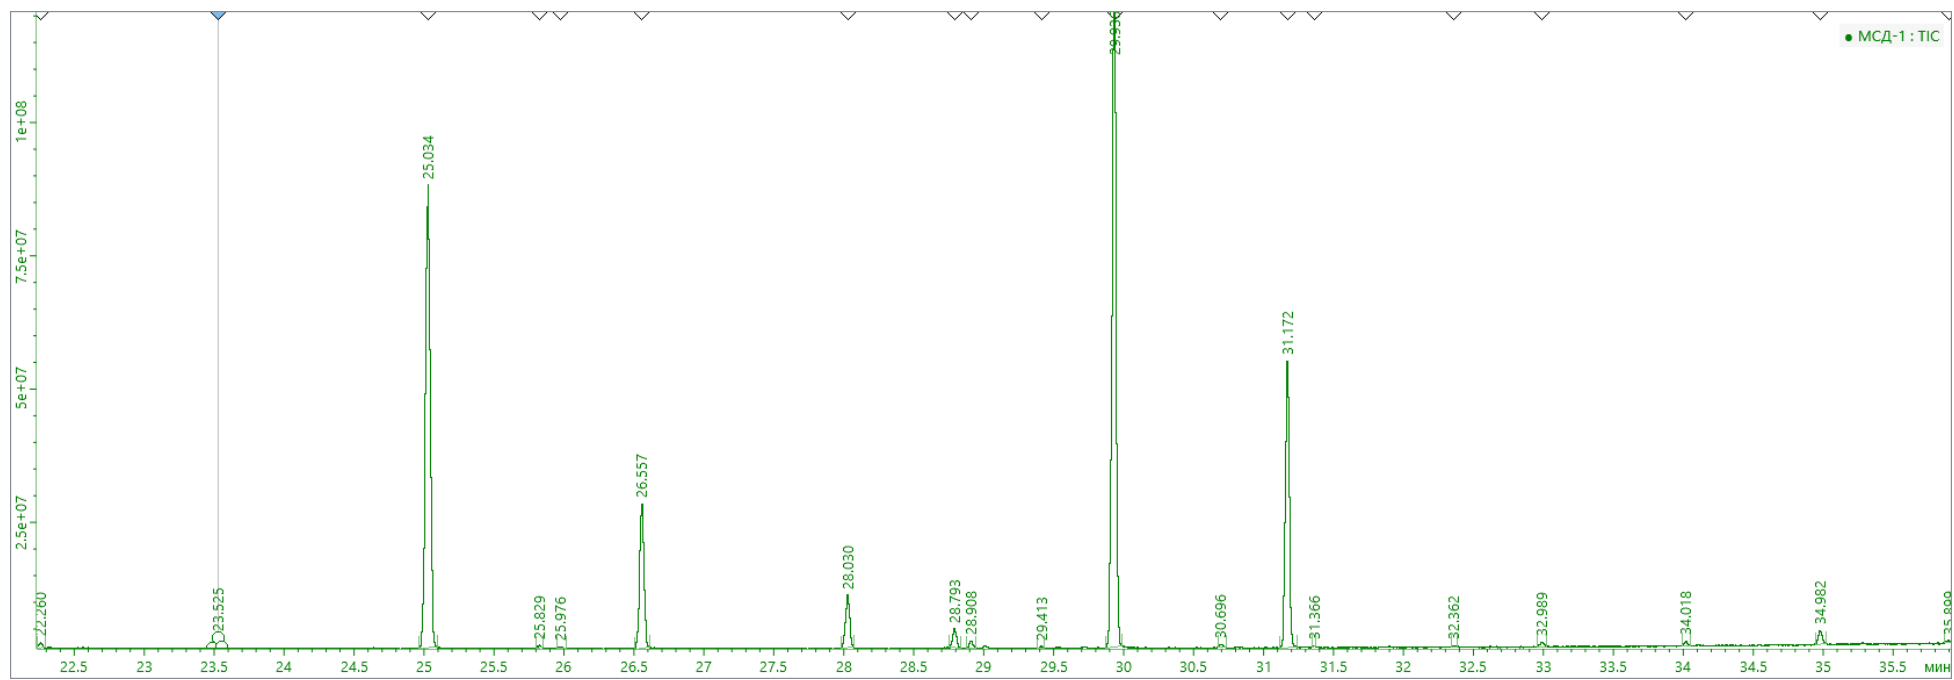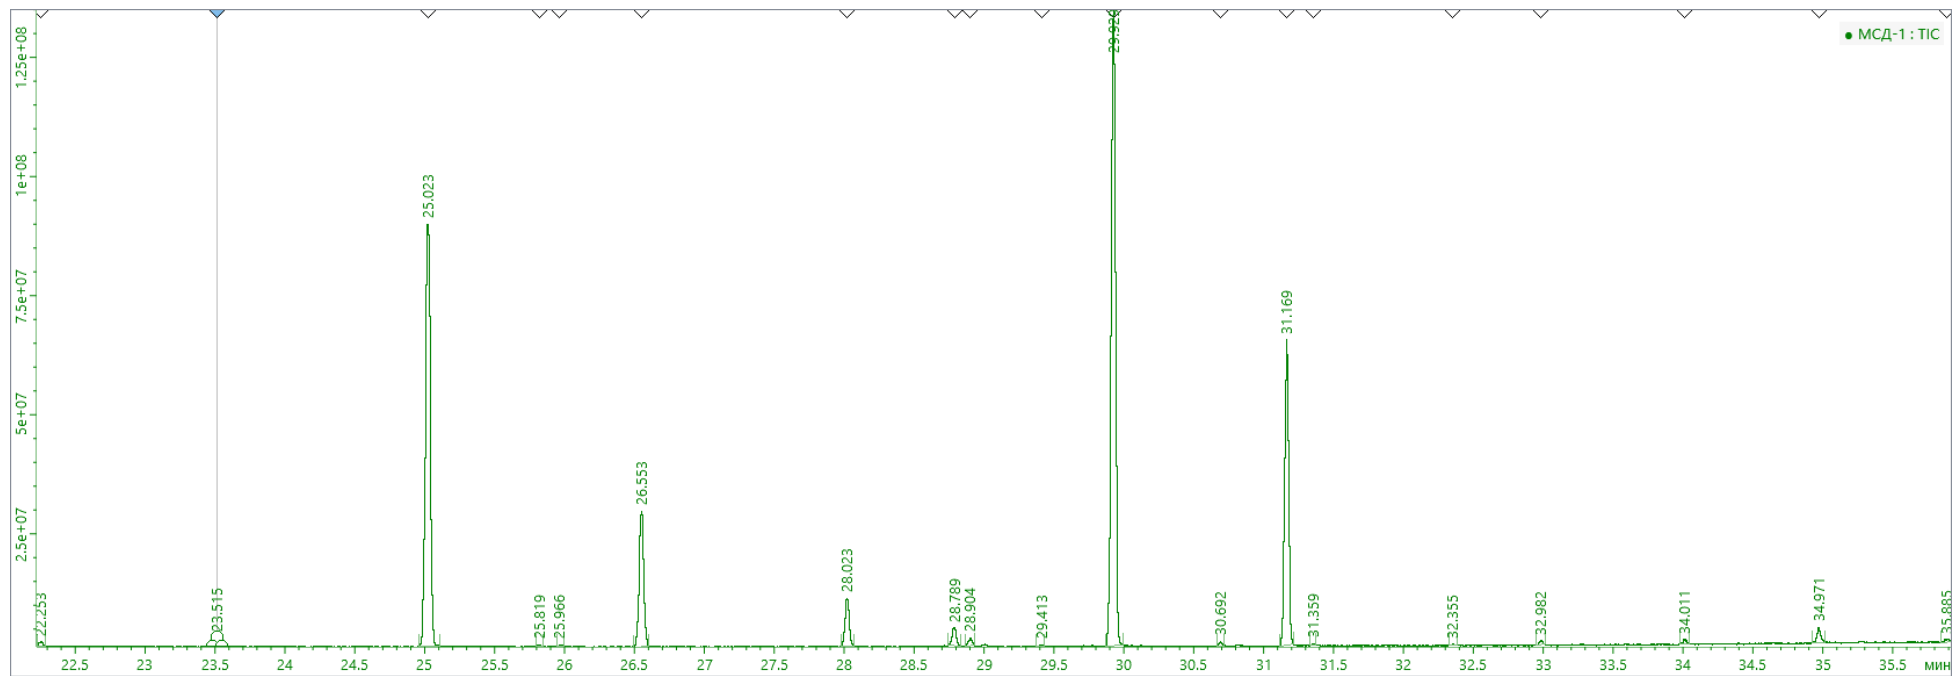

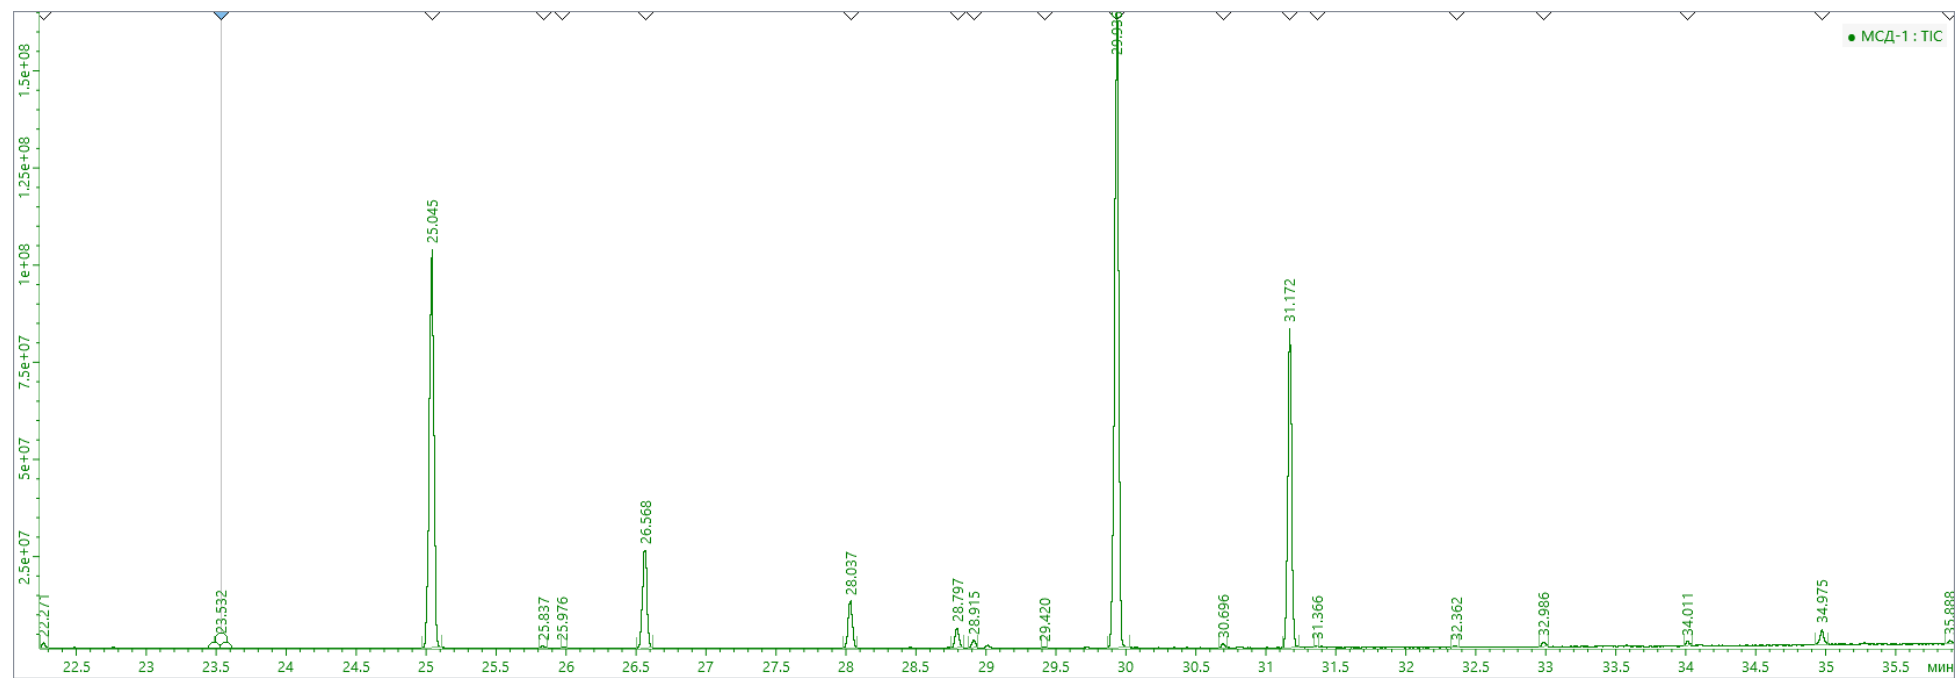



Em-D, 21st day

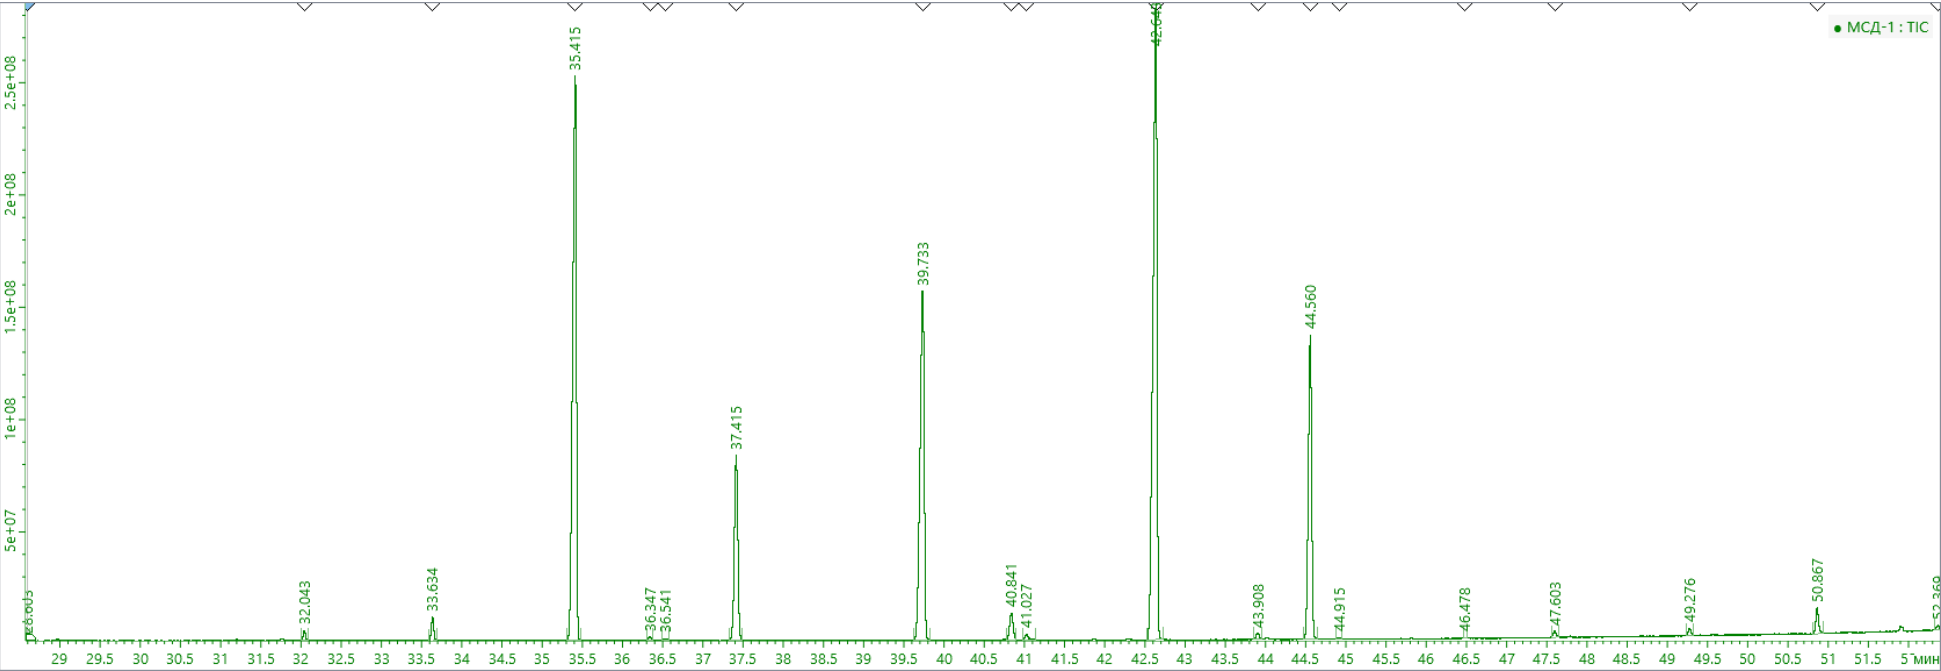

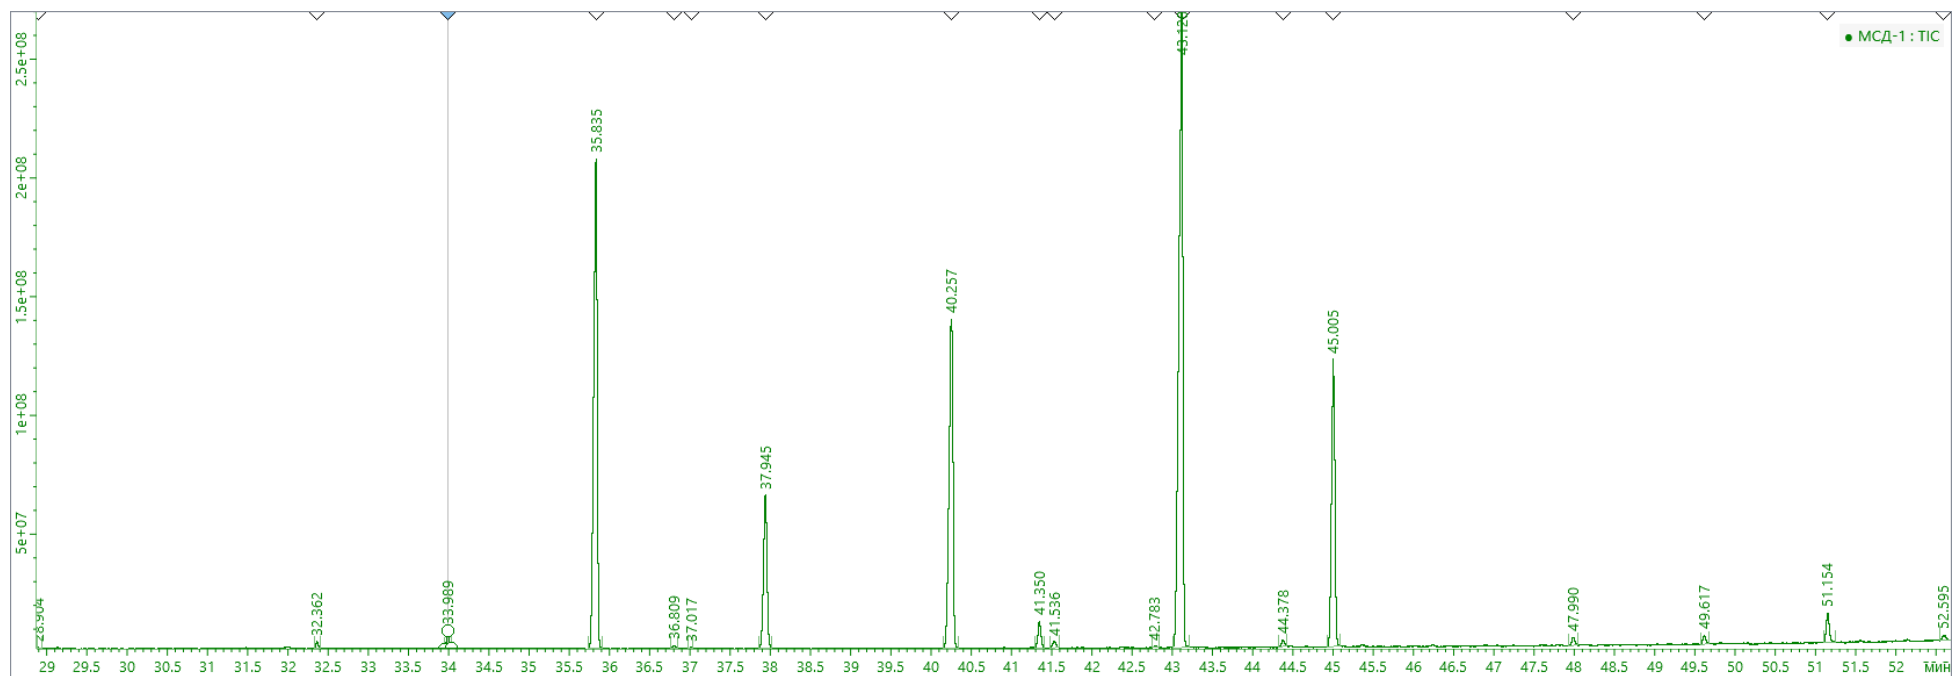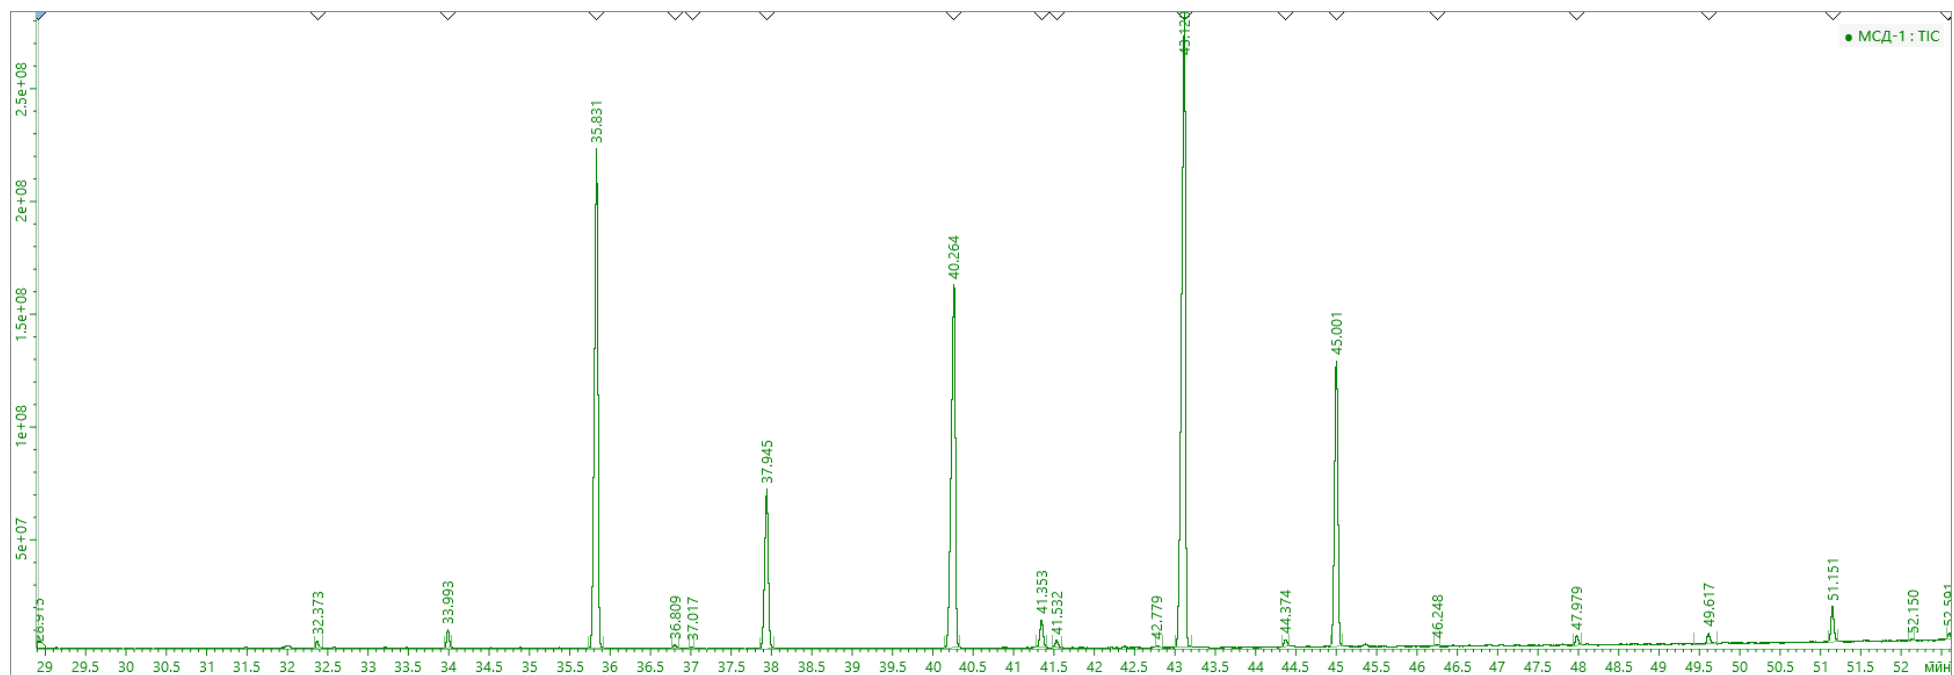

Em-D, 31st day

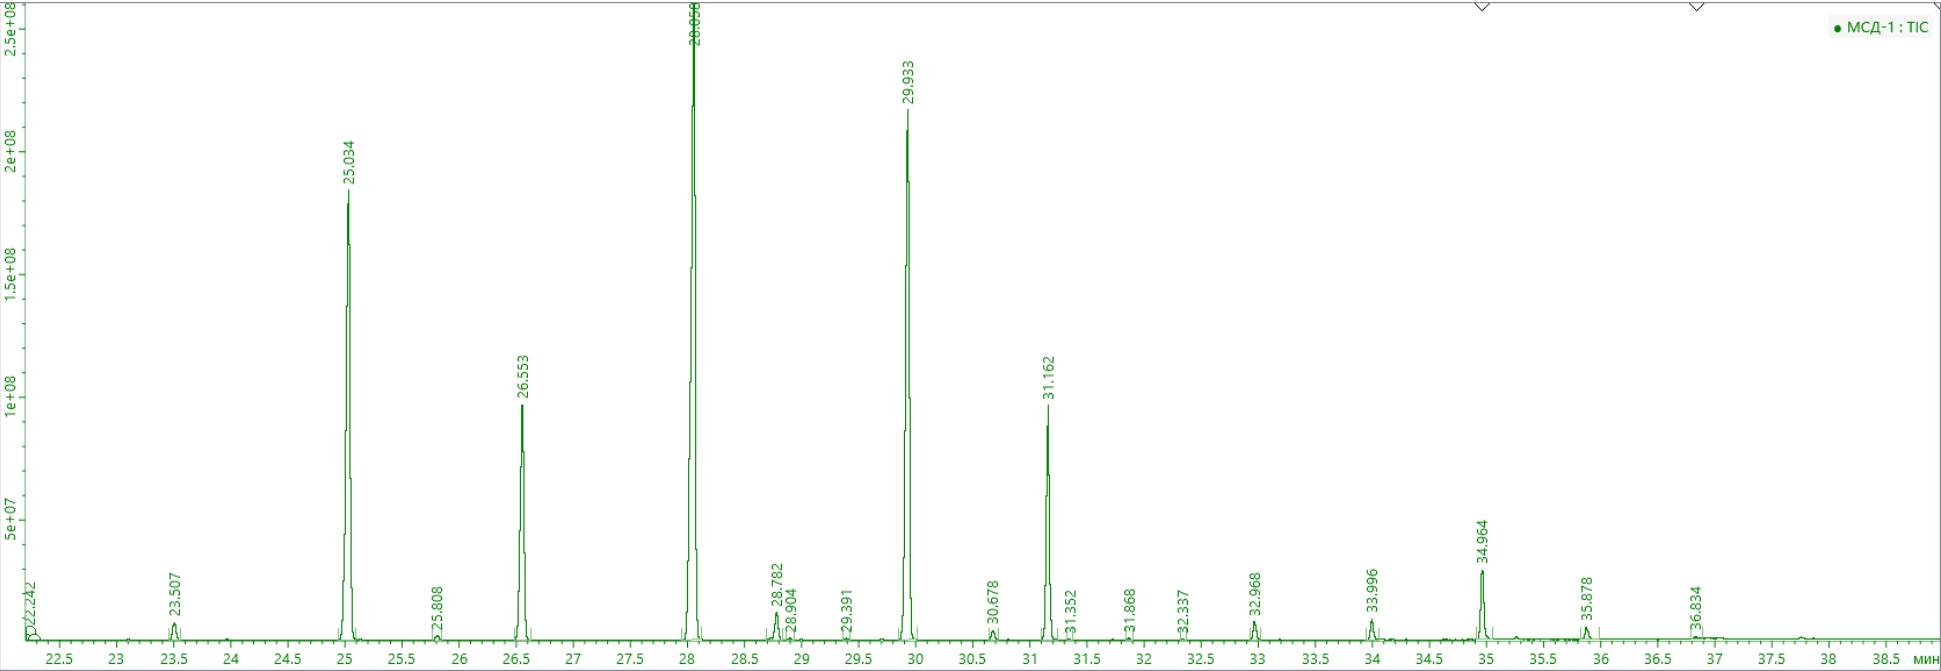

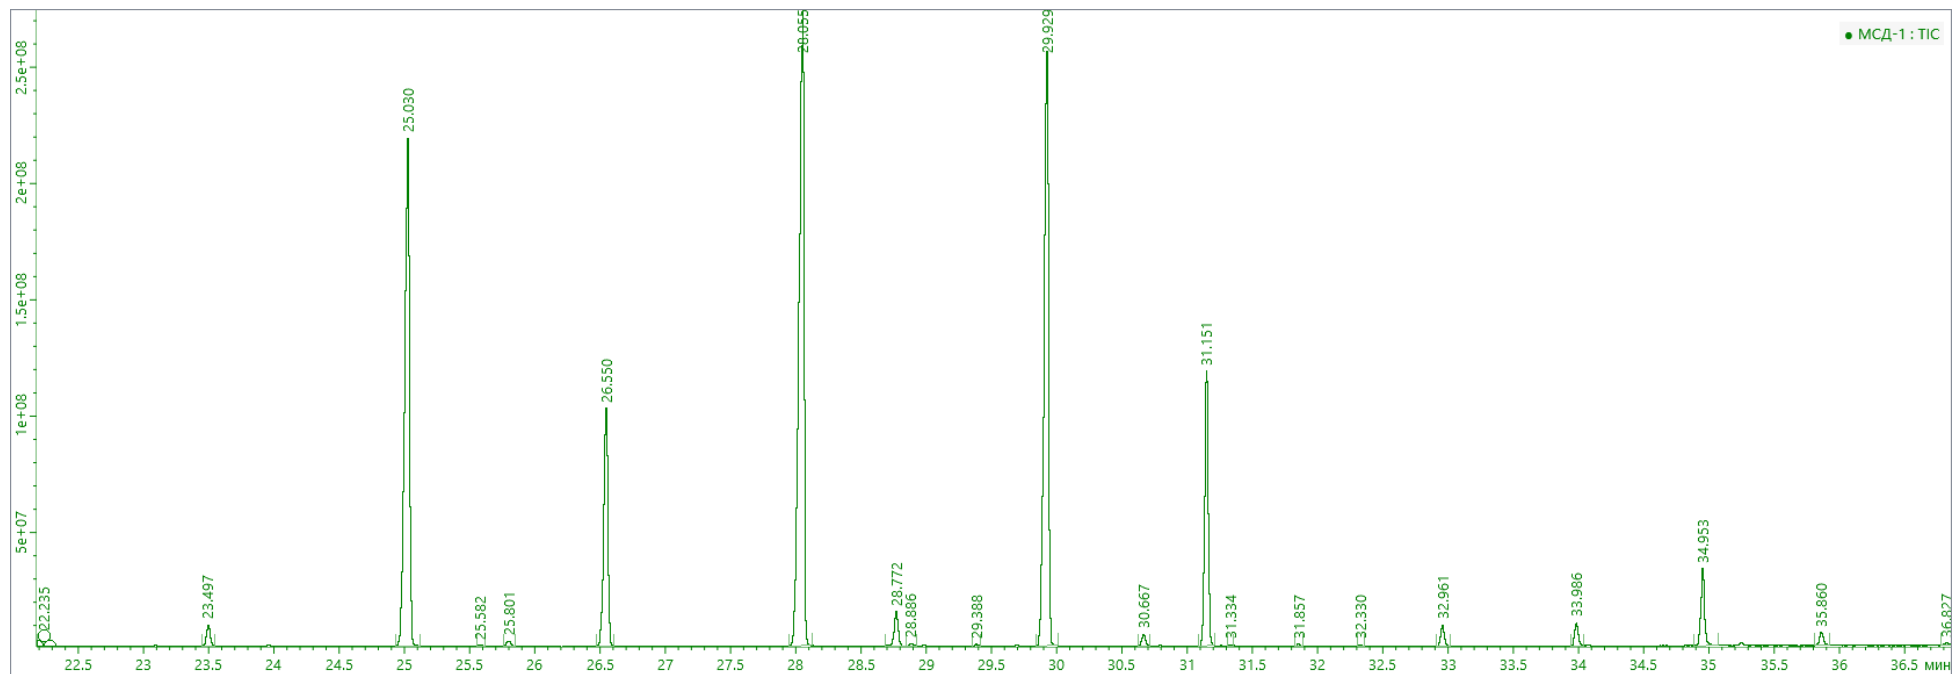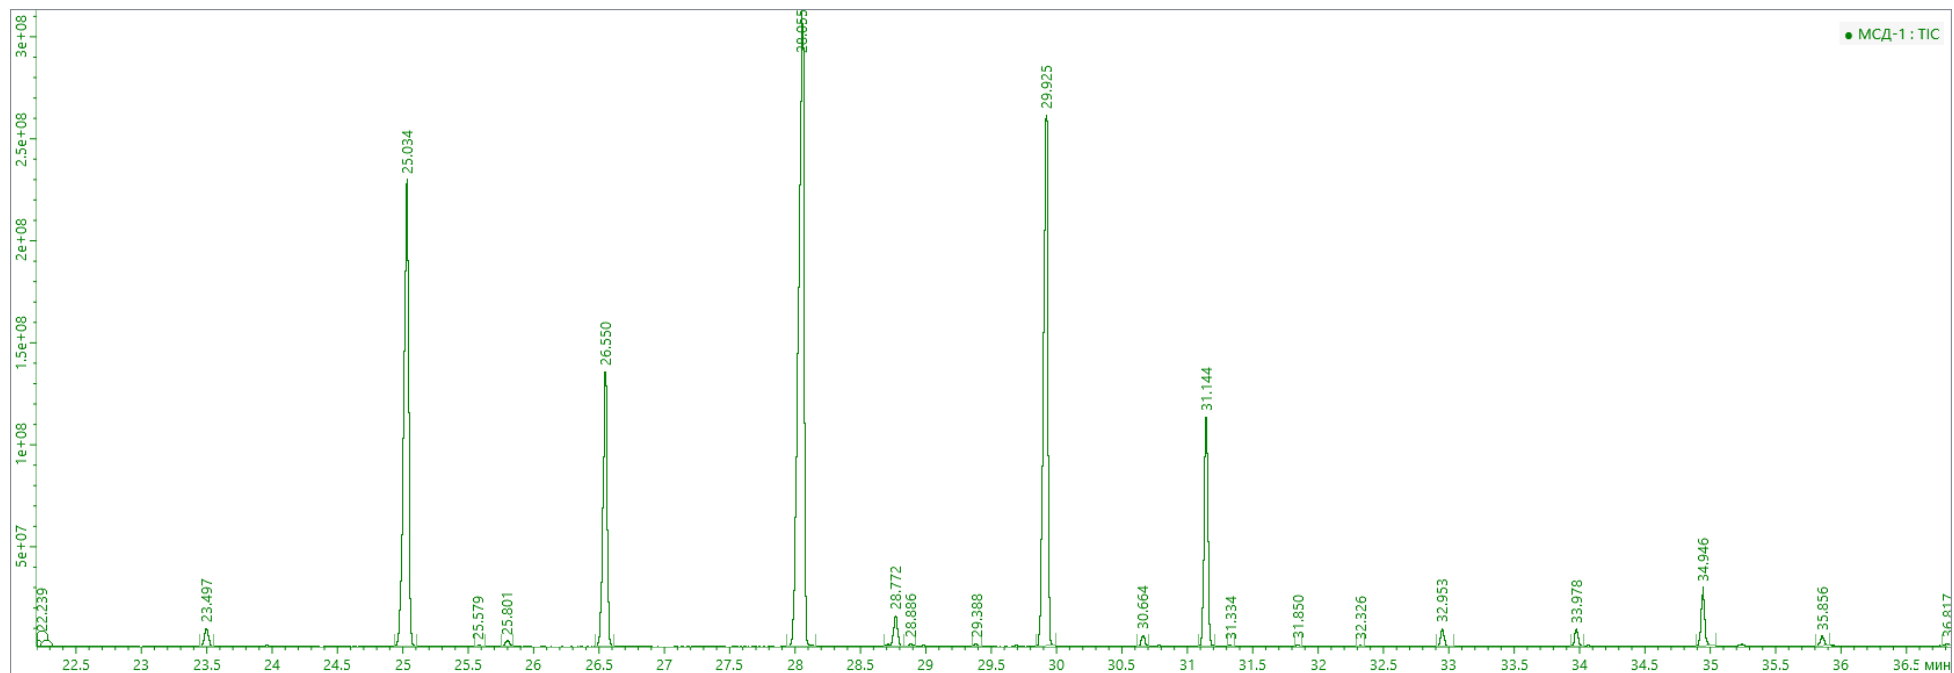

# Em-D + MeJa (6 reps)

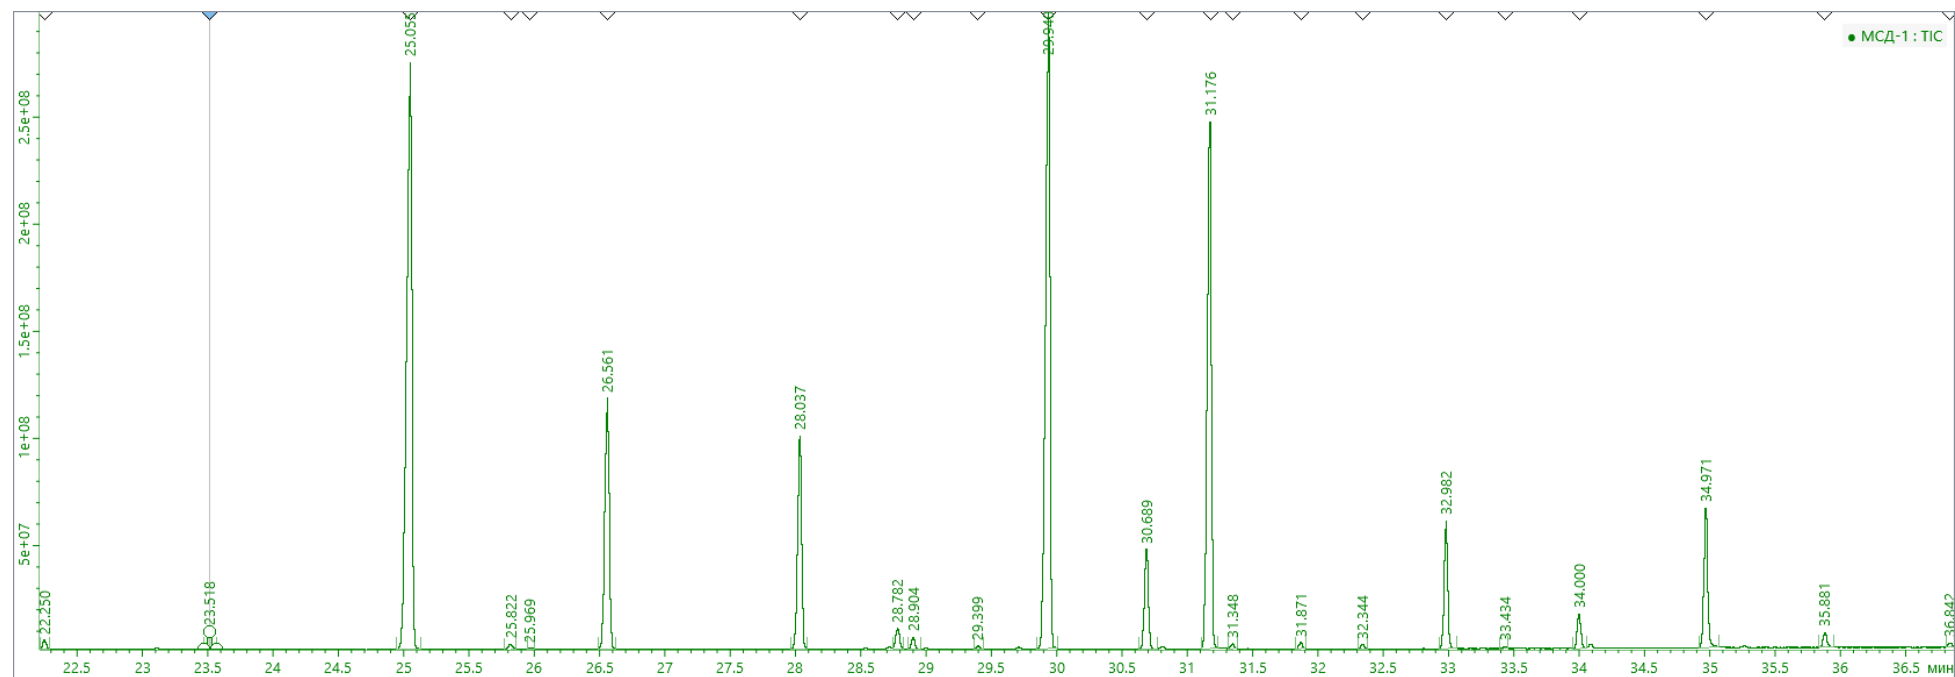

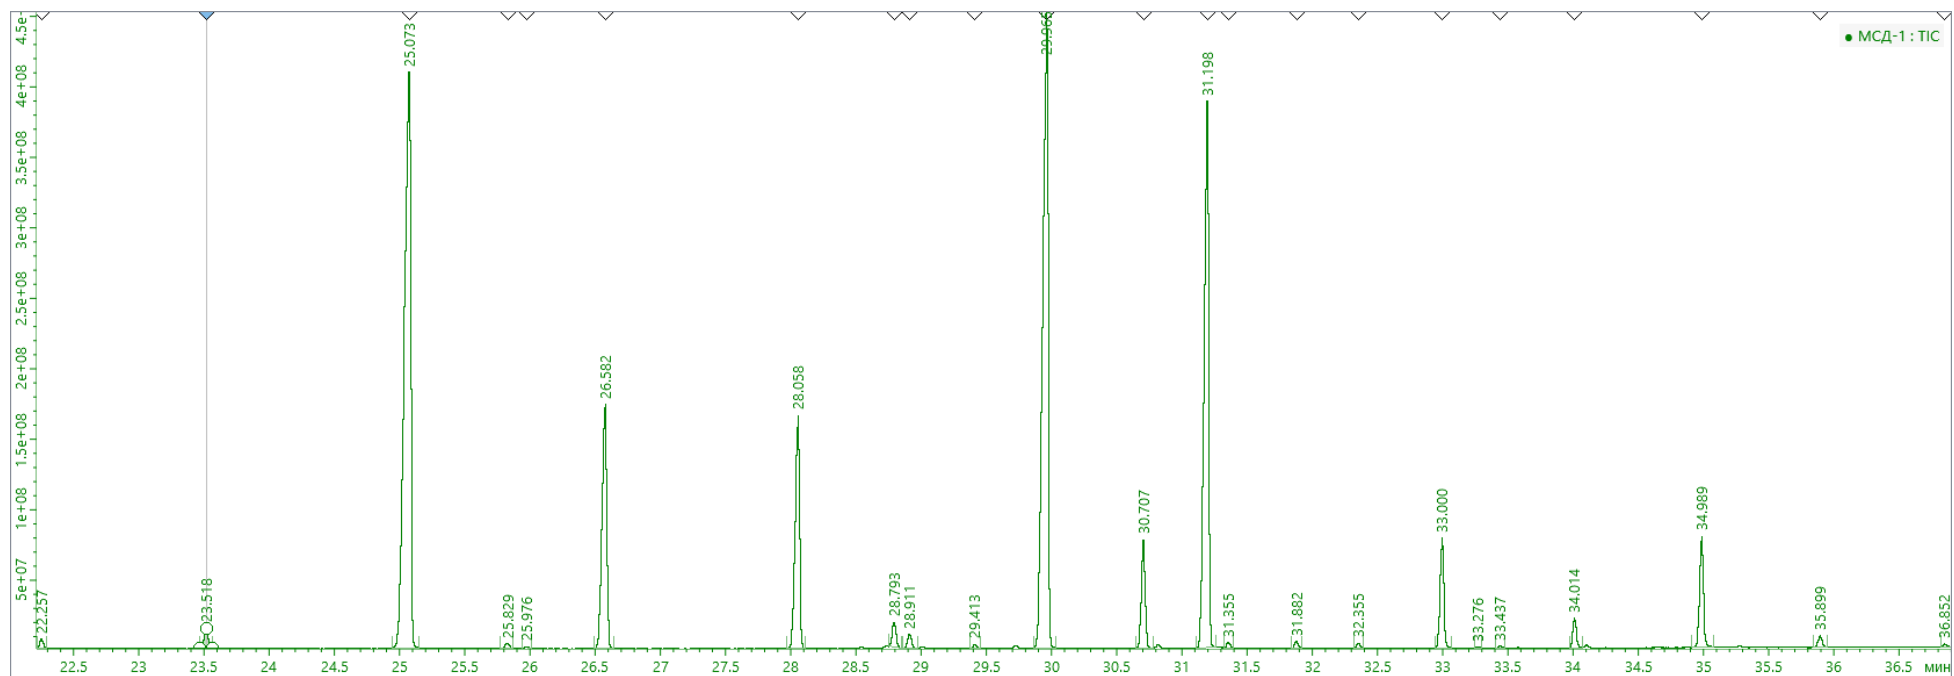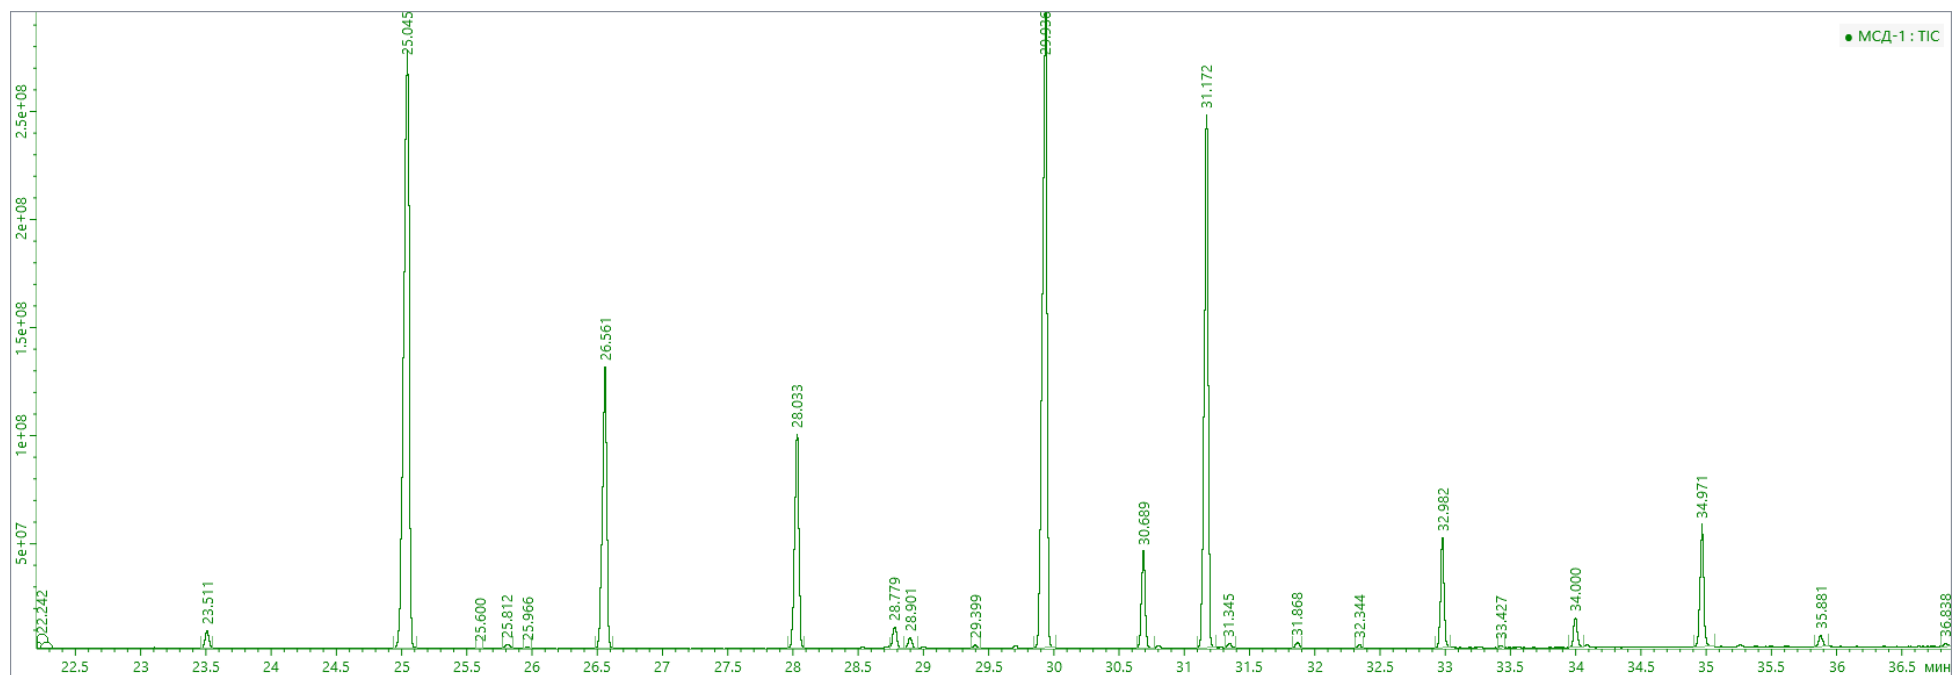

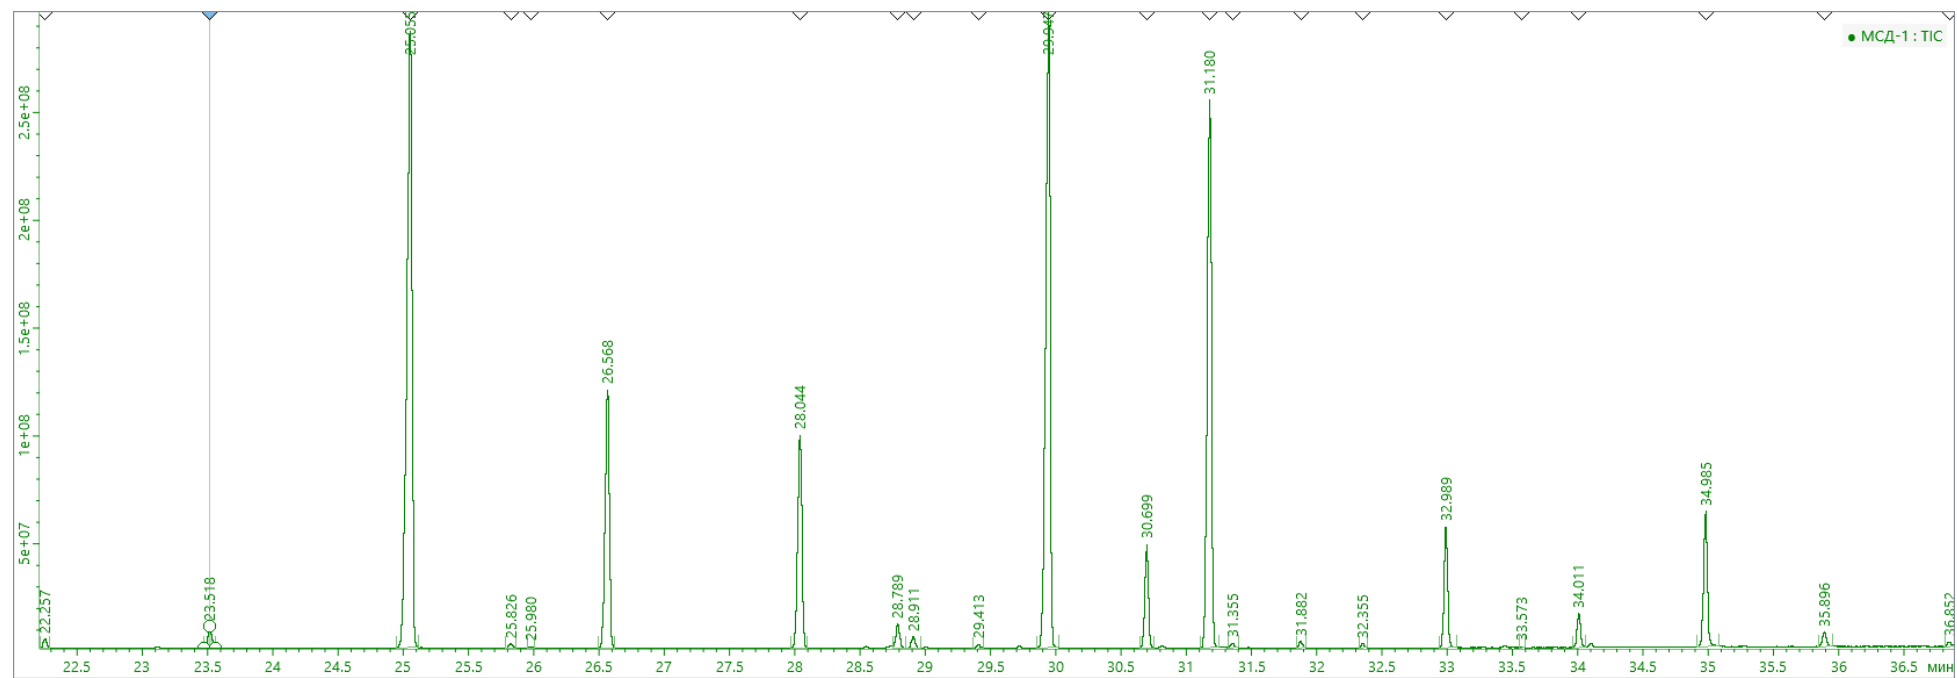

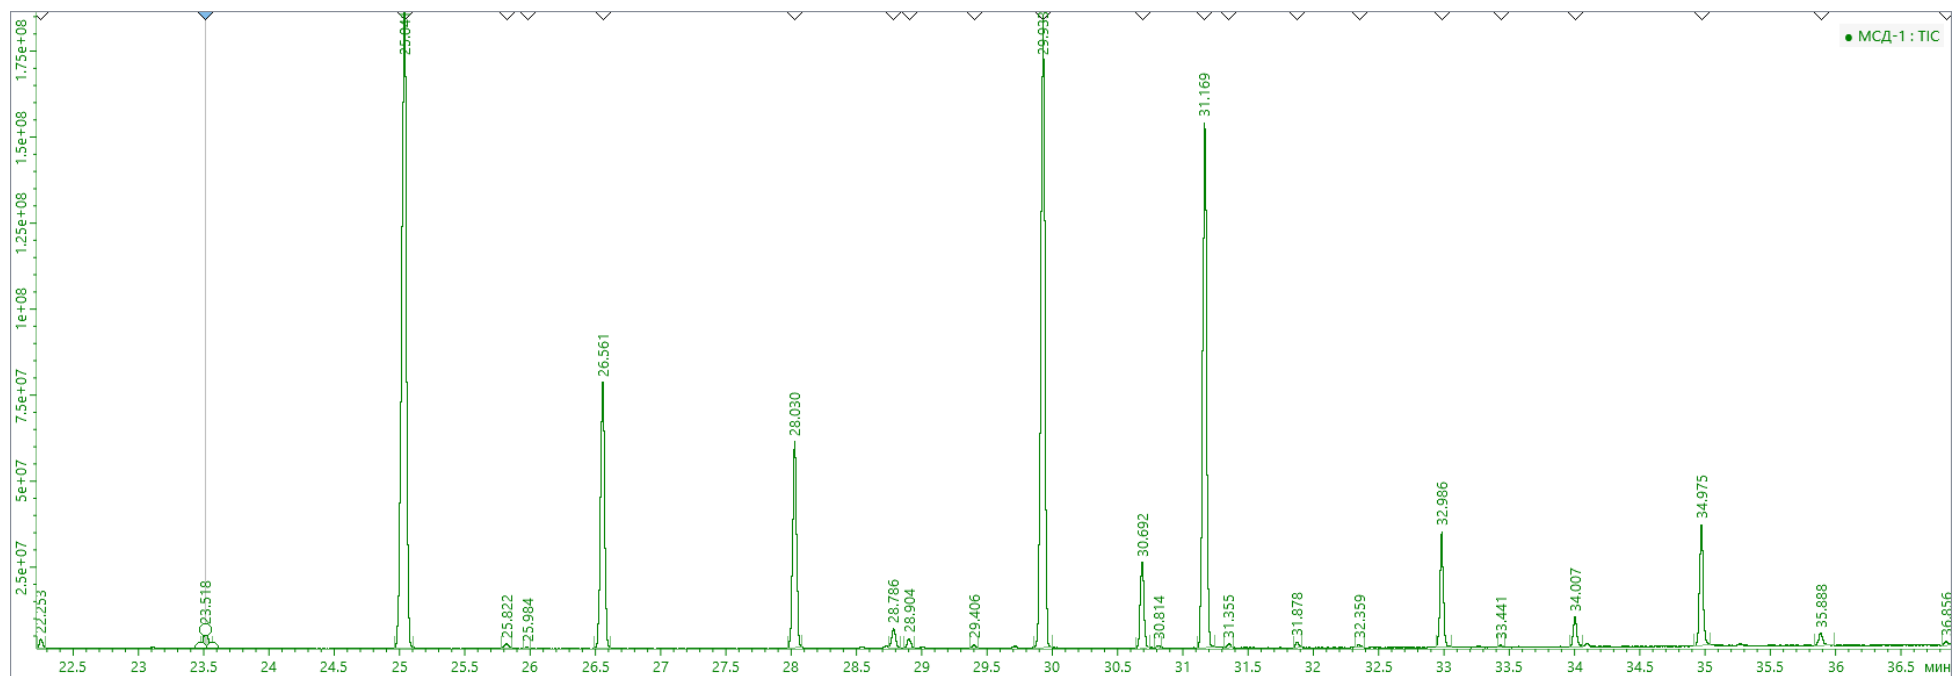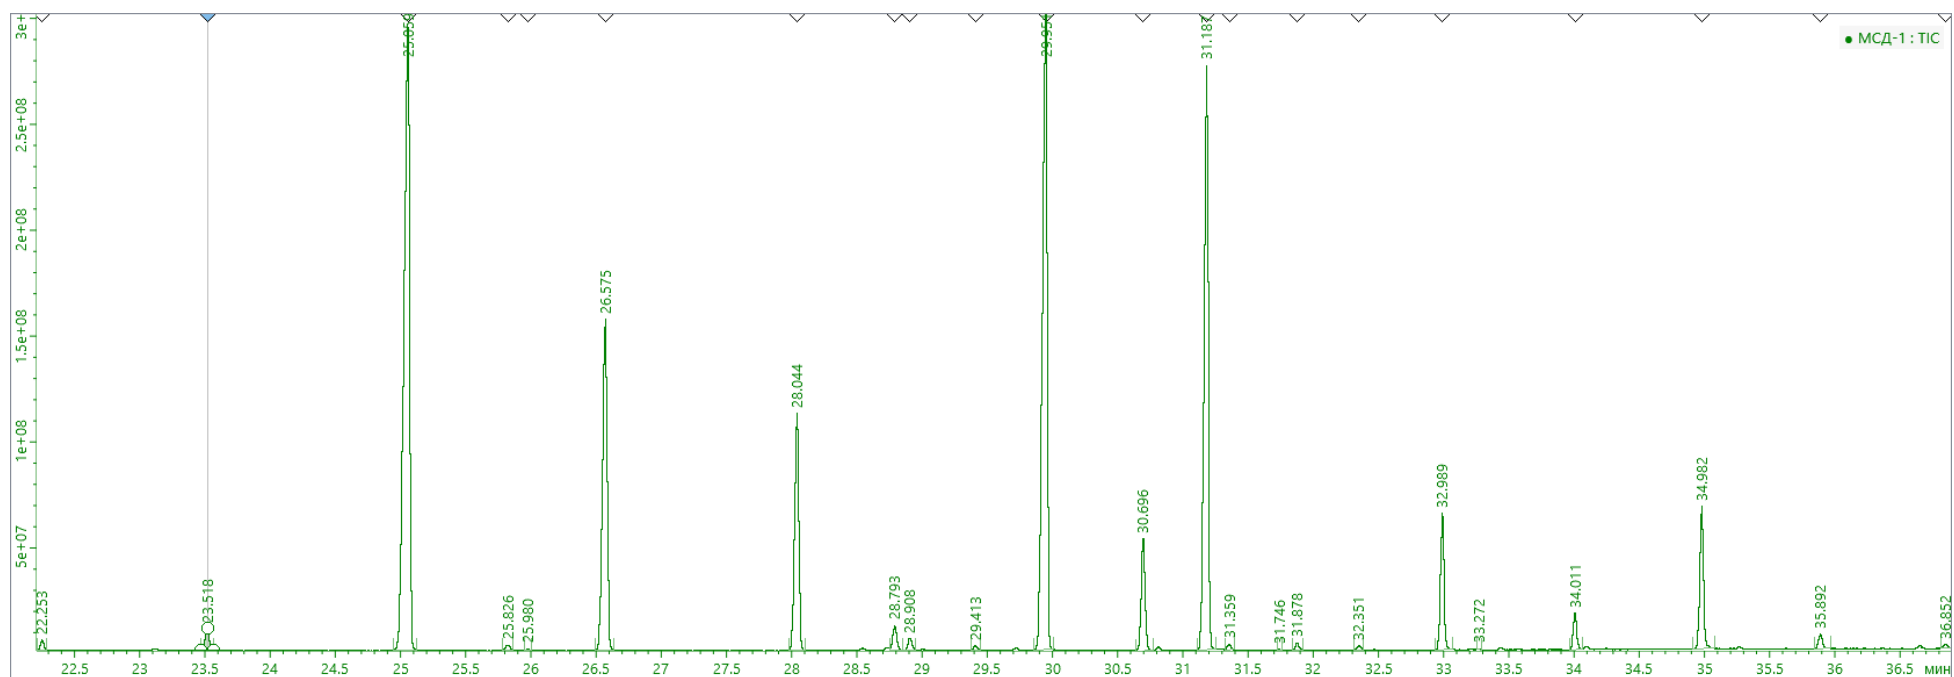

Supplement: Supplementary file 4 [file supplementary]
