# Supplementary material for: Light and Methyl Jasmonate Impact in the Biosynthesis of Anthocyanins and VLCFAs in the <em>Euonymus maximowiczianus</em> Aril-Derived Long-Term Suspension-Cultured Cells
Source: Preprints.org preprint supplement (doi:10.20944/preprints202309.0039.v2), 2023-12-11
Supplement: Supplementary file 1 [file supplementary]

# Light and Methyl Jasmonate Impact in the Biosynthesis of Anthocyanins and VLCFAs in the *Euonymus maximowiczianus* Aril-Derived Long-Term Suspension-Cultured Cells

## Supplementary Materials:

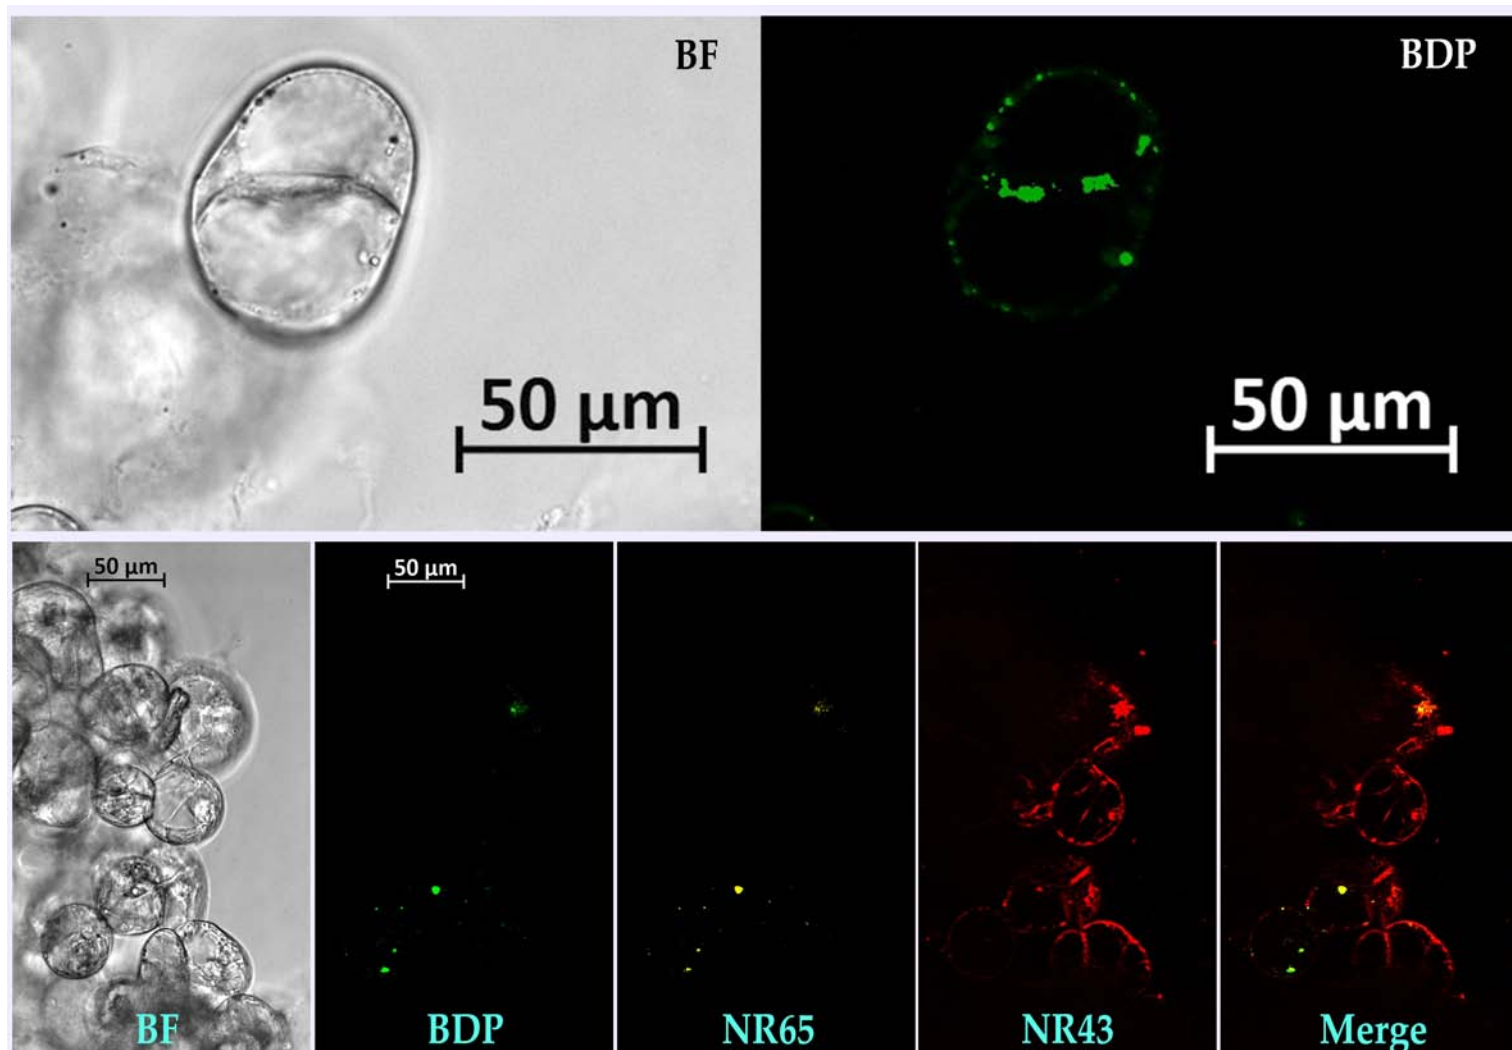

Figure S2. Visualization of lipid droplets in the suspension-cultured cells of *Euonymus maximowiczianus*. **BF** – bright-field image; **BDP** – BODIPY 505/515 staining of lipid droplets (epifluorescence image with excitation 470/40 nm and emission 525/50 nm); **NR65** – Nile red staining of lipid droplets (epifluorescence image with filter set 65 HE, excitation 475/30 nm, emission 550/100 nm); **NR43** – Nile red staining of polar lipids (epifluorescence image with filter set 43 HE, excitation 550/25 nm, emission 605/70 nm); **Merge** – combination of three fluorescent channels. For details of staining, see the main text.
