# Supplementary material for: Light and Methyl Jasmonate Impact in the Biosynthesis of Anthocyanins and VLCFAs in the <em>Euonymus maximowiczianus</em> Aril-Derived Long-Term Suspension-Cultured Cells
Source: Preprints.org preprint supplement (doi:10.20944/preprints202309.0039.v2), 2023-12-11
Supplement: Supplementary file 2 [file supplementary]

# Light and Methyl Jasmonate Impact in the Biosynthesis of Anthocyanins and VLCFAs in the *Euonymus maximowiczianus* Aril-Derived Long-Term Suspension-Cultured Cells

## Supplementary Materials:

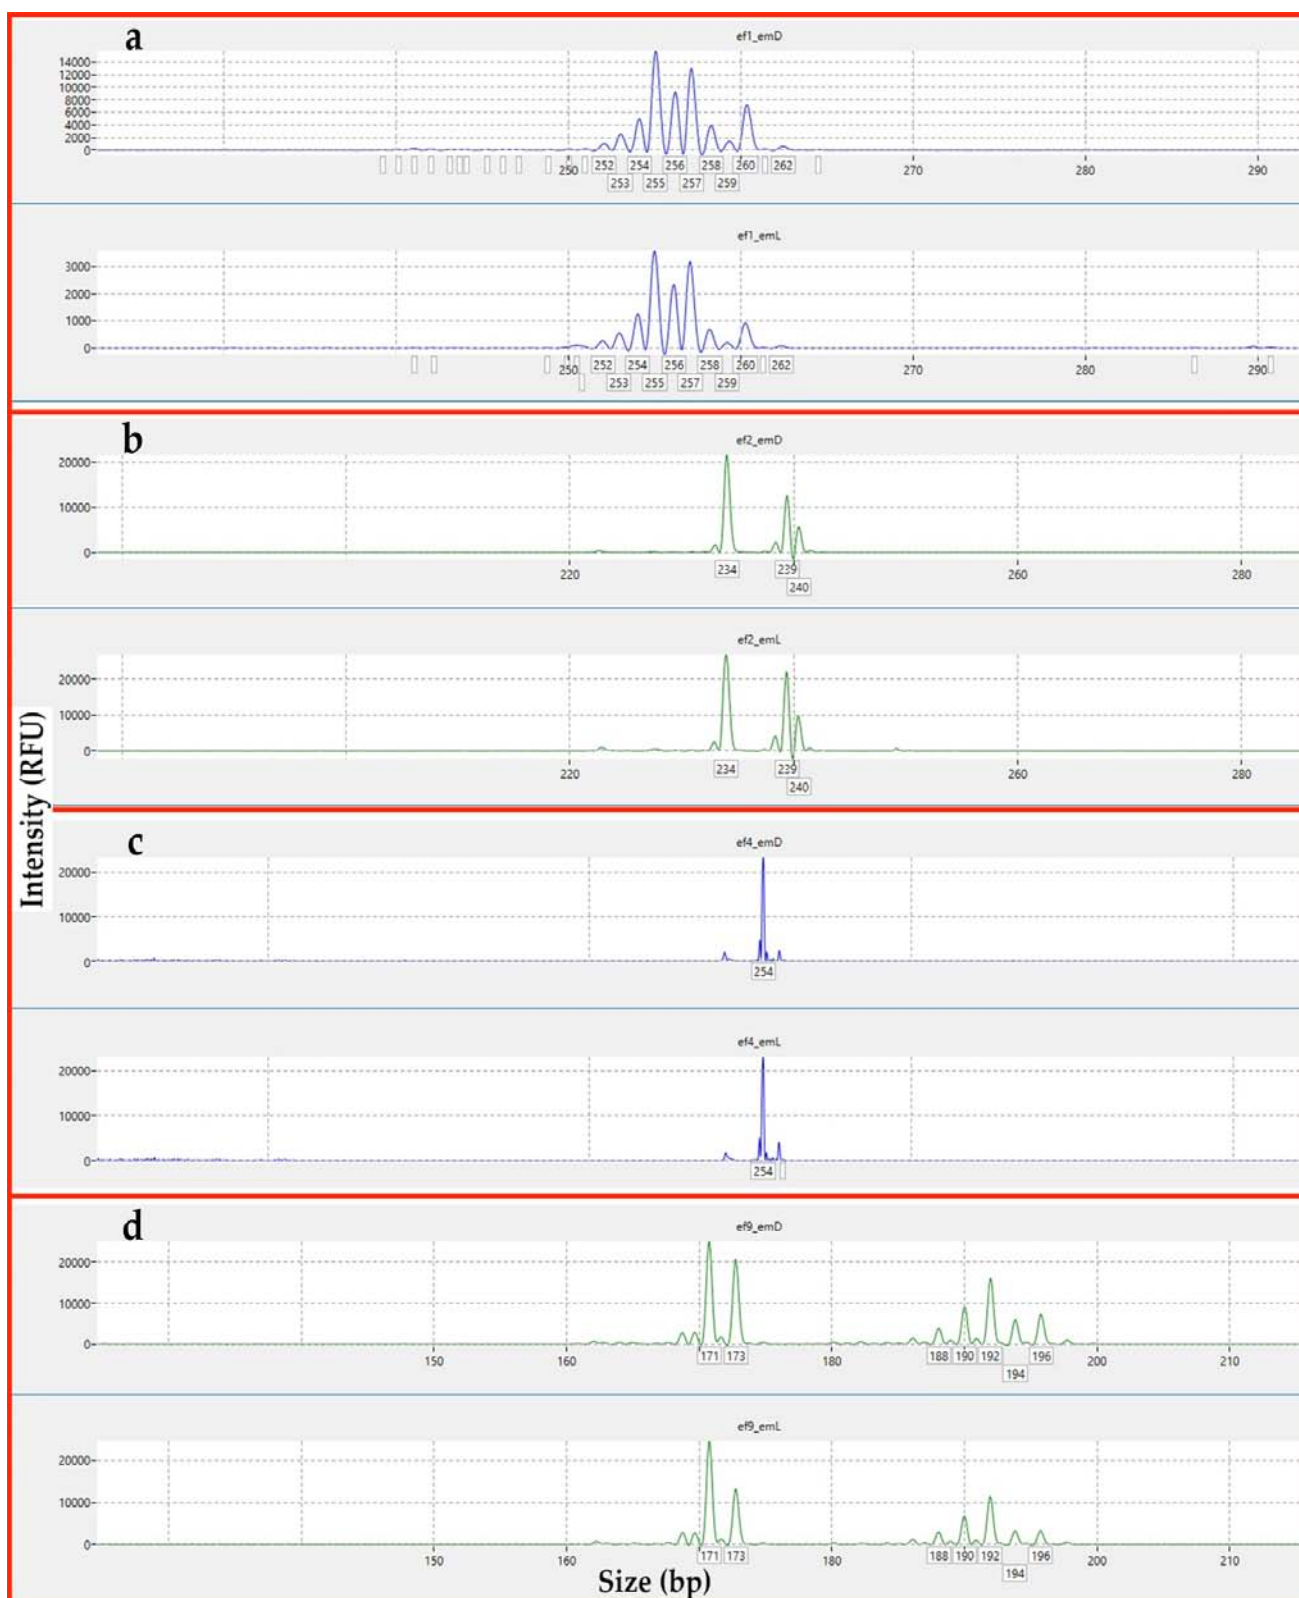

Figure S1. DNA fragment analysis of the Em-D and Em-L cell cultures by capillary electrophoresis. **(a)** Sizes of PCR products of alleles identified using primers to the microsatellite DNA locus *ef01*\* (upper panel – Em-D cell culture; lower panel – Em-L cell culture). **(b)** Sizes of PCR products of alleles identified using primers to the microsatellite DNA locus *ef02*\* (upper panel – Em-D cell culture; lower panel – Em-L cell culture). **(c)** Sizes of PCR products of alleles identified using primers to the microsatellite DNA locus *ef04*\* (upper panel – Em-D cell culture; lower panel – Em-L cell culture). **(d)** Sizes of PCR products of alleles identified using primers to the microsatellite DNA locus *ef09*\* (upper panel – Em-D cell culture; lower panel – Em-L cell culture). \*ID of the microsatellite DNA loci of *Euonymus fortunei* [99]. See main text for details.
