# Supplementary material for: Light and Methyl Jasmonate Impact in the Biosynthesis of Anthocyanins and VLCFAs in the <em>Euonymus maximowiczianus</em> Aril-Derived Long-Term Suspension-Cultured Cells
Source: Preprints.org preprint supplement (doi:10.20944/preprints202309.0039.v2), 2023-12-11
Supplement: Supplementary file 5 [file supplementary]

**Light and Methyl Jasmonate Impact in the Biosynthesis of Anthocyanins and VLCFAs in the *Euonymus maximowiczianus* Aril-Derived Long-Term Suspension-Cultured Cells**

**Supplementary Materials:**

Table S1. Allelic polymorphism analysis of the microsatellite DNA markers in the Em-D and Em-L suspension cell cultures.

| Locus ID*   | Number of identified alleles |      | PCR product size, bp                             |                                                  | Allelic polymorphism identity, % |
|-------------|------------------------------|------|--------------------------------------------------|--------------------------------------------------|----------------------------------|
|             | Em-D                         | Em-L | Em-D                                             | Em-L                                             |                                  |
| <i>ef01</i> | 10                           | 10   | 252; 253; 254; 255; 256; 257; 258; 259; 260; 262 | 252; 253; 254; 255; 256; 257; 258; 259; 260; 262 | 100                              |
| <i>ef02</i> | 3                            | 3    | 234; 239; 240                                    | 234; 239; 240                                    | 100                              |
| <i>ef04</i> | 1                            | 1    | 254                                              | 254                                              | 100                              |
| <i>ef09</i> | 7                            | 7    | 171; 173; 188; 190; 192; 194; 196                | 171; 173; 188; 190; 192; 194; 196                | 100                              |

\*ID of the microsatellite DNA loci of *Euonymus fortunei* [99]. See main text for details.
