# Supplementary material for: Light and Methyl Jasmonate Impact in the Biosynthesis of Anthocyanins and VLCFAs in the <em>Euonymus maximowiczianus</em> Aril-Derived Long-Term Suspension-Cultured Cells
Source: Preprints.org preprint supplement (doi:10.20944/preprints202309.0039.v2), 2023-12-11
Supplement: Supplementary file 6 [file supplementary]

## Light and Methyl Jasmonate Impact in the Biosynthesis of Anthocyanins and VLCFAs in the *Euonymus maximowiczianus* Aril-Derived Long-Term Suspension-Cultured Cells

### Supplementary Materials:

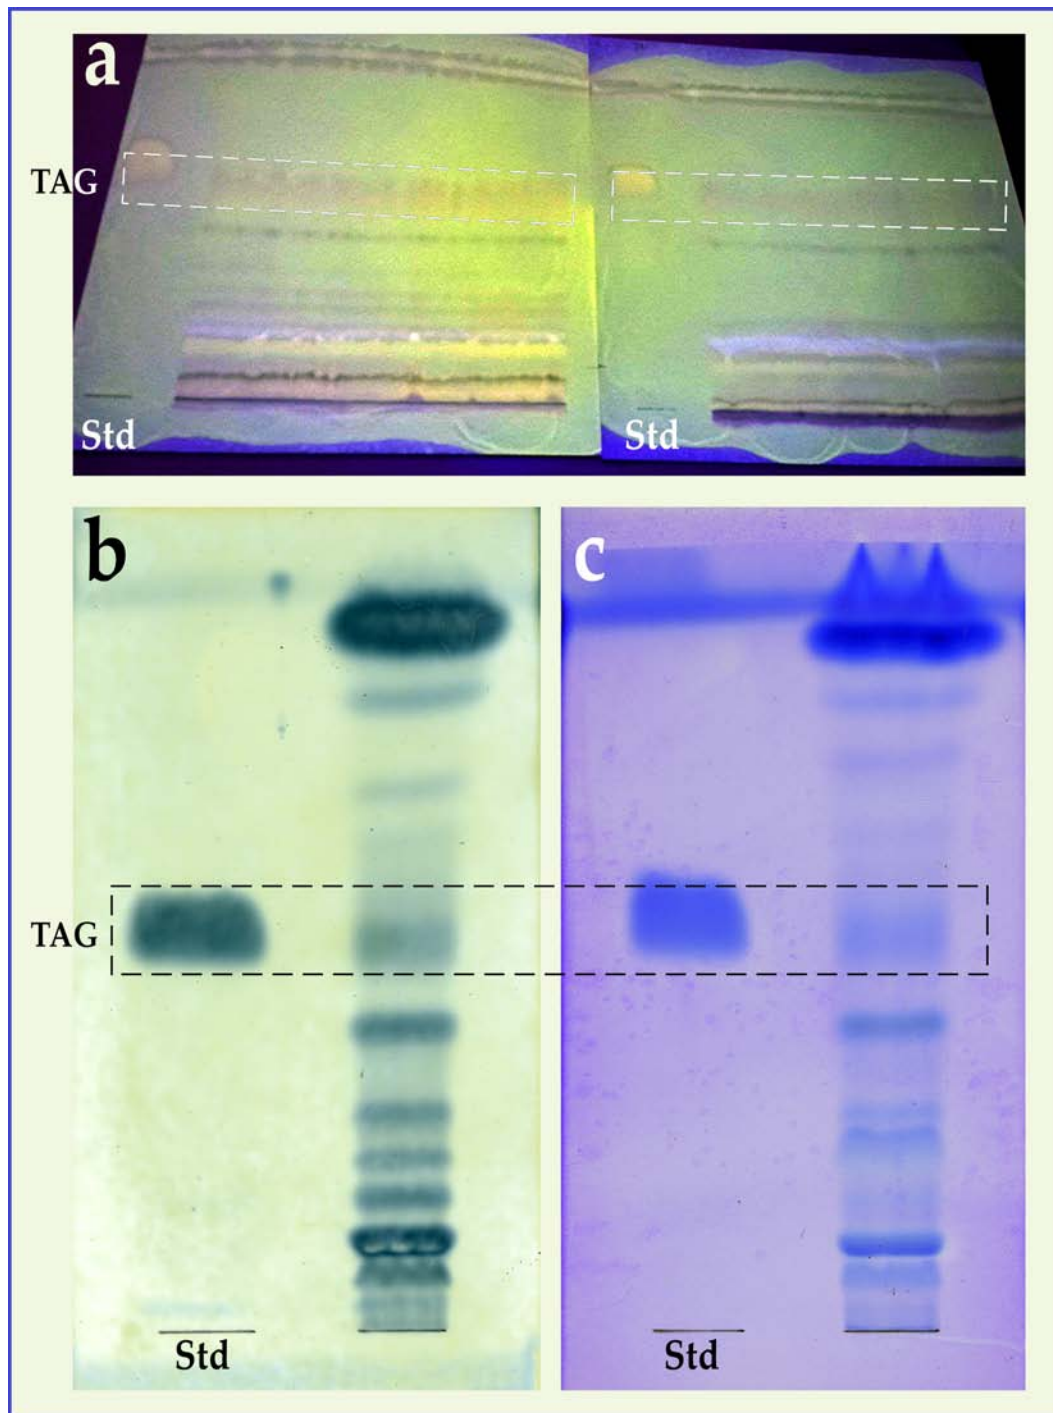

Figure S3. Thin-layer chromatography (TLC) analysis of total triacylglycerol (TAG). Chromatography was performed using Merck Silica Gel 60 TLC plates with *n*-hexane : diethyl ester (70 : 30 v/v) as a mobile phase. (a) Zone, contained TAGs was visualized under UV  $\lambda=365$  nm, pre-staining the plate by spraying with 0.05% metanolic solution of 2',7'-dichlorofluorescein. (b) Detection of lipids with a 4% solution of phosphomolybdic acid in 50% aqueous ethanol after heating for 5 min at 120 °C. (c) TLC plates were stained with a 0.02% Coomassie

brilliant blue solution in 20% methanol. See main text for details. **Std** –TAG standard, 10 µg of glyceryl trioleate. The analyzed material is Em-D cell culture on the 21st day.
